# Supplementary material for: Identification of Two Subsets of Subcompartment A1 Associated with High Transcriptional Activity and Frequent Loop Extrusion
Source: MDPI journal article supplement (doi:10.3390/biology12081058), 2023-07-27
Supplement: s1 [file s1]

Table S1. High throughput Sequencing Datasets Used in The Study

| Data types                                                                                          | Source from                                                             | Access number     |
|-----------------------------------------------------------------------------------------------------|-------------------------------------------------------------------------|-------------------|
| Hi-C, RNA-seq data<br>(ES Cells, Primary Neocortex Cortical<br>Neurons, Primary Neocortex NP Cells) | Bonev et al., 2017                                                      | GEO: GSE96107     |
| RNA-seq data<br>(Primary Thymocytes, CD69-CD4 <sup>+</sup> CD8 <sup>+</sup> )                       | Karimi et al., 2021                                                     | GEO: GSE154670    |
| RNA-seq data<br>(Macrophages)                                                                       | Cuartero et al.2018                                                     | GEO: GSE108599    |
| RNA-seq data<br>(K562, HeLa)                                                                        | She et al., 2023                                                        | GEO: GSE207330    |
| Hi-C, H3K27ac ChIP-seq data<br>(Primary Thymocytes, CD69-CD4 <sup>+</sup> CD8 <sup>+</sup> )        | Guo et al., 2022                                                        | GEO: GSE199059    |
| Hi-C data<br>(Macrophages)                                                                          | Mumbach et al., 2019                                                    | GEO: GSE115524    |
| Hi-C data<br>(K562)                                                                                 | <a href="https://data.4dnucleome.org/">https://data.4dnucleome.org/</a> | 4DN: 4DNFICEGAHRC |
| Hi-C data<br>(HeLa)                                                                                 | <a href="https://data.4dnucleome.org/">https://data.4dnucleome.org/</a> | 4DN: 4DNFITUOMFUQ |
| CUT&Tag, ChIP-seq data<br>(Nipbl for K562 and HeLa, H3K27ac for<br>K562)                            | This Study                                                              | GEO: GSE227868    |
| ChIP-seq data<br>(H3K9me3 for ES Cells)                                                             | Navarro et al., 2020                                                    | GEO: GSE149080    |
| ChIP-seq data<br>(H3K27ac for ES Cells)                                                             | Kubo et al., 2021                                                       | GEO: GSE160890    |
| ChIP-seq data<br>(Nipbl for ES Cells)                                                               | Kagey et al., 2010                                                      | GEO: GSE22557     |
| ChIP-seq data<br>(Nipbl for thymocyte)                                                              | Seitan et al., 2013                                                     | GEO: GSE48763     |
| ChIP-seq data<br>(H3K9me3 for HeLa)                                                                 | Timms et al., 2016                                                      | GEO: GSE86814     |
| ChIP-seq data<br>(H3K27ac for HeLa)                                                                 | ENCODE Project Consortium<br>(2012).                                    | GEO: GSE29611     |
| ChIP-seq data<br>(H3K9me3 for K562)                                                                 | Siegenfeld et al., 2022                                                 | GEO: GSE198613    |
