# Supplementary material for: Identification of Two Subsets of Subcompartment A1 Associated with High Transcriptional Activity and Frequent Loop Extrusion
Source: Biology (Basel). 2023 Jul 27;12(8):1058. doi: 10.3390/biology12081058 (PMC10451812; doi:10.3390/biology12081058)
Supplement: Supplementary file 1 [file biology-12-01058-s001.zip]

Archive with 4 entries (4 files):
- Supplementary Figures.pdf
- Table S1. High throughput Sequencing Datasets Used in The Study.pdf
- Table S2. List of subcompartments in mouse cells.xls
- Table S3. List of subcompartments in human cells.xls
