# Supplementary material for: Identification of Two Subsets of Subcompartment A1 Associated with High Transcriptional Activity and Frequent Loop Extrusion
Source: Biology (Basel). 2023 Jul 27;12(8):1058. doi: 10.3390/biology12081058 (PMC10451812; doi:10.3390/biology12081058)
Supplement: Supplementary file 1 [file biology-12-01058-s001.zip › Table S2. List of subcompartments in mouse cells.xls]

## Sheet: Subcomparment lists (mm9)
chrom	start	end	Thymocytes	ES_Cells	Macrophage	Cortical_Neuron	NP_Cells	Note: common A1 or common B4 was marked
chr1	3000000	3050000	B3	NA	B3	B4	B3
chr1	3050000	3100000	B3	NA	B3	B4	B3
chr1	3100000	3150000	B4	NA	B3	B4	B3
chr1	3150000	3200000	B4	NA	B3	B4	B3
chr1	3200000	3250000	B4	B3	B3	B4	B3
chr1	3250000	3300000	B4	B3	B3	B4	B3
chr1	3300000	3350000	B4	B3	B3	B4	B3
chr1	3350000	3400000	B4	B3	B3	B3	B3
chr1	3400000	3450000	B4	B3	B3	B3	B3
chr1	3450000	3500000	B4	B3	B3	B3	B3
chr1	3500000	3550000	B4	B3	B3	B3	B3
chr1	3550000	3600000	B4	B3	B3	B3	B3
chr1	3600000	3650000	B4	B3	B3	B3	B3
chr1	3650000	3700000	B4	B3	B3	B3	B3
chr1	3700000	3750000	B4	B2	B3	B4	B3
chr1	3750000	3800000	B4	NA	B3	B4	B4
chr1	3800000	3850000	B4	B2	B3	B4	B4
chr1	3850000	3900000	B4	B2	B3	B4	B4
chr1	3900000	3950000	B4	B2	B3	B4	B4
chr1	3950000	4000000	B4	B2	B3	B4	B4
chr1	4000000	4050000	B4	B2	B3	B4	B4
chr1	4050000	4100000	B4	B2	B3	B4	B4
chr1	4100000	4150000	B4	B2	B3	B4	B4
chr1	4150000	4200000	B4	NA	B3	B4	NA
chr1	4200000	4250000	B4	B2	B3	B4	B4
chr1	4250000	4300000	B4	B2	B3	B4	B4
chr1	4300000	4350000	B4	NA	B3	B4	B4
chr1	4350000	4400000	B4	B2	B2	B4	B4
chr1	4400000	4450000	B2	A4	B2	B4	B4
chr1	4450000	4500000	B2	A4	B2	B3	B2
chr1	4500000	4550000	B2	A4	B2	B3	B2
chr1	4550000	4600000	B2	A4	B2	B3	B2
chr1	4600000	4650000	B2	A4	B2	B3	B2
chr1	4650000	4700000	B2	A4	B2	B3	B2
chr1	4700000	4750000	A2	A4	B2	B3	B2
chr1	4750000	4800000	A2	A2	A3	A4	A3
chr1	4800000	4850000	A2	A2	A3	A4	A3
chr1	4850000	4900000	A2	A2	A3	A4	A3
chr1	4900000	4950000	A4	A3	A4	B1	A3
chr1	4950000	5000000	A4	A3	A4	B1	A3
chr1	5000000	5050000	A4	A3	A4	B1	A3
chr1	5050000	5100000	A4	A3	A4	B1	A3
chr1	5100000	5150000	A4	A3	A4	B1	A3
chr1	5150000	5200000	A4	A3	A4	B4	B4
chr1	5200000	5250000	B3	A3	B4	B4	B4
chr1	5250000	5300000	B3	A3	B4	B4	B4
chr1	5300000	5350000	B3	NA	B4	B4	B4
chr1	5350000	5400000	B3	B3	B4	B4	B4
chr1	5400000	5450000	B3	B3	B4	B4	B4
chr1	5450000	5500000	B3	B3	B4	B4	B4
chr1	5500000	5550000	B3	B3	B4	B4	B4
chr1	5550000	5600000	B3	B3	B4	B4	B4
chr1	5600000	5650000	B3	B3	B4	B4	B4
chr1	5650000	5700000	B3	B3	B4	B4	B4
chr1	5700000	5750000	B3	B3	B4	B4	B4
chr1	5750000	5800000	B3	B3	B4	B4	B4
chr1	5800000	5850000	B3	B3	B4	B4	B4
chr1	5850000	5900000	B3	B1	B4	B4	B4
chr1	5900000	5950000	B3	B1	B4	B4	B4
chr1	5950000	6000000	B3	B1	B4	B4	B4
chr1	6000000	6050000	B3	B1	B4	B4	B4
chr1	6050000	6100000	B3	B1	B4	B4	B4
chr1	6100000	6150000	B3	B1	B4	B4	B4
chr1	6150000	6200000	A3	A4	A4	B2	B2
chr1	6200000	6250000	A3	A4	A4	B2	B2
chr1	6250000	6300000	A3	A4	A4	B2	B2
chr1	6300000	6350000	A3	A4	A4	B2	B2
chr1	6350000	6400000	A3	A4	A4	B2	B2
chr1	6400000	6450000	A3	A4	A3	B2	B2
chr1	6450000	6500000	A3	A4	A3	B2	B2
chr1	6500000	6550000	B2	B3	A3	B2	B3
chr1	6550000	6600000	B2	B3	B1	B2	B3
chr1	6600000	6650000	B2	B3	B1	B2	B3
chr1	6650000	6700000	B2	B3	B1	B2	B2
chr1	6700000	6750000	B2	B3	B1	A4	B2
chr1	6750000	6800000	B2	B3	B1	A4	B2
chr1	6800000	6850000	B2	B3	B1	A4	B2
chr1	6850000	6900000	B2	B3	B1	B3	B3
chr1	6900000	6950000	B2	B3	B1	B3	B3
chr1	6950000	7000000	B2	B3	B1	B3	B3
chr1	7000000	7050000	A3	A3	A4	B3	B3
chr1	7050000	7100000	A3	A3	A4	B1	B2
chr1	7100000	7150000	A3	A3	A4	B1	B2
chr1	7150000	7200000	A3	A3	A4	B1	B2
chr1	7200000	7250000	B1	A4	B2	B3	B3
chr1	7250000	7300000	B1	A4	B2	B3	B3
chr1	7300000	7350000	B1	A4	B2	B3	B3
chr1	7350000	7400000	A3	NA	B2	B3	B3
chr1	7400000	7450000	A3	A4	B2	B3	B3
chr1	7450000	7500000	A3	A4	B2	B4	NA
chr1	7500000	7550000	B4	A4	B3	B4	B4
chr1	7550000	7600000	B4	B3	B3	B4	B4
chr1	7600000	7650000	B4	NA	B3	B4	B4
chr1	7650000	7700000	B4	NA	B3	B4	B4
chr1	7700000	7750000	B4	NA	B3	B4	NA
chr1	7750000	7800000	B4	B3	B3	B4	B4
chr1	7800000	7850000	B4	B3	B4	B4	NA
chr1	7850000	7900000	B4	NA	B4	B4	NA
chr1	7950000	8000000	B4	B3	B4	B4	B4
chr1	8000000	8050000	B4	B3	B4	B4	NA
chr1	8050000	8100000	B4	B3	B4	B4	B4
chr1	8100000	8150000	B4	NA	B4	B4	B4
chr1	8150000	8200000	B4	NA	B4	B4	NA
chr1	8250000	8300000	B4	NA	B4	B4	B4
chr1	8300000	8350000	B4	B3	B4	B4	B4
chr1	8350000	8400000	B4	B3	B4	B4	B4
chr1	8400000	8450000	B4	B3	B4	B4	B4
chr1	8450000	8500000	B4	B1	B4	B4	B4
chr1	8500000	8550000	B4	B1	B4	B4	B4
chr1	8550000	8600000	B4	B1	B4	B4	B4
chr1	8600000	8650000	B4	NA	B4	B4	B4
chr1	8650000	8700000	B4	NA	B4	B4	NA
chr1	8750000	8800000	B4	B1	B4	B4	B4
chr1	8800000	8850000	B4	NA	B4	B4	B4
chr1	8850000	8900000	B4	B1	B4	B4	B4
chr1	8900000	8950000	B4	B1	B4	B4	B4
chr1	8950000	9000000	B4	B1	B4	B4	B4
chr1	9000000	9050000	B4	NA	B4	B4	B4
chr1	9050000	9100000	B4	B1	B4	B4	B4
chr1	9100000	9150000	B4	B1	B4	B4	B4
chr1	9150000	9200000	B4	B1	B4	B4	B4
chr1	9200000	9250000	B4	B1	B4	B4	B3
chr1	9250000	9300000	B4	B1	B4	B4	B3
chr1	9300000	9350000	B4	B1	B4	B4	B3
chr1	9350000	9400000	B4	B1	B4	B4	B3
chr1	9400000	9450000	B4	B1	B4	B4	B3
chr1	9450000	9500000	A4	B1	B4	B4	B3
chr1	9500000	9550000	A4	A1	A3	B4	B3
chr1	9550000	9600000	A4	A1	A3	A4	A2
chr1	9600000	9650000	A4	A1	A3	A4	A2
chr1	9650000	9700000	A1	A1	A3	A4	A2
chr1	9700000	9750000	A1	A1	A1	A3	A2
chr1	9750000	9800000	A1	A1	A1	A3	A2
chr1	9800000	9850000	A1	A1	A1	A3	A2
chr1	9850000	9900000	A1	A1	A1	A3	A2
chr1	9900000	9950000	A1	A1	A1	A3	A2
chr1	9950000	10000000	A1	A1	A2	A3	A2
chr1	10000000	10050000	A1	A1	A2	A3	A2
chr1	10050000	10100000	A2	A1	A2	A3	A2
chr1	10100000	10150000	A2	A1	A2	A3	A2
chr1	10150000	10200000	A2	A1	A2	A3	A2
chr1	10200000	10250000	A2	A1	A2	B4	A2
chr1	10250000	10300000	A2	B3	A2	B4	B4
chr1	10300000	10350000	B2	B3	B3	B4	B4
chr1	10350000	10400000	B2	B3	B3	B4	B4
chr1	10400000	10450000	B2	B3	B3	B4	B4
chr1	10450000	10500000	B2	B3	B3	B4	B4
chr1	10500000	10550000	B2	B3	B3	B4	B4
chr1	10550000	10600000	B2	B3	B3	B4	B4
chr1	10600000	10650000	B2	B1	B3	B4	B4
chr1	10650000	10700000	B2	B1	B3	B4	B4
chr1	10700000	10750000	B2	B1	B3	B4	B4
chr1	10750000	10800000	B2	B1	B3	B4	B4
chr1	10800000	10850000	B3	B1	B3	B3	B4
chr1	10850000	10900000	B3	B1	B3	B3	B4
chr1	10900000	10950000	B3	B1	B3	B3	B2
chr1	10950000	11000000	B3	A4	B3	B3	B2
chr1	11000000	11050000	B3	A4	B3	B3	B2
chr1	11050000	11100000	B3	A4	B3	B3	B2
chr1	11100000	11150000	B3	A4	B3	B3	B3
chr1	11150000	11200000	B3	A4	B3	B3	B3
chr1	11200000	11250000	B3	A4	B3	B3	B3
chr1	11250000	11300000	B4	A3	B3	B3	B3
chr1	11300000	11350000	B4	A3	B3	B3	B3
chr1	11350000	11400000	B4	A3	B3	B3	B3
chr1	11400000	11450000	B4	A3	B3	B3	B3
chr1	11450000	11500000	B4	A3	B3	B3	B3
chr1	11500000	11550000	B4	A3	B3	B3	B3
chr1	11550000	11600000	B4	A3	B3	B3	B3
chr1	11600000	11650000	B4	B3	B3	B3	B3
chr1	11650000	11700000	B4	NA	B4	B3	B3
chr1	11700000	11750000	B4	NA	B4	B3	B3
chr1	11750000	11800000	B4	B3	B4	B3	B3
chr1	11800000	11850000	B4	B3	B4	B3	B3
chr1	11850000	11900000	B4	B3	B4	B3	B3
chr1	11900000	11950000	B4	B3	B4	B3	B3
chr1	11950000	12000000	B4	B3	B4	B3	B2
chr1	12000000	12050000	B4	B3	B4	B3	B2
chr1	12050000	12100000	B4	B2	B4	B3	B2
chr1	12100000	12150000	B4	B2	B4	B3	B3
chr1	12150000	12200000	B4	B2	B4	B3	B3
chr1	12200000	12250000	B4	B2	B4	B3	B3
chr1	12250000	12300000	B4	B2	B4	B3	B3
chr1	12300000	12350000	B4	B2	B4	B3	B3
chr1	12350000	12400000	B4	B2	B4	B3	B2
chr1	12400000	12450000	B4	B2	B4	B3	B2
chr1	12450000	12500000	B4	B2	B4	B3	B2
chr1	12500000	12550000	B4	B2	B4	B3	B2
chr1	12550000	12600000	B4	B2	B4	B3	B2
chr1	12600000	12650000	B4	B2	B4	B3	B2
chr1	12650000	12700000	B4	A2	B4	B1	B1
chr1	12700000	12750000	B4	A2	B4	B1	B1
chr1	12750000	12800000	B4	A2	B4	B1	B1
chr1	12800000	12850000	B1	A2	A4	B1	B1
chr1	12850000	12900000	B1	A2	A4	B1	B1
chr1	12900000	12950000	B1	A2	A4	B1	B1
chr1	12950000	13000000	B1	A2	A4	A3	A3
chr1	13000000	13050000	B1	A1	A4	A3	A3
chr1	13050000	13100000	B1	A1	A4	A3	A3
chr1	13100000	13150000	A1	A1	A4	A3	A2
chr1	13150000	13200000	A1	A2	A2	A2	A2
chr1	13200000	13250000	A1	A2	A2	A2	A2
chr1	13250000	13300000	A1	A2	A2	A2	A2
chr1	13300000	13350000	A1	A2	A2	A2	A2
chr1	13350000	13400000	A1	A2	A2	A2	A2
chr1	13400000	13450000	A1	A2	A2	A4	A3
chr1	13450000	13500000	A1	A2	A2	A4	A3
chr1	13500000	13550000	A1	A2	A2	A4	A3
chr1	13550000	13600000	A1	A2	A2	A4	A3
chr1	13600000	13650000	A1	A2	A2	A4	A3
chr1	13650000	13700000	A1	A2	A2	B3	B1
chr1	13700000	13750000	B2	B2	A4	B3	B1
chr1	13750000	13800000	B2	B2	A4	B3	B1
chr1	13800000	13850000	B2	B2	A4	B3	A4
chr1	13850000	13900000	B2	B2	A4	B3	A4
chr1	13900000	13950000	B2	B2	A4	B3	A4
chr1	13950000	14000000	B2	B2	A4	B3	A4
chr1	14000000	14050000	B2	B2	A4	B3	A4
chr1	14050000	14100000	B2	B2	A4	B3	A4
chr1	14100000	14150000	B2	B2	A4	B1	A3
chr1	14150000	14200000	B2	A4	A3	B1	A3
chr1	14200000	14250000	B2	A4	A3	B1	A3
chr1	14250000	14300000	B2	A4	A3	B1	A3
chr1	14300000	14350000	B3	A4	A3	B3	A4
chr1	14350000	14400000	B3	A4	A4	B3	A4
chr1	14400000	14450000	B3	A4	A4	B3	A4
chr1	14450000	14500000	B3	A4	A4	B3	A4
chr1	14500000	14550000	B3	B1	A3	B3	A4
chr1	14550000	14600000	B3	B1	A3	B3	B1
chr1	14600000	14650000	B3	B1	A3	B3	B1
chr1	14650000	14700000	B3	B1	B2	B3	B1
chr1	14700000	14750000	B2	B1	B2	B3	B1
chr1	14750000	14800000	B2	B1	B2	B4	B3
chr1	14800000	14850000	B2	B1	B2	B4	B3
chr1	14850000	14900000	B2	B1	B2	B4	B3
chr1	14900000	14950000	B2	B1	B2	B4	B3
chr1	14950000	15000000	B2	B1	B2	B4	B3
chr1	15000000	15050000	B2	B1	B2	B4	B3
chr1	15050000	15100000	B3	B3	B3	B4	B3
chr1	15100000	15150000	B3	B3	B3	B4	B3
chr1	15150000	15200000	B3	B3	B3	B4	B3
chr1	15200000	15250000	B3	B3	B3	B4	B3
chr1	15250000	15300000	B3	B3	B3	B3	B3
chr1	15300000	15350000	B3	B3	B3	B3	B3
chr1	15350000	15400000	B3	B3	B3	B3	B3
chr1	15400000	15450000	B3	B3	B3	B3	B3
chr1	15450000	15500000	B3	B3	B3	B3	B3
chr1	15500000	15550000	B3	B3	B3	B3	B3
chr1	15550000	15600000	B3	B3	B3	B2	B3
chr1	15600000	15650000	B3	B3	B3	B2	B3
chr1	15650000	15700000	B3	A3	B3	B3	B3
chr1	15700000	15750000	B3	A3	A4	B3	B3
chr1	15750000	15800000	A3	A3	A4	B3	B1
chr1	15800000	15850000	A3	A3	A4	B3	B1
chr1	15850000	15900000	A3	A3	A4	B3	B1
chr1	15900000	15950000	B1	B1	B2	B3	B2
chr1	15950000	16000000	B1	B1	B2	B3	B2
chr1	16000000	16050000	B1	B1	B2	B3	B2
chr1	16050000	16100000	A2	A3	A3	B1	B1
chr1	16100000	16150000	A2	A3	A3	B1	B1
chr1	16150000	16200000	A2	A3	A3	B1	B1
chr1	16200000	16250000	A2	B1	A3	B1	B1
chr1	16250000	16300000	A2	B1	A3	B1	B1
chr1	16300000	16350000	A4	B1	A3	B1	B1
chr1	16350000	16400000	A4	B1	A3	B1	B1
chr1	16400000	16450000	A4	B1	A3	B1	B1
chr1	16450000	16500000	A4	B1	A3	B1	B1
chr1	16500000	16550000	A2	A3	A2	A3	A3
chr1	16550000	16600000	A2	A3	A2	A3	A3
chr1	16600000	16650000	A2	A3	A2	A3	A3
chr1	16650000	16700000	A2	A3	A2	B3	A3
chr1	16700000	16750000	A2	B2	A2	B3	B3
chr1	16750000	16800000	B2	B2	B2	B3	B3
chr1	16800000	16850000	B2	B2	B2	B3	B3
chr1	16850000	16900000	B2	B2	B2	B3	B3
chr1	16900000	16950000	B2	B2	B2	B3	B3
chr1	16950000	17000000	B2	B2	B2	B3	B1
chr1	17000000	17050000	B2	B2	B2	B2	B1
chr1	17050000	17100000	B2	A4	B2	B2	B1
chr1	17100000	17150000	B2	A4	B2	B2	B1
chr1	17150000	17200000	B2	A4	B2	B4	B4
chr1	17200000	17250000	B4	A4	B2	B4	B4
chr1	17250000	17300000	B4	B2	B2	B4	B4
chr1	17300000	17350000	B4	B2	B2	B4	B4
chr1	17350000	17400000	B4	B2	B1	B4	B4
chr1	17400000	17450000	B4	B2	B1	B4	B4
chr1	17450000	17500000	B4	B2	B1	B4	B4
chr1	17500000	17550000	B4	B2	B1	B4	B4
chr1	17550000	17600000	B4	B2	B1	B4	B4
chr1	17600000	17650000	B4	B2	B1	B4	B3
chr1	17650000	17700000	B4	B2	B3	B4	B3
chr1	17700000	17750000	B4	B2	B3	B4	B3
chr1	17750000	17800000	B4	B2	B3	B4	B4
chr1	17800000	17850000	B4	B2	B3	B4	B4
chr1	17850000	17900000	B4	B2	B3	B4	B4
chr1	17900000	17950000	B4	B1	B3	B4	B4
chr1	17950000	18000000	B4	B1	B3	B3	B3
chr1	18000000	18050000	B4	B1	B3	B3	B3
chr1	18050000	18100000	B4	B1	B3	B3	B3
chr1	18100000	18150000	B4	B1	B3	B3	B3
chr1	18150000	18200000	B4	B1	B3	B3	B3
chr1	18200000	18250000	B4	B1	B3	B3	B3
chr1	18250000	18300000	B4	B1	B3	B3	B3
chr1	18300000	18350000	B4	B1	B3	B3	B3
chr1	18350000	18400000	B4	B3	B3	B3	B3
chr1	18400000	18450000	B4	B3	B4	B4	B3
chr1	18450000	18500000	B4	B3	B4	B4	B3
chr1	18500000	18550000	B4	B3	B4	B4	B4
chr1	18550000	18600000	B4	B3	B4	B4	B4
chr1	18600000	18650000	B4	B3	B4	B4	B4
chr1	18650000	18700000	B4	B3	B4	B4	B4
chr1	18700000	18750000	B4	B3	B4	B4	B4
chr1	18750000	18800000	B4	B3	B4	B4	B4
chr1	18800000	18850000	B4	B3	B4	B4	B4
chr1	18850000	18900000	B4	B3	B4	B4	B4
chr1	18900000	18950000	B4	B3	B4	B4	B4
chr1	18950000	19000000	B4	B3	B4	B4	B3
chr1	19000000	19050000	B4	B3	B4	B4	B3
chr1	19050000	19100000	B4	B1	B4	B2	B3
chr1	19100000	19150000	B4	B1	B3	B2	B2
chr1	19150000	19200000	B4	B1	B3	B2	B2
chr1	19200000	19250000	B4	B1	B3	B2	B2
chr1	19250000	19300000	B4	B1	B3	B4	B2
chr1	19300000	19350000	B4	B4	B4	B4	B4	Common_B4
chr1	19350000	19400000	B4	B4	B4	B4	B4	Common_B4
chr1	19400000	19450000	B4	B4	B4	B4	B4	Common_B4
chr1	19450000	19500000	B4	B4	B4	B4	B4	Common_B4
chr1	19500000	19550000	B4	B4	B4	B4	B4	Common_B4
chr1	19550000	19600000	B4	B4	B4	B4	B4	Common_B4
chr1	19600000	19650000	B4	B4	B4	B4	B4	Common_B4
chr1	19650000	19700000	B4	B4	B4	B4	B4	Common_B4
chr1	19700000	19750000	B4	B4	B4	B4	B4	Common_B4
chr1	19750000	19800000	B4	B4	B4	B4	B4	Common_B4
chr1	19800000	19850000	B4	B4	B4	B4	B3
chr1	19850000	19900000	B4	B4	B4	B2	B3
chr1	19900000	19950000	B4	B4	B4	B2	B3
chr1	19950000	20000000	B4	B4	B4	B2	B3
chr1	20000000	20050000	B4	B4	B4	B2	B3
chr1	20050000	20100000	B4	B4	B4	B3	B3
chr1	20100000	20150000	B3	B4	B4	B3	B3
chr1	20150000	20200000	B3	B4	B4	B3	B3
chr1	20200000	20250000	B3	B4	B4	B3	B3
chr1	20250000	20300000	B3	B2	B4	B3	B3
chr1	20300000	20350000	B3	B2	B4	B3	B3
chr1	20350000	20400000	B3	B2	B4	B3	B2
chr1	20400000	20450000	B3	B2	B4	B3	B2
chr1	20450000	20500000	B3	B2	B4	B3	B2
chr1	20500000	20550000	B3	B2	B4	B3	B2
chr1	20550000	20600000	B3	B2	B4	B3	B2
chr1	20600000	20650000	B3	B2	B4	B3	B2
chr1	20650000	20700000	B3	B2	B4	B3	B2
chr1	20700000	20750000	B3	B2	B4	B3	B2
chr1	20750000	20800000	A2	A2	A3	B3	A3
chr1	20800000	20850000	A2	A2	A3	B1	A3
chr1	20850000	20900000	A2	A2	A3	B1	A3
chr1	20900000	20950000	A2	A2	A3	B1	A3
chr1	20950000	21000000	A2	A3	A3	B1	A3
chr1	21000000	21050000	A2	A3	A3	B1	A3
chr1	21050000	21100000	A2	A3	A3	B1	A3
chr1	21100000	21150000	A2	A3	A4	B3	B2
chr1	21150000	21200000	A2	A3	A4	B3	B2
chr1	21200000	21250000	A2	A3	A4	B3	B2
chr1	21250000	21300000	A2	A3	A4	B3	B2
chr1	21300000	21350000	A2	B3	B2	B3	B2
chr1	21350000	21400000	A2	B3	B2	B3	B2
chr1	21400000	21450000	A2	B3	B2	B3	B2
chr1	21450000	21500000	A2	B3	B2	B3	B2
chr1	21500000	21550000	A2	B3	B2	B3	B3
chr1	21550000	21600000	A2	B3	B2	B3	B3
chr1	21600000	21650000	A2	B3	B2	B3	B3
chr1	21650000	21700000	A2	B3	B2	B3	B3
chr1	21700000	21750000	A2	B3	B2	B3	B3
chr1	21750000	21800000	A2	B3	B2	B3	B3
chr1	21800000	21850000	A2	B3	B2	B3	B2
chr1	21850000	21900000	A2	B3	B2	B3	B2
chr1	21900000	21950000	A2	B3	B2	B3	B2
chr1	21950000	22000000	A2	B3	B2	B3	B2
chr1	22000000	22050000	B1	B3	B3	B3	B3
chr1	22050000	22100000	B1	B3	B3	B3	B3
chr1	22100000	22150000	B1	B3	B3	B3	B3
chr1	22150000	22200000	B1	B3	B3	B3	B3
chr1	22200000	22250000	B1	B3	B3	B3	B3
chr1	22250000	22300000	B1	A4	B3	B3	B2
chr1	22300000	22350000	B1	A4	B3	B3	B2
chr1	22350000	22400000	B3	A4	B4	B3	B2
chr1	22400000	22450000	B3	A4	B4	B3	NA
chr1	22450000	22500000	B3	A4	B4	B3	NA
chr1	22500000	22550000	B3	A4	B4	B2	B2
chr1	22550000	22600000	B3	B3	B4	B2	B2
chr1	22600000	22650000	B3	B3	B4	B2	B2
chr1	22650000	22700000	B3	B3	B4	B2	B2
chr1	22700000	22750000	B3	B3	B4	B2	B2
chr1	22750000	22800000	B3	B3	B4	B2	B2
chr1	22800000	22850000	B3	B3	B4	B2	B2
chr1	22850000	22900000	B3	B3	B4	B3	B3
chr1	22900000	22950000	B3	B3	B4	B3	B3
chr1	22950000	23000000	B3	B3	B4	B3	B3
chr1	23000000	23050000	B3	B3	B4	B3	B3
chr1	23050000	23100000	B3	B3	B4	B2	B3
chr1	23100000	23150000	B3	B3	B4	B2	B3
chr1	23150000	23200000	B3	B3	B4	B2	B3
chr1	23200000	23250000	B3	B3	B4	B2	A4
chr1	23250000	23300000	B1	A4	A3	B1	A4
chr1	23300000	23350000	B1	A4	A3	B1	A4
chr1	23350000	23400000	B1	A4	A3	B1	A4
chr1	23400000	23450000	B1	B2	A3	B2	A4
chr1	23450000	23500000	B3	B2	A3	B2	A4
chr1	23500000	23550000	B3	B2	B2	B2	A4
chr1	23550000	23600000	B3	B2	B2	B2	A4
chr1	23600000	23650000	B3	B2	B2	B2	A4
chr1	23650000	23700000	B3	B2	B2	B2	A4
chr1	23700000	23750000	B3	B2	B2	B2	A4
chr1	23750000	23800000	B3	B2	B2	A2	A2
chr1	23800000	23850000	A3	B2	A4	A2	A2
chr1	23850000	23900000	A3	A2	A4	A2	A2
chr1	23900000	23950000	A3	A2	A4	A2	A2
chr1	23950000	24000000	A3	A2	A4	A2	A2
chr1	24000000	24050000	A3	A2	A4	A2	A2
chr1	24050000	24100000	A3	A2	A4	A2	A2
chr1	24100000	24150000	B3	A2	A4	A2	A2
chr1	24150000	24200000	B3	B1	B3	A2	A2
chr1	24200000	24250000	B3	B1	B3	A2	A2
chr1	24250000	24300000	B3	B1	B3	B1	B1
chr1	24300000	24350000	B3	B1	B3	B1	B1
chr1	24350000	24400000	B3	B3	B3	B1	B1
chr1	24400000	24450000	B3	B3	B3	B1	B1
chr1	24450000	24500000	B3	B3	B1	A4	B1
chr1	24500000	24550000	B3	B3	B1	A4	B1
chr1	24550000	24600000	B3	B3	B1	A4	B1
chr1	24600000	24650000	B3	B1	B1	A4	B1
chr1	24650000	24700000	A3	B1	A3	A4	B1
chr1	24750000	24800000	A3	B1	A3	A4	B1
chr1	24800000	24850000	A3	B1	A3	A4	B1
chr1	24850000	24900000	B4	B3	B4	B1	B1
chr1	24900000	24950000	B4	B3	B4	B1	B1
chr1	24950000	25000000	B4	B3	B4	B1	B1
chr1	25000000	25050000	B4	B3	B4	B1	B1
chr1	25050000	25100000	B4	B2	B4	B1	A4
chr1	25100000	25150000	B4	B2	B4	A3	A4
chr1	25150000	25200000	B4	B2	B4	A3	A4
chr1	25200000	25250000	B4	B2	B4	A3	A4
chr1	25250000	25300000	B4	B2	B4	A3	A4
chr1	25300000	25350000	B4	B2	B4	B1	B2
chr1	25350000	25400000	B4	B2	B4	B1	B2
chr1	25400000	25450000	B4	B4	B4	B1	B2
chr1	25450000	25500000	B4	B4	B4	B1	B2
chr1	25500000	25550000	B4	B4	B4	A4	B2
chr1	25550000	25600000	B4	B4	B4	A4	B2
chr1	25600000	25650000	B4	B4	B4	A4	B2
chr1	25650000	25700000	B4	B4	B4	A4	B2
chr1	25700000	25750000	B4	B4	B4	A4	B2
chr1	25750000	25800000	B4	B4	B4	A4	B2
chr1	25800000	25850000	B4	B4	B4	A4	B2
chr1	25850000	25900000	B4	B2	B4	A4	B2
chr1	25900000	25950000	B4	B2	B4	B4	B2
chr1	25950000	26000000	B4	B2	B4	B4	B2
chr1	26000000	26050000	B4	B4	B4	B4	B3
chr1	26050000	26100000	B4	B4	B4	B4	B3
chr1	26100000	26150000	B4	B4	B4	B4	B3
chr1	26150000	26200000	B4	B4	B4	B4	B3
chr1	26200000	26250000	B4	B4	B4	B4	B3
chr1	26250000	26300000	B4	B4	B4	B4	B3
chr1	26300000	26350000	B4	B3	B4	B4	B3
chr1	26350000	26400000	B4	B3	B4	B4	B3
chr1	26400000	26450000	B4	B3	B4	B4	B3
chr1	26450000	26500000	B4	B3	B4	B4	B3
chr1	26500000	26550000	B4	B3	B4	B4	B4
chr1	26550000	26600000	B4	B4	B4	B4	B4	Common_B4
chr1	26600000	26650000	B4	B4	B3	B4	B4
chr1	26650000	26700000	B4	B4	B3	B4	B4
chr1	26700000	26750000	B4	B4	B3	B4	B4
chr1	26750000	26800000	B4	B4	B4	B3	B4
chr1	26800000	26850000	B4	B3	B4	B3	B4
chr1	26850000	26900000	B4	B3	B4	B3	B4
chr1	26900000	26950000	B4	B3	B4	B3	B4
chr1	26950000	27000000	B4	B3	B4	B4	B4
chr1	27000000	27050000	B4	B3	B4	B4	B4
chr1	27050000	27100000	B4	B3	B4	B4	B4
chr1	27100000	27150000	B4	B3	B4	B4	B4
chr1	27150000	27200000	B4	B3	B4	B4	B4
chr1	27200000	27250000	B4	B3	B4	B4	NA
chr1	27250000	27300000	B4	B3	B4	B4	B4
chr1	27300000	27350000	B4	B3	B4	B4	B4
chr1	27350000	27400000	B4	B3	B4	B4	B4
chr1	27400000	27450000	B4	B3	B4	B4	B4
chr1	27450000	27500000	B4	B4	B4	B4	B4	Common_B4
chr1	27500000	27550000	B4	B4	B4	B4	B4	Common_B4
chr1	27550000	27600000	B4	B4	B4	B2	B4
chr1	27600000	27650000	B4	B4	B4	B2	B4
chr1	27650000	27700000	B4	B4	B4	B2	B4
chr1	27700000	27750000	B4	B4	B4	B2	B4
chr1	27750000	27800000	B4	B4	B4	B3	NA
chr1	27800000	27850000	B4	B4	B4	B3	B4
chr1	27850000	27900000	B4	B4	B4	B3	B4
chr1	27900000	27950000	B4	B4	B4	B3	B4
chr1	27950000	28000000	B4	B4	B4	B3	B4
chr1	28000000	28050000	B4	B4	B1	B3	B4
chr1	28050000	28100000	B4	B4	B1	B3	B4
chr1	28100000	28150000	B4	B4	B1	B3	B4
chr1	28150000	28200000	B4	B4	B1	B2	B4
chr1	28200000	28250000	B4	B4	B4	B2	B4
chr1	28250000	28300000	B4	B3	B4	B2	B4
chr1	28300000	28350000	B4	B3	B4	B2	B4
chr1	28350000	28400000	B4	B3	B4	B2	B4
chr1	28400000	28450000	B4	B3	B4	B3	B4
chr1	28450000	28500000	B4	B3	B4	B3	B4
chr1	28500000	28550000	B4	B4	B4	B3	B4
chr1	28550000	28600000	B4	B4	B4	B3	B4
chr1	28600000	28650000	B4	B4	B4	B3	B4
chr1	28650000	28700000	B4	B4	B4	B3	B3
chr1	28700000	28750000	B4	B4	B4	B3	B3
chr1	28750000	28800000	B3	B4	B3	B4	B3
chr1	28800000	28850000	B3	B4	B3	B4	B4
chr1	28850000	28900000	B4	B4	B4	B4	B4	Common_B4
chr1	28900000	28950000	B4	B4	B4	B4	B4	Common_B4
chr1	28950000	29000000	B4	B4	B4	B4	B4	Common_B4
chr1	29000000	29050000	B4	B4	B4	B4	B4	Common_B4
chr1	29050000	29100000	B4	B4	B4	B4	B4	Common_B4
chr1	29100000	29150000	B4	B4	B4	B4	B4	Common_B4
chr1	29150000	29200000	B4	B4	B4	B4	B3
chr1	29200000	29250000	B4	B4	B4	B4	B3
chr1	29250000	29300000	B4	B4	B4	B4	B3
chr1	29300000	29350000	B4	B4	B4	B4	B4	Common_B4
chr1	29350000	29400000	B4	B4	B4	B4	B4	Common_B4
chr1	29400000	29450000	B4	B4	B4	B4	B4	Common_B4
chr1	29450000	29500000	B4	B4	B4	B4	B4	Common_B4
chr1	29500000	29550000	B4	B4	B4	B4	B4	Common_B4
chr1	29550000	29600000	B4	B4	B4	B4	B4	Common_B4
chr1	29600000	29650000	B4	B4	B4	B4	B4	Common_B4
chr1	29650000	29700000	B4	B4	B4	B4	B4	Common_B4
chr1	29700000	29750000	B4	B4	B4	B4	NA
chr1	29750000	29800000	B4	B4	B4	B4	B4	Common_B4
chr1	29800000	29850000	B4	B3	B4	B4	B4
chr1	29850000	29900000	B4	B3	B4	B4	B4
chr1	29900000	29950000	B4	B3	B4	B4	B4
chr1	29950000	30000000	B4	B3	B4	B4	B4
chr1	30000000	30050000	B4	B3	B4	B4	B3
chr1	30050000	30100000	B4	B3	B4	B4	B3
chr1	30100000	30150000	B4	B3	B3	B4	B3
chr1	30150000	30200000	B4	B3	B3	B4	B3
chr1	30200000	30250000	B4	B3	B4	B4	B4
chr1	30250000	30300000	B4	B3	B4	B4	B4
chr1	30300000	30350000	B4	B3	B4	B4	B4
chr1	30350000	30400000	B4	B3	B4	B4	B4
chr1	30400000	30450000	B4	B3	B4	B4	B4
chr1	30450000	30500000	B4	B3	B4	B4	B4
chr1	30500000	30550000	B4	B3	B4	B4	B4
chr1	30550000	30600000	B4	B3	B4	B4	B3
chr1	30600000	30650000	B4	B3	B4	B2	B3
chr1	30650000	30700000	B4	B3	B4	B2	B3
chr1	30700000	30750000	B4	B3	B4	B2	B3
chr1	30750000	30800000	B4	B3	B4	B2	B3
chr1	30800000	30850000	A2	A2	A3	A4	A4
chr1	30850000	30900000	A2	A2	A3	A4	A4
chr1	30900000	30950000	A2	A2	A3	A4	A4
chr1	30950000	31000000	A2	A2	A3	A4	A4
chr1	31000000	31050000	A2	B2	A3	B1	A4
chr1	31050000	31100000	B1	B2	A4	B1	B3
chr1	31100000	31150000	B1	B2	A4	B1	B3
chr1	31150000	31200000	B1	B2	A4	B1	B3
chr1	31200000	31250000	B1	B2	A4	B1	B3
chr1	31250000	31300000	B1	B2	B3	B1	B3
chr1	31300000	31350000	B3	B2	B3	B3	B3
chr1	31350000	31400000	B3	B2	B3	B3	B4
chr1	31400000	31450000	B3	B4	B3	B3	B4
chr1	31450000	31500000	B3	B4	B3	B3	B4
chr1	31500000	31550000	B3	B4	B3	B3	B4
chr1	31550000	31600000	B3	B4	B3	B3	B4
chr1	31600000	31650000	B3	B4	B3	B3	B4
chr1	31650000	31700000	B3	B3	B3	B3	B4
chr1	31700000	31750000	B3	B3	B4	B3	B4
chr1	31750000	31800000	B3	B3	B4	B3	B4
chr1	31800000	31850000	B3	B4	B4	B3	B4
chr1	31850000	31900000	B3	B4	B4	B3	B4
chr1	31900000	31950000	B3	B4	B4	B3	B4
chr1	31950000	32000000	B3	B4	B4	B3	B4
chr1	32000000	32050000	B3	B4	B4	B3	B4
chr1	32050000	32100000	B3	B4	B4	B3	B4
chr1	32100000	32150000	B3	B3	B4	B3	B4
chr1	32150000	32200000	B3	B3	B4	B3	B3
chr1	32200000	32250000	B3	B3	B4	A3	B3
chr1	32250000	32300000	B3	B3	B4	A3	B3
chr1	32300000	32350000	B4	B3	B4	A3	B3
chr1	32350000	32400000	B4	B3	B4	A3	B3
chr1	32400000	32450000	B4	B3	B4	A3	B3
chr1	32450000	32500000	B4	B3	B4	A4	B3
chr1	32500000	32550000	B4	B4	B4	A4	B3
chr1	32550000	32600000	B2	B4	B4	A4	B3
chr1	32600000	32650000	B2	B4	B4	A4	B4
chr1	32650000	32700000	B2	B4	B4	A4	B4
chr1	32700000	32750000	B2	B4	B4	A4	B4
chr1	32750000	32800000	B2	B4	B3	B2	B4
chr1	32800000	32850000	B2	B4	B3	B2	B4
chr1	32850000	32900000	B2	B4	B3	B2	B4
chr1	32900000	32950000	B2	B4	B3	B2	B4
chr1	32950000	33000000	B2	B4	B3	B2	B4
chr1	33000000	33050000	B2	B4	B3	B2	B4
chr1	33050000	33100000	B2	B3	B3	B2	B2
chr1	33100000	33150000	B2	B3	B3	B2	B2
chr1	33150000	33200000	B2	B3	B3	B2	B2
chr1	33200000	33250000	B2	B3	B3	B2	B2
chr1	33250000	33300000	B2	B3	B3	B2	B2
chr1	33300000	33350000	B2	B3	B3	A4	B2
chr1	33350000	33400000	B2	B3	B3	A4	B2
chr1	33400000	33450000	B2	B3	B3	A4	B2
chr1	33450000	33500000	B2	B3	B3	A4	B2
chr1	33500000	33550000	A1	B3	A3	A4	B2
chr1	33550000	33600000	A1	B3	A3	A4	B2
chr1	33600000	33650000	A1	B3	A3	A4	B2
chr1	33650000	33700000	A1	A1	A3	A4	B2
chr1	33700000	33750000	A1	A1	A3	A1	A2
chr1	33750000	33800000	A1	A1	A3	A1	A2
chr1	33800000	33850000	A1	A1	A1	A1	A2
chr1	33850000	33900000	A1	A1	A1	A1	A2
chr1	33900000	33950000	A3	A1	A1	A1	A2
chr1	33950000	34000000	A3	A1	A1	A1	A2
chr1	34000000	34050000	A3	A1	A1	A1	A2
chr1	34050000	34100000	A3	A1	A1	A1	A1
chr1	34100000	34150000	A3	A1	A2	A1	A1
chr1	34150000	34200000	A3	A1	A2	A1	A1
chr1	34200000	34250000	A3	A1	A2	A1	A1
chr1	34250000	34300000	A3	A1	A2	A1	A1
chr1	34300000	34350000	A3	A1	A2	A1	A1
chr1	34350000	34400000	A3	A2	A2	A2	A1
chr1	34400000	34450000	A3	A2	A2	A2	A1
chr1	34450000	34500000	A2	A2	A2	A2	A1
chr1	34500000	34550000	A2	A2	A2	A2	A1
chr1	34550000	34600000	A2	A2	A2	A2	A2
chr1	34600000	34650000	A4	A2	A4	A2	A2
chr1	34650000	34700000	A4	A2	A4	A2	A2
chr1	34700000	34750000	A4	A2	A4	A2	A2
chr1	34750000	34800000	A4	A2	A4	A2	A2
chr1	34800000	34850000	A2	A2	A2	A2	A2
chr1	34850000	34900000	A2	A2	A2	A2	A2
chr1	34900000	34950000	A2	A2	A2	A2	A2
chr1	34950000	35000000	B2	B3	B3	B2	B3
chr1	35000000	35050000	B2	B3	B3	B2	B3
chr1	35050000	35100000	B2	B3	B3	B2	B3
chr1	35100000	35150000	B2	B3	B3	B2	B3
chr1	35150000	35200000	B2	B3	B3	B2	B3
chr1	35200000	35250000	B2	B3	B3	B2	B3
chr1	35250000	35300000	B2	B2	B3	B1	B3
chr1	35300000	35350000	B2	B2	B3	B1	B3
chr1	35350000	35400000	B2	B2	B2	B1	B3
chr1	35400000	35450000	A2	B2	B2	B1	B2
chr1	35450000	35500000	A2	B2	B2	B1	B2
chr1	35500000	35550000	A2	B2	B2	B1	B2
chr1	35550000	35600000	A2	B2	B2	B1	B2
chr1	35600000	35650000	A2	B2	B2	B1	B2
chr1	35650000	35700000	A2	B2	B2	B1	B2
chr1	35700000	35750000	A2	B2	B2	A3	A4
chr1	35750000	35800000	A2	A2	A2	A3	A4
chr1	35800000	35850000	A2	A2	A2	A3	A4
chr1	35850000	35900000	A2	A2	A2	A3	A3
chr1	35900000	35950000	A2	A2	A2	A3	A3
chr1	35950000	36000000	A2	A2	A2	A3	A3
chr1	36000000	36050000	A2	A2	A2	A3	A3
chr1	36050000	36100000	A2	A2	A2	A3	A3
chr1	36100000	36150000	A1	A2	A1	A3	A3
chr1	36150000	36200000	A1	A2	A1	A1	A3
chr1	36200000	36250000	A1	A1	A1	A1	A1	Common_A1
chr1	36250000	36300000	A1	A1	A1	A1	A1	Common_A1
chr1	36300000	36350000	A1	A1	A1	A1	A1	Common_A1
chr1	36400000	36450000	A1	A1	A1	A1	A1	Common_A1
chr1	36450000	36500000	A1	A1	A1	A1	A1	Common_A1
chr1	36500000	36550000	A1	A1	A1	A1	A1	Common_A1
chr1	36650000	36700000	A1	A1	A1	A1	A1	Common_A1
chr1	36700000	36750000	A1	A1	A1	A1	A1	Common_A1
chr1	36900000	36950000	A1	A1	A1	A1	A1	Common_A1
chr1	37000000	37050000	A1	A1	A1	A1	A1	Common_A1
chr1	37050000	37100000	A1	A1	A1	A1	A1	Common_A1
chr1	37100000	37150000	A2	A1	A4	A1	A1
chr1	37150000	37200000	A2	A1	A4	A1	A1
chr1	37200000	37250000	A2	A2	A4	A1	A2
chr1	37250000	37300000	A2	A2	A4	A1	A2
chr1	37300000	37350000	A2	A2	A4	A1	A2
chr1	37350000	37400000	A2	A2	A1	A1	A2
chr1	37400000	37450000	A1	A2	A1	A1	A2
chr1	37550000	37600000	A1	A2	A1	A1	A2
chr1	37600000	37650000	A1	A2	A1	A1	A2
chr1	37700000	37750000	A1	A2	A3	A1	A3
chr1	37750000	37800000	A2	A3	A3	A1	A3
chr1	37800000	37850000	A2	A3	A3	A1	A3
chr1	37850000	37900000	A2	A3	A3	A1	A3
chr1	37900000	37950000	A2	A3	A3	A1	A1
chr1	37950000	38000000	A2	A1	A1	A1	A1
chr1	38000000	38050000	A2	A1	A1	A1	A1
chr1	38050000	38100000	A2	A1	A1	A1	A1
chr1	38100000	38150000	A2	A1	A1	A1	A1
chr1	38150000	38200000	A2	A1	A1	A1	A1
chr1	38200000	38250000	A2	A4	A4	A1	A1
chr1	38250000	38300000	A2	A4	A4	A2	A1
chr1	38300000	38350000	A2	A4	A4	A2	A1
chr1	38350000	38400000	A2	A4	A4	A2	A1
chr1	38400000	38450000	A2	A4	A4	A2	A1
chr1	38450000	38500000	A2	A4	A3	A1	A1
chr1	38500000	38550000	A2	A4	A3	A1	A1
chr1	38550000	38600000	A2	A3	A3	A1	A1
chr1	38600000	38650000	A2	A3	A3	A1	A1
chr1	38650000	38700000	A2	A3	A3	A1	A1
chr1	38700000	38750000	A2	A3	A4	A1	A2
chr1	38750000	38800000	A2	A3	A4	A1	A2
chr1	38800000	38850000	A2	A3	A4	A1	A2
chr1	38850000	38900000	A2	A2	A4	A1	A2
chr1	38900000	38950000	A2	A2	A4	A1	A2
chr1	38950000	39000000	A2	A2	A4	A1	A2
chr1	39000000	39050000	A1	A2	A2	A1	A2
chr1	39050000	39100000	A1	A3	A2	A2	A3
chr1	39100000	39150000	A1	A3	A2	A2	A3
chr1	39150000	39200000	A1	A3	A2	A2	A3
chr1	39200000	39250000	A1	A3	A2	A2	A3
chr1	39250000	39300000	A1	A2	A2	A2	A3
chr1	39300000	39350000	A1	A2	A1	A1	A3
chr1	39350000	39400000	A1	A2	A1	A1	A3
chr1	39400000	39450000	A1	A1	A1	A1	A1	Common_A1
chr1	39450000	39500000	A1	A1	A1	A1	A1	Common_A1
chr1	39500000	39550000	A1	A1	A1	A1	A1	Common_A1
chr1	39550000	39600000	A1	A1	A1	A1	A1	Common_A1
chr1	39600000	39650000	A1	A1	A1	A1	A1	Common_A1
chr1	39650000	39700000	A1	A1	A1	A1	A1	Common_A1
chr1	39700000	39750000	A1	A2	A1	A1	A1
chr1	39750000	39800000	A1	A2	A1	A1	A1
chr1	39800000	39850000	A1	A2	A1	A1	A1
chr1	39850000	39900000	A1	A2	A1	A1	A1
chr1	39900000	39950000	A1	A1	A1	A1	A1	Common_A1
chr1	39950000	40000000	A1	A1	A1	A1	A1	Common_A1
chr1	40000000	40050000	A1	A1	A1	A1	A1	Common_A1
chr1	40050000	40100000	A1	A1	A1	A1	A1	Common_A1
chr1	40100000	40150000	A1	A4	A1	A1	A4
chr1	40150000	40200000	A3	A4	A1	A4	A4
chr1	40200000	40250000	A3	A4	A1	A4	A4
chr1	40250000	40300000	A3	A4	A1	A4	A4
chr1	40300000	40350000	A3	A4	A1	A4	A4
chr1	40350000	40400000	A3	A4	A1	A4	A4
chr1	40400000	40450000	A3	A4	A1	A4	A4
chr1	40450000	40500000	A3	B2	A1	A4	A4
chr1	40500000	40550000	A3	B2	A1	A4	A4
chr1	40550000	40600000	A3	B2	A1	A4	A4
chr1	40600000	40650000	A4	B2	A3	A4	A4
chr1	40650000	40700000	A4	B2	A3	A4	A4
chr1	40700000	40750000	A4	B2	A3	A4	A4
chr1	40750000	40800000	A4	B2	A3	A4	A4
chr1	40800000	40850000	A4	B2	A3	A2	A4
chr1	40850000	40900000	A4	B2	A3	A2	A2
chr1	40900000	40950000	A4	B2	A3	A2	A2
chr1	40950000	41000000	B4	B3	B4	A2	A2
chr1	41000000	41050000	B4	B3	B4	A2	A2
chr1	41050000	41100000	B4	B3	B4	A2	A2
chr1	41100000	41150000	B4	B3	B4	A2	A2
chr1	41150000	41200000	B4	B3	B4	A2	A2
chr1	41200000	41250000	B4	B3	B4	A2	A1
chr1	41250000	41300000	B4	B4	B4	A2	A1
chr1	41300000	41350000	B4	B4	B4	A2	A1
chr1	41350000	41400000	B4	B4	B4	A2	A1
chr1	41400000	41450000	B4	B4	B4	A2	A1
chr1	41450000	41500000	B4	B4	B4	A2	A1
chr1	41500000	41550000	B4	B4	B4	A2	A2
chr1	41550000	41600000	B4	B4	B4	A2	A2
chr1	41600000	41650000	B4	B4	B4	A2	A2
chr1	41650000	41700000	B4	B4	B4	A2	A1
chr1	41700000	41750000	B4	B4	B4	A2	A1
chr1	41750000	41800000	B4	B4	B4	A2	A1
chr1	41800000	41850000	B4	B4	B4	A2	A1
chr1	41850000	41900000	B4	B3	B4	A2	A1
chr1	41900000	41950000	B4	B3	B4	A2	A1
chr1	41950000	42000000	B4	B3	B4	A2	A1
chr1	42000000	42050000	B4	B3	B4	A2	A1
chr1	42050000	42100000	B4	B3	B4	A2	A1
chr1	42100000	42150000	B4	B3	B4	A2	A1
chr1	42150000	42200000	B4	B3	B4	A2	A1
chr1	42200000	42250000	B3	B3	B4	A2	A1
chr1	42250000	42300000	B3	B3	B4	A2	A1
chr1	42300000	42350000	B3	B3	B4	A2	A1
chr1	42350000	42400000	B3	B3	B4	A2	A1
chr1	42400000	42450000	B3	B3	B4	A2	A1
chr1	42450000	42500000	B3	B2	B4	A1	A1
chr1	42500000	42550000	B3	B2	B4	A1	A1
chr1	42550000	42600000	B3	B2	B4	A1	A1
chr1	42600000	42650000	B3	B2	B4	A1	A1
chr1	42650000	42700000	B3	B2	B4	A1	A1
chr1	42700000	42750000	B3	A3	B1	A1	A1
chr1	42750000	42800000	B3	A3	B1	A1	A1
chr1	42800000	42850000	B3	A3	B1	A1	A2
chr1	42850000	42900000	A3	A3	B1	A1	A2
chr1	42900000	42950000	A3	A3	B1	A1	A2
chr1	42950000	43000000	A3	A3	B1	A1	A2
chr1	43000000	43050000	A3	A3	B1	A1	A2
chr1	43050000	43100000	A3	A3	B1	A1	A2
chr1	43100000	43150000	A1	A3	A3	A1	A2
chr1	43150000	43200000	A1	A3	A3	A1	A2
chr1	43200000	43250000	A1	A3	A4	A3	A3
chr1	43250000	43300000	A1	A3	A4	A3	A3
chr1	43300000	43350000	A1	A3	A4	A3	A3
chr1	43350000	43400000	A1	A4	A4	A3	A3
chr1	43400000	43450000	A1	A4	A4	A3	A2
chr1	43450000	43500000	A1	A4	A2	A2	A2
chr1	43500000	43550000	A1	A4	A2	A2	A2
chr1	43550000	43600000	A1	A4	A2	A2	A2
chr1	43600000	43650000	A1	A4	A2	A2	A2
chr1	43650000	43700000	A1	A4	A4	A2	A2
chr1	43700000	43750000	A1	A4	A4	A2	A2
chr1	43750000	43800000	A1	A4	A4	A2	A2
chr1	43800000	43850000	A1	A1	A4	A2	A2
chr1	43850000	43900000	A1	A1	A1	A2	A2
chr1	43900000	43950000	A1	A1	A1	A2	A2
chr1	43950000	44000000	A1	A1	A1	A2	A2
chr1	44000000	44050000	A1	A1	A1	A2	A2
chr1	44050000	44100000	A1	A1	A1	A2	A2
chr1	44100000	44150000	A1	A1	A2	A2	A2
chr1	44150000	44200000	A1	A1	A2	A2	A2
chr1	44200000	44250000	A1	A1	A2	B4	A2
chr1	44250000	44300000	B3	B1	B3	B4	B3
chr1	44300000	44350000	B3	B1	B3	B4	B3
chr1	44350000	44400000	B3	B1	B3	B4	B3
chr1	44400000	44450000	B3	B1	B3	B4	NA
chr1	44450000	44500000	B3	B1	B3	B4	B3
chr1	44500000	44550000	B3	B1	B3	B4	B3
chr1	44550000	44600000	B3	B1	B3	B4	B3
chr1	44600000	44650000	B3	B1	B3	B4	B3
chr1	44650000	44700000	B4	B1	B3	B4	B3
chr1	44700000	44750000	B4	B1	B3	B4	B3
chr1	44750000	44800000	B4	B1	B4	B4	B3
chr1	44800000	44850000	B4	B4	B4	B4	B3
chr1	44850000	44900000	B4	B4	B4	B4	B4	Common_B4
chr1	44900000	44950000	B4	B4	B4	B4	B4	Common_B4
chr1	44950000	45000000	B4	B4	B4	B4	B4	Common_B4
chr1	45000000	45050000	B4	B4	B4	B4	B4	Common_B4
chr1	45050000	45100000	B4	B4	B4	B4	B4	Common_B4
chr1	45100000	45150000	B4	B4	B4	B4	B4	Common_B4
chr1	45150000	45200000	B4	B4	B4	B4	B4	Common_B4
chr1	45200000	45250000	B4	B4	B4	B4	B4	Common_B4
chr1	45250000	45300000	B4	B2	B4	B4	B4
chr1	45300000	45350000	B4	B2	B4	B4	B4
chr1	45350000	45400000	B4	B2	B4	B4	B3
chr1	45400000	45450000	B4	B2	B4	B4	B3
chr1	45450000	45500000	B4	B2	B4	B4	B3
chr1	45500000	45550000	B4	B2	B4	B4	B3
chr1	45550000	45600000	B4	B2	B4	B4	B3
chr1	45600000	45650000	B4	B2	B4	B4	B4
chr1	45650000	45700000	B4	B2	B4	B4	B4
chr1	45700000	45750000	B4	B2	B4	B4	B4
chr1	45750000	45800000	B4	B2	B4	B4	B4
chr1	45800000	45850000	A4	B2	B4	B3	B2
chr1	45850000	45900000	A4	A3	A2	B3	B2
chr1	45900000	45950000	A4	A3	A2	B3	B2
chr1	45950000	46000000	B4	A3	A2	B3	B2
chr1	46000000	46050000	B4	B3	B3	B3	B3
chr1	46050000	46100000	B4	B3	B3	B3	B3
chr1	46100000	46150000	B4	B3	B3	B3	B3
chr1	46150000	46200000	B4	B3	B3	B4	B3
chr1	46200000	46250000	B4	B3	B3	B4	B3
chr1	46250000	46300000	B4	B3	B3	B4	B3
chr1	46300000	46350000	B4	B3	B3	B4	B3
chr1	46350000	46400000	B4	B3	B3	B4	B3
chr1	46400000	46450000	B3	B3	B3	B4	B3
chr1	46450000	46500000	B3	B3	B3	B3	B3
chr1	46500000	46550000	B3	B3	B3	B3	B3
chr1	46550000	46600000	B3	B3	B3	B4	B3
chr1	46600000	46650000	B3	A4	B3	B4	B3
chr1	46650000	46700000	B3	A4	B3	B4	B3
chr1	46700000	46750000	B3	A4	B3	B4	B3
chr1	46750000	46800000	B3	A4	B3	B4	B3
chr1	46800000	46850000	B3	A4	B3	B2	A4
chr1	46850000	46900000	A3	A4	A2	B2	A4
chr1	46900000	46950000	A3	A4	A2	B2	A4
chr1	46950000	47000000	A3	A4	A2	B3	B2
chr1	47000000	47050000	A3	B1	A2	B3	B2
chr1	47050000	47100000	B4	B1	B4	B3	B2
chr1	47100000	47150000	B4	B1	B4	B3	B2
chr1	47150000	47200000	B4	B1	B4	B3	B2
chr1	47200000	47250000	B4	B1	B4	B3	B2
chr1	47250000	47300000	B4	B3	B4	B3	B2
chr1	47300000	47350000	B4	B3	B4	B2	B2
chr1	47350000	47400000	B4	B3	B4	B2	B2
chr1	47400000	47450000	B4	B4	B4	B2	B2
chr1	47450000	47500000	B4	B4	B4	B3	B2
chr1	47500000	47550000	B4	B4	B4	B3	B2
chr1	47550000	47600000	B4	B4	B4	B3	B4
chr1	47600000	47650000	B4	B4	B4	B3	B4
chr1	47650000	47700000	B4	B4	B4	B3	B4
chr1	47700000	47750000	B4	B4	B4	B3	B4
chr1	47750000	47800000	B4	B3	B4	B3	B4
chr1	47800000	47850000	B4	B3	B4	B3	B4
chr1	47850000	47900000	B4	B3	B4	B3	B4
chr1	47900000	47950000	B4	B3	B4	B3	B4
chr1	47950000	48000000	B4	B3	B4	B3	B4
chr1	48000000	48050000	B4	B4	B4	B3	B4
chr1	48050000	48100000	B4	B4	B4	B3	B4
chr1	48100000	48150000	B4	B4	B4	B3	B4
chr1	48150000	48200000	B4	B4	B4	B3	B4
chr1	48200000	48250000	B4	B4	B4	B3	B4
chr1	48250000	48300000	B4	B4	B4	B3	B4
chr1	48300000	48350000	B4	B4	B4	B3	B4
chr1	48350000	48400000	B4	B4	B4	B3	B4
chr1	48400000	48450000	B4	B4	B4	B4	B4	Common_B4
chr1	48450000	48500000	B4	B4	B4	B4	B4	Common_B4
chr1	48500000	48550000	B4	B4	B4	B4	B4	Common_B4
chr1	48550000	48600000	B4	B4	B4	B4	B4	Common_B4
chr1	48600000	48650000	B4	B2	B4	B4	B4
chr1	48650000	48700000	B4	B2	B4	B4	B4
chr1	48700000	48750000	B4	B2	B4	B4	B4
chr1	48750000	48800000	B4	B2	B4	B4	B4
chr1	48800000	48850000	B4	B4	B4	B4	B4	Common_B4
chr1	48850000	48900000	B4	B4	B4	B4	B4	Common_B4
chr1	48900000	48950000	B4	B4	B4	B4	B4	Common_B4
chr1	48950000	49000000	B4	B4	B4	B4	B4	Common_B4
chr1	49000000	49050000	B4	B4	B4	B4	B4	Common_B4
chr1	49050000	49100000	B4	B4	B4	B4	B4	Common_B4
chr1	49100000	49150000	B4	B4	B4	B4	B4	Common_B4
chr1	49150000	49200000	B4	B4	B4	B4	B4	Common_B4
chr1	49200000	49250000	B4	B4	B4	B4	B4	Common_B4
chr1	49250000	49300000	B4	B4	B4	B4	B4	Common_B4
chr1	49300000	49350000	B4	B4	B4	B4	B4	Common_B4
chr1	49350000	49400000	B4	B4	B4	B4	B4	Common_B4
chr1	49400000	49450000	B4	B4	B4	B4	B4	Common_B4
chr1	49450000	49500000	B4	B4	B4	B4	B4	Common_B4
chr1	49500000	49550000	B4	B4	B4	B4	B4	Common_B4
chr1	49550000	49600000	B4	B4	B4	B4	B4	Common_B4
chr1	49600000	49650000	B4	B4	B4	B4	B4	Common_B4
chr1	49650000	49700000	B4	B4	B4	B4	B4	Common_B4
chr1	49700000	49750000	B4	B4	B4	B4	B4	Common_B4
chr1	49750000	49800000	B4	B4	B4	B4	B4	Common_B4
chr1	49800000	49850000	B4	B4	B3	B4	B4
chr1	49850000	49900000	B4	B4	B3	B4	B4
chr1	49900000	49950000	B4	B3	B3	B4	B4
chr1	49950000	50000000	B4	B3	B4	B4	B4
chr1	50000000	50050000	B4	B3	B4	B4	B4
chr1	50050000	50100000	B4	B3	B4	B4	B4
chr1	50100000	50150000	B4	B4	B4	B4	B4	Common_B4
chr1	50150000	50200000	B4	B4	B4	B4	B4	Common_B4
chr1	50200000	50250000	B4	B4	B4	B4	B4	Common_B4
chr1	50250000	50300000	B4	B4	B4	B4	B4	Common_B4
chr1	50300000	50350000	B4	B4	B4	B4	B4	Common_B4
chr1	50350000	50400000	B4	B4	B4	B4	B4	Common_B4
chr1	50400000	50450000	B4	B4	B4	B4	B4	Common_B4
chr1	50450000	50500000	B4	B4	B4	B4	B4	Common_B4
chr1	50500000	50550000	B4	B4	B4	B4	B4	Common_B4
chr1	50550000	50600000	B4	B4	B4	B4	B4	Common_B4
chr1	50600000	50650000	B4	B4	B4	B4	B4	Common_B4
chr1	50650000	50700000	B4	B1	B4	B4	B3
chr1	50700000	50750000	B4	B1	B4	B4	B3
chr1	50750000	50800000	B4	B1	B4	B4	B3
chr1	50800000	50850000	B4	B3	B4	B4	B3
chr1	50850000	50900000	B4	B3	B4	B4	B3
chr1	50900000	50950000	B4	B3	B4	B1	B3
chr1	50950000	51000000	A3	B1	B3	B1	B1
chr1	51000000	51050000	A3	B1	B3	B1	B1
chr1	51050000	51100000	A3	B2	B3	B1	B1
chr1	51100000	51150000	A3	B2	B3	B1	B1
chr1	51150000	51200000	A3	B2	B3	B1	B1
chr1	51200000	51250000	A3	B2	B3	B1	B1
chr1	51250000	51300000	A3	B2	B3	B1	B1
chr1	51300000	51350000	A3	B2	B3	B1	B1
chr1	51350000	51400000	A3	B2	B3	B1	B1
chr1	51400000	51450000	A3	B2	B3	B1	B1
chr1	51450000	51500000	A3	B2	B3	B1	B1
chr1	51500000	51550000	A1	A2	A2	A3	A3
chr1	51550000	51600000	A1	A2	A2	A3	A3
chr1	51600000	51650000	A1	A2	A2	A3	A3
chr1	51650000	51700000	A1	A2	A2	A3	A1
chr1	51700000	51750000	A4	A2	A2	A2	A1
chr1	51750000	51800000	A4	A2	A2	A2	A1
chr1	51800000	51850000	A4	A2	A2	A2	A1
chr1	51850000	51900000	A4	A2	A2	A2	A1
chr1	51900000	51950000	A4	A2	A2	A2	A1
chr1	51950000	52000000	A4	A2	A2	A2	A1
chr1	52000000	52050000	A4	A2	A2	A3	A2
chr1	52050000	52100000	A1	A2	A2	A3	A2
chr1	52100000	52150000	A1	A2	A2	A3	A2
chr1	52150000	52200000	A1	A1	A1	A2	A2
chr1	52200000	52250000	A1	A1	A1	A2	A2
chr1	52250000	52300000	A1	A1	A1	A2	A2
chr1	52300000	52350000	A1	A3	A2	A2	A2
chr1	52350000	52400000	A2	A3	A2	A4	A4
chr1	52400000	52450000	A2	A3	A2	A4	A4
chr1	52450000	52500000	A2	A3	A2	A4	A4
chr1	52500000	52550000	A1	A3	A2	A3	A4
chr1	52550000	52600000	A1	A3	A2	A3	A3
chr1	52600000	52650000	A1	A3	A2	A3	A3
chr1	52650000	52700000	A1	A3	A2	A3	A3
chr1	52700000	52750000	A1	A3	A1	A3	A3
chr1	52750000	52800000	A1	A3	A1	A3	A3
chr1	52800000	52850000	A1	A3	A1	A4	A3
chr1	52850000	52900000	A1	A2	A1	A4	A3
chr1	52900000	52950000	A1	A2	A1	B2	A3
chr1	52950000	53000000	A3	A2	B1	B2	B2
chr1	53000000	53050000	A3	A2	B1	B2	B2
chr1	53050000	53100000	A3	A4	B1	B2	B2
chr1	53100000	53150000	A3	A4	B1	B2	B2
chr1	53150000	53200000	A3	A4	B1	B2	B2
chr1	53200000	53250000	A3	A4	B1	B2	B2
chr1	53250000	53300000	A3	A3	B1	B2	B2
chr1	53300000	53350000	A2	A3	A3	B2	A4
chr1	53350000	53400000	A2	A3	A3	B2	A4
chr1	53400000	53450000	A2	A3	A3	B2	A4
chr1	53450000	53500000	A4	B1	B2	B4	A4
chr1	53500000	53550000	A4	B1	B2	B4	B3
chr1	53550000	53600000	A4	B1	B2	B4	B3
chr1	53600000	53650000	A4	B1	B2	B4	B3
chr1	53650000	53700000	A4	B1	B2	B4	B3
chr1	53700000	53750000	A4	B1	B2	B4	B3
chr1	53750000	53800000	A1	A2	A1	B3	A4
chr1	53800000	53850000	A1	A2	A1	B3	A4
chr1	53850000	53900000	A1	A2	A1	B3	A4
chr1	53900000	53950000	A1	A2	A1	B3	A4
chr1	53950000	54000000	A1	A4	A4	B3	A4
chr1	54000000	54050000	A3	A4	A4	B3	B2
chr1	54050000	54100000	A3	A4	A4	B3	B2
chr1	54100000	54150000	A3	A4	A4	B3	B2
chr1	54150000	54200000	A3	A4	A4	B3	B2
chr1	54200000	54250000	A3	A4	A4	B2	B1
chr1	54250000	54300000	A3	A4	A4	B2	B1
chr1	54300000	54350000	A3	A4	A4	B2	B1
chr1	54350000	54400000	A3	A4	A4	B2	B1
chr1	54400000	54450000	A3	A4	A4	B2	B1
chr1	54450000	54500000	A1	A2	A1	B2	A2
chr1	54500000	54550000	A1	A2	A1	A1	A2
chr1	54550000	54600000	A1	A2	A1	A1	A2
chr1	54600000	54650000	A1	A2	A1	A1	A2
chr1	54650000	54700000	A1	A2	A1	A1	A2
chr1	54700000	54750000	A1	A2	A1	A1	A2
chr1	54750000	54800000	A1	A2	A1	A1	A2
chr1	54800000	54850000	A1	A2	A1	A1	A1
chr1	54850000	54900000	A1	A2	A1	A1	A1
chr1	54900000	54950000	A1	A2	A1	A1	A1
chr1	54950000	55000000	A1	A2	A1	A1	A1
chr1	55000000	55050000	A1	A1	A1	A1	A1	Common_A1
chr1	55050000	55100000	A1	A1	A1	A1	A1	Common_A1
chr1	55100000	55150000	A1	A1	A1	A1	A1	Common_A1
chr1	55150000	55200000	A1	A1	A1	A1	A1	Common_A1
chr1	55200000	55250000	A1	A1	A2	A1	A1
chr1	55250000	55300000	A1	A2	A2	A1	A1
chr1	55300000	55350000	A1	A2	A3	A4	A3
chr1	55350000	55400000	A1	A2	A3	A4	A3
chr1	55400000	55450000	A1	A2	A3	A4	A3
chr1	55450000	55500000	A1	B2	A2	A3	A3
chr1	55500000	55550000	A1	B2	A2	A3	A3
chr1	55550000	55600000	A1	B2	A2	A3	A3
chr1	55600000	55650000	A3	B2	A3	A3	A3
chr1	55650000	55700000	A3	B2	A3	A3	A3
chr1	55700000	55750000	A3	B2	A3	A3	A3
chr1	55750000	55800000	A3	B2	A3	A3	A3
chr1	55800000	55850000	A3	B2	A3	A3	A3
chr1	55850000	55900000	A3	B2	A3	A3	A3
chr1	55900000	55950000	A3	B2	A3	A3	A3
chr1	55950000	56000000	B3	B2	A3	A3	A3
chr1	56000000	56050000	B3	B2	B1	A3	A3
chr1	56050000	56100000	B3	B4	B1	A3	B2
chr1	56100000	56150000	B3	B4	B1	A3	B2
chr1	56150000	56200000	B3	B4	B1	A3	B2
chr1	56200000	56250000	B3	B4	B1	A3	B2
chr1	56250000	56300000	B3	B4	B3	A3	B2
chr1	56300000	56350000	B3	B4	B3	A3	B2
chr1	56350000	56400000	B4	B4	B3	A3	B2
chr1	56400000	56450000	B4	B3	B3	A3	B2
chr1	56450000	56500000	B4	B3	B3	A3	B2
chr1	56500000	56550000	B4	B3	B3	A3	B2
chr1	56550000	56600000	B4	B3	B3	A3	B2
chr1	56600000	56650000	B4	B3	B3	A3	B2
chr1	56650000	56700000	B4	B3	B1	A3	B2
chr1	56700000	56750000	B4	B1	B1	A3	B2
chr1	56750000	56800000	B4	B1	B1	A3	B2
chr1	56800000	56850000	B4	B1	B1	A3	B2
chr1	56850000	56900000	B4	B1	B1	A3	A4
chr1	56900000	56950000	B2	B1	B1	A2	A4
chr1	56950000	57000000	B2	A4	B1	A2	A3
chr1	57000000	57050000	B2	A4	B1	A2	A3
chr1	57050000	57100000	B2	A4	B3	A2	A3
chr1	57100000	57150000	B2	B2	B3	A2	A3
chr1	57150000	57200000	B2	B2	B3	A2	A3
chr1	57200000	57250000	B2	B2	B3	A2	A3
chr1	57250000	57300000	B2	B2	B3	A2	A3
chr1	57300000	57350000	B2	B2	B3	A2	A3
chr1	57350000	57400000	A2	A2	A3	A2	A2
chr1	57400000	57450000	A2	A2	A3	A2	A2
chr1	57450000	57500000	A2	A2	A3	A1	A2
chr1	57500000	57550000	A2	A2	A3	A1	A4
chr1	57550000	57600000	A2	A4	B2	A1	A4
chr1	57600000	57650000	A2	A4	B2	A1	A4
chr1	57650000	57700000	A2	A4	B2	A1	A4
chr1	57700000	57750000	A2	A4	B2	A1	A4
chr1	57750000	57800000	A2	A4	B2	A1	A4
chr1	57800000	57850000	A1	A4	B2	A1	A2
chr1	57850000	57900000	A1	A4	B2	A1	A2
chr1	57900000	57950000	A1	A4	B2	A1	A2
chr1	57950000	58000000	A1	A4	B2	A1	A2
chr1	58000000	58050000	A1	A2	A2	A1	A2
chr1	58050000	58100000	A1	A2	A2	A1	A2
chr1	58100000	58150000	A3	A2	A4	A2	A3
chr1	58150000	58200000	A3	A2	A4	A2	A3
chr1	58200000	58250000	A3	A2	A4	A2	A3
chr1	58250000	58300000	A3	A2	A4	A2	A3
chr1	58300000	58350000	A3	A2	A4	A2	A3
chr1	58350000	58400000	A1	A2	A1	A2	A3
chr1	58400000	58450000	A1	A1	A1	A2	A3
chr1	58450000	58500000	A1	A1	A1	A2	A1
chr1	58500000	58550000	A1	A1	A1	A2	A1
chr1	58550000	58600000	A1	A1	A1	A2	A1
chr1	58600000	58650000	A1	A2	A1	A3	A2
chr1	58650000	58700000	A1	A2	A1	A3	A2
chr1	58700000	58750000	A1	A2	A1	A3	A2
chr1	58750000	58800000	A1	A2	A1	A3	A2
chr1	58800000	58850000	A1	A2	A1	A4	A2
chr1	58850000	58900000	A1	A2	A1	A4	A4
chr1	58900000	58950000	A1	A2	A1	A4	A4
chr1	58950000	59000000	A1	A1	A1	A4	A4
chr1	59000000	59050000	A2	A1	A1	A3	A2
chr1	59050000	59100000	A2	A1	A2	A3	A2
chr1	59100000	59150000	A2	A1	A2	A3	A2
chr1	59150000	59200000	A1	A1	A2	A1	A2
chr1	59200000	59250000	A1	A1	A2	A1	A2
chr1	59250000	59300000	A1	A1	A2	A1	A1
chr1	59300000	59350000	A1	A1	A2	A1	A1
chr1	59350000	59400000	A3	A1	A2	A1	A1
chr1	59400000	59450000	A3	A1	A2	A1	A1
chr1	59450000	59500000	A3	A1	A2	A1	A1
chr1	59500000	59550000	A3	A1	A2	A1	A1
chr1	59550000	59600000	A2	A1	A2	A1	A1
chr1	59600000	59650000	A2	A1	A2	A1	A1
chr1	59650000	59700000	A1	A1	A2	A1	A1
chr1	59700000	59750000	A1	A1	A1	A1	A1	Common_A1
chr1	59750000	59800000	A1	A1	A1	A1	A1	Common_A1
chr1	59800000	59850000	A1	A1	A1	A1	A1	Common_A1
chr1	59850000	59900000	A1	A1	A1	A1	A1	Common_A1
chr1	59900000	59950000	A1	A1	A1	A1	A1	Common_A1
chr1	59950000	60000000	A1	A1	A1	A1	A1	Common_A1
chr1	60000000	60050000	A1	A1	A1	A1	A1	Common_A1
chr1	60050000	60100000	A1	A1	A1	A1	A1	Common_A1
chr1	60100000	60150000	A1	A1	A1	A1	A1	Common_A1
chr1	60150000	60200000	A1	A1	A1	A1	A1	Common_A1
chr1	60200000	60250000	A1	A1	A1	A1	A1	Common_A1
chr1	60250000	60300000	A1	A1	A1	A1	A1	Common_A1
chr1	60300000	60350000	A1	A1	A1	A1	A1	Common_A1
chr1	60350000	60400000	A1	A1	A1	A1	A1	Common_A1
chr1	60400000	60450000	A1	A1	A1	A1	A1	Common_A1
chr1	60450000	60500000	A1	A1	A1	A1	A1	Common_A1
chr1	60500000	60550000	A1	A1	A1	A1	A1	Common_A1
chr1	60550000	60600000	A1	A1	A1	A1	A1	Common_A1
chr1	60600000	60650000	A1	A1	A1	A3	A1
chr1	60650000	60700000	A1	A4	A1	A3	A4
chr1	60700000	60750000	A1	A4	A1	A3	A4
chr1	60750000	60800000	A1	A4	A1	A3	A4
chr1	60800000	60850000	A1	A2	A1	A3	A4
chr1	60850000	60900000	A1	A2	A1	A3	A4
chr1	60900000	60950000	A1	A2	A1	A1	A3
chr1	60950000	61000000	A1	A2	A1	A1	A3
chr1	61000000	61050000	A1	B2	A1	A1	A3
chr1	61050000	61100000	A1	B2	B2	A1	A3
chr1	61100000	61150000	A1	B2	B2	A1	A3
chr1	61150000	61200000	A1	B2	B2	A1	A1
chr1	61200000	61250000	A1	B2	B2	A1	A1
chr1	61250000	61300000	B1	B2	B2	A1	A1
chr1	61300000	61350000	B1	B2	B2	A1	A1
chr1	61350000	61400000	B1	B2	B2	A1	A1
chr1	61400000	61450000	B1	B2	B2	A1	A1
chr1	61450000	61500000	B2	B1	B2	A1	A2
chr1	61500000	61550000	B2	B1	B2	A1	A2
chr1	61550000	61600000	B2	B1	B2	A1	A2
chr1	61600000	61650000	B2	B1	B2	A1	A2
chr1	61650000	61700000	B2	B1	A4	A1	A2
chr1	61700000	61750000	B1	B3	A4	A1	A2
chr1	61750000	61800000	B1	B3	A4	A1	A2
chr1	61800000	61850000	B1	B3	B1	A1	A2
chr1	61850000	61900000	B1	B3	B1	A1	A2
chr1	61900000	61950000	B1	B3	B1	A1	A2
chr1	61950000	62000000	B1	B3	B1	A1	A1
chr1	62000000	62050000	B1	B2	B1	A1	A1
chr1	62050000	62100000	B1	B2	B1	A1	A1
chr1	62100000	62150000	B1	B2	B1	A2	A1
chr1	62150000	62200000	B1	B1	B1	A2	A1
chr1	62200000	62250000	B1	B1	A3	A2	A1
chr1	62250000	62300000	B1	B1	A3	A1	A1
chr1	62300000	62350000	B1	B1	A3	A1	A1
chr1	62350000	62400000	B1	B1	A4	A1	A1
chr1	62400000	62450000	B1	B1	A4	A1	A1
chr1	62450000	62500000	B1	B1	A4	A1	A1
chr1	62500000	62550000	B1	B1	A4	A1	A1
chr1	62550000	62600000	B1	B1	A4	A1	A1
chr1	62600000	62650000	B1	B1	A4	A1	A2
chr1	62650000	62700000	B1	B1	A4	A1	A2
chr1	62700000	62750000	B1	A1	A2	A1	A2
chr1	62750000	62800000	B1	A1	A2	A1	A1
chr1	62800000	62850000	A4	A1	A2	A1	A1
chr1	62850000	62900000	A4	A1	A2	A1	A1
chr1	62900000	62950000	A4	A1	B1	A1	A1
chr1	62950000	63000000	A4	A1	B1	A1	A1
chr1	63000000	63050000	A4	A1	B1	A1	A1
chr1	63050000	63100000	A4	A1	B1	A1	A1
chr1	63100000	63150000	A1	A1	A2	A1	A1
chr1	63150000	63200000	A1	A1	A2	A1	A1
chr1	63200000	63250000	A1	A1	A2	A1	A1
chr1	63250000	63300000	B2	A1	B3	A1	A1
chr1	63300000	63350000	B2	A1	B3	A2	A1
chr1	63350000	63400000	B2	A1	B3	A2	A2
chr1	63400000	63450000	B2	A1	B3	A2	A2
chr1	63450000	63500000	B2	A1	B3	A2	A2
chr1	63500000	63550000	B2	A1	B3	A2	A2
chr1	63550000	63600000	B2	A1	B3	A2	A2
chr1	63600000	63650000	B2	A1	B3	A2	A2
chr1	63650000	63700000	A3	A3	B3	A2	A3
chr1	63700000	63750000	A3	A3	A4	A2	A3
chr1	63750000	63800000	A3	A3	A4	A2	A2
chr1	63800000	63850000	A3	A3	A4	A2	A2
chr1	63850000	63900000	A3	A3	A4	A2	A2
chr1	63900000	63950000	A3	A3	A4	A2	A2
chr1	63950000	64000000	A3	A3	A4	A2	A2
chr1	64000000	64050000	A1	A3	A4	A2	A1
chr1	64050000	64100000	A1	A2	A1	A2	A1
chr1	64100000	64150000	A1	A2	A1	A2	A1
chr1	64150000	64200000	A1	A2	A1	A2	A1
chr1	64200000	64250000	A2	A2	A1	A2	A2
chr1	64250000	64300000	A2	A2	A1	A2	A2
chr1	64300000	64350000	A2	A2	A1	A2	A2
chr1	64350000	64400000	A2	A2	A1	A2	A2
chr1	64400000	64450000	A2	A2	A1	A2	A2
chr1	64450000	64500000	A2	A2	A1	A2	A2
chr1	64500000	64550000	A1	A2	A1	A2	A2
chr1	64550000	64600000	A1	A1	A1	A2	A1
chr1	64600000	64650000	A1	A1	A1	A2	A1
chr1	64650000	64700000	A1	A1	A1	A2	A1
chr1	64700000	64750000	A1	A1	A1	A2	A1
chr1	64750000	64800000	A1	A1	A1	A2	A1
chr1	64800000	64850000	A1	A1	A1	A3	A1
chr1	64850000	64900000	A1	A1	A1	A3	A1
chr1	64900000	64950000	A1	A1	A1	A3	A1
chr1	64950000	65000000	A1	A1	A1	A3	A1
chr1	65000000	65050000	A1	A1	A1	A3	A1
chr1	65050000	65100000	A3	A1	A1	A3	A3
chr1	65100000	65150000	A3	A1	A1	A3	A3
chr1	65150000	65200000	A3	A1	A1	A3	A3
chr1	65200000	65250000	A3	A1	A1	A3	A3
chr1	65250000	65300000	A3	A1	A1	A3	A3
chr1	65300000	65350000	A3	A1	A1	A3	A3
chr1	65350000	65400000	B4	B3	B4	B4	B4
chr1	65400000	65450000	B4	B3	B4	B4	B4
chr1	65450000	65500000	B4	B3	B4	B4	B4
chr1	65500000	65550000	B4	B3	B4	B4	B4
chr1	65550000	65600000	B4	B3	B4	B4	B4
chr1	65600000	65650000	B4	B3	B4	B4	B4
chr1	65650000	65700000	B4	B3	B4	B4	B4
chr1	65700000	65750000	B4	B3	B4	B4	B4
chr1	65750000	65800000	B4	B3	B4	B4	B4
chr1	65800000	65850000	B4	B3	B4	B4	B4
chr1	65850000	65900000	B4	B3	B4	B4	B4
chr1	65900000	65950000	B4	B3	B4	B4	B4
chr1	65950000	66000000	B4	B3	B4	B4	B4
chr1	66000000	66050000	B4	B3	B4	B4	B4
chr1	66050000	66100000	B4	B3	B4	B4	B4
chr1	66100000	66150000	B4	B3	B4	B4	B4
chr1	66150000	66200000	B2	B2	B4	B4	A2
chr1	66200000	66250000	B2	B2	B1	A2	A2
chr1	66250000	66300000	B2	B2	B1	A2	A2
chr1	66300000	66350000	B2	B2	B1	A2	A2
chr1	66350000	66400000	B2	B2	B1	A2	A2
chr1	66400000	66450000	B2	B2	B2	A2	A2
chr1	66450000	66500000	B2	B2	B2	A2	A2
chr1	66500000	66550000	B2	B2	B2	B2	B1
chr1	66550000	66600000	B2	B2	B2	B2	B1
chr1	66600000	66650000	B2	B2	B2	B2	B1
chr1	66650000	66700000	B2	B2	B2	B2	B1
chr1	66700000	66750000	A1	A2	A2	A4	A3
chr1	66750000	66800000	A1	A2	A2	A4	A3
chr1	66800000	66850000	A1	A2	A2	A4	A3
chr1	66850000	66900000	A1	A2	A2	A4	A3
chr1	66900000	66950000	A4	A3	A4	B1	A4
chr1	66950000	67000000	A4	A3	A4	B1	A4
chr1	67000000	67050000	A4	A3	A4	B1	A4
chr1	67050000	67100000	A4	A3	A4	B1	A4
chr1	67100000	67150000	A4	B2	A4	B1	B2
chr1	67150000	67200000	B4	B2	B4	B1	B2
chr1	67200000	67250000	B4	B2	B4	B1	B2
chr1	67250000	67300000	B4	B2	B4	B1	B2
chr1	67300000	67350000	B4	B2	B4	B1	B2
chr1	67350000	67400000	B4	B2	B4	B2	B2
chr1	67400000	67450000	B4	B4	B4	B2	B2
chr1	67450000	67500000	B4	B4	B4	B2	B2
chr1	67500000	67550000	B4	B4	B4	B4	B2
chr1	67550000	67600000	B4	B4	B4	B4	B3
chr1	67600000	67650000	B4	B4	B4	B4	B3
chr1	67650000	67700000	B4	B4	B4	B4	B3
chr1	67700000	67750000	B4	B4	B4	B4	B3
chr1	67750000	67800000	B4	B4	B4	B4	B3
chr1	67800000	67850000	B4	B4	B4	B4	B3
chr1	67850000	67900000	B4	B4	B4	B4	B3
chr1	67900000	67950000	B4	B4	B4	B4	B3
chr1	67950000	68000000	B4	B4	B4	B4	B3
chr1	68000000	68050000	B4	B4	B4	B4	B3
chr1	68050000	68100000	B4	B4	B4	B4	B2
chr1	68100000	68150000	B4	B4	B4	B2	B2
chr1	68150000	68200000	B4	B4	B4	B2	B2
chr1	68200000	68250000	B4	B4	B4	B2	B2
chr1	68250000	68300000	B4	B4	B4	B2	B2
chr1	68300000	68350000	B4	B4	B4	B2	B2
chr1	68350000	68400000	B4	B4	B4	B2	B2
chr1	68400000	68450000	B4	B4	B4	B2	B2
chr1	68450000	68500000	B4	B4	B4	B3	B2
chr1	68500000	68550000	B4	B4	B4	B3	B2
chr1	68550000	68600000	B4	B4	B4	B3	B2
chr1	68600000	68650000	B4	B4	B4	B3	B2
chr1	68650000	68700000	B4	B4	B4	B3	B2
chr1	68700000	68750000	B4	B4	B4	B3	B1
chr1	68750000	68800000	B4	B4	B4	B3	B1
chr1	68800000	68850000	B4	B4	B4	B3	A4
chr1	68850000	68900000	B4	B4	B4	B1	A4
chr1	68900000	68950000	B4	B4	B4	B1	A4
chr1	68950000	69000000	B4	B4	B4	B1	A4
chr1	69000000	69050000	B4	B4	B4	B1	A4
chr1	69050000	69100000	B4	B4	B4	B1	A4
chr1	69100000	69150000	B4	B3	B4	B1	A4
chr1	69150000	69200000	B4	B3	B4	B1	A4
chr1	69200000	69250000	B4	B3	B4	B2	B2
chr1	69250000	69300000	A3	B3	B2	B2	B2
chr1	69300000	69350000	A3	B4	B2	B2	B2
chr1	69350000	69400000	A3	B4	B2	B2	B2
chr1	69400000	69450000	A3	B4	B2	B2	B2
chr1	69450000	69500000	A3	B4	B2	B2	B2
chr1	69500000	69550000	A3	B4	B2	B2	B1
chr1	69550000	69600000	A1	B4	B2	B2	B1
chr1	69600000	69650000	A1	B4	B2	B2	B1
chr1	69650000	69700000	A1	B4	B2	B2	B1
chr1	69700000	69750000	A1	B2	B2	B2	B1
chr1	69750000	69800000	A1	B2	B2	B2	B1
chr1	69800000	69850000	A1	B2	B2	B2	B1
chr1	69850000	69900000	B2	B2	B4	B2	B3
chr1	69900000	69950000	B2	B2	B4	B3	B3
chr1	69950000	70000000	B2	B4	B4	B3	B3
chr1	70000000	70050000	B2	B4	B4	B3	B3
chr1	70050000	70100000	B2	B4	B4	B3	B3
chr1	70100000	70150000	B2	B4	B4	B3	B3
chr1	70150000	70200000	B2	B4	B4	B3	B3
chr1	70200000	70250000	B2	B4	B4	B3	B3
chr1	70250000	70300000	B2	B3	B4	B3	B3
chr1	70300000	70350000	B2	B3	B4	B3	B3
chr1	70350000	70400000	B3	B3	B4	B2	B3
chr1	70400000	70450000	B3	B4	B4	B2	B3
chr1	70450000	70500000	B3	B4	B4	B2	B3
chr1	70500000	70550000	B3	B4	B4	B2	B3
chr1	70550000	70600000	B3	B4	B4	B2	B3
chr1	70600000	70650000	B3	B4	B4	B2	B4
chr1	70650000	70700000	B3	B4	B4	B2	B4
chr1	70700000	70750000	B3	B4	B4	B2	B4
chr1	70750000	70800000	B3	B4	B4	B2	B4
chr1	70800000	70850000	B3	B3	B2	B1	B4
chr1	70850000	70900000	B3	B3	B2	B1	B4
chr1	70900000	70950000	B3	B3	B2	B1	B4
chr1	70950000	71000000	B3	B3	B2	B1	B4
chr1	71000000	71050000	B3	B3	B2	B1	B4
chr1	71050000	71100000	A2	A3	A3	B1	B2
chr1	71100000	71150000	A2	A3	A3	B1	B2
chr1	71150000	71200000	A2	A3	A3	B2	B2
chr1	71200000	71250000	B2	B2	B3	B2	B2
chr1	71250000	71300000	B2	B2	B3	B2	B2
chr1	71300000	71350000	B2	B2	B3	B1	B1
chr1	71350000	71400000	B2	B2	B3	B1	B1
chr1	71400000	71450000	B2	B2	B3	B1	B1
chr1	71450000	71500000	B2	B2	B3	B1	B1
chr1	71500000	71550000	B2	B2	B3	B1	B1
chr1	71550000	71600000	A4	A1	A3	B1	B1
chr1	71600000	71650000	A4	A1	A3	A3	A3
chr1	71650000	71700000	A4	A1	A3	A3	A3
chr1	71700000	71750000	B3	A1	A3	A3	A3
chr1	71750000	71800000	B3	A4	A3	A3	A4
chr1	71800000	71850000	B3	A4	A3	A3	A4
chr1	71850000	71900000	B3	A4	A3	A3	A4
chr1	71900000	71950000	B3	A4	A3	A3	A4
chr1	71950000	72000000	B3	A4	A3	A3	A4
chr1	72000000	72050000	B3	A4	A3	A3	A4
chr1	72050000	72100000	B3	A4	A3	A3	A4
chr1	72100000	72150000	B3	A4	A3	A3	A4
chr1	72150000	72200000	B3	A4	A3	A3	A4
chr1	72200000	72250000	B3	A1	A3	A3	A4
chr1	72250000	72300000	A2	A1	A3	A3	A1
chr1	72300000	72350000	A2	A1	A3	A1	A1
chr1	72350000	72400000	A2	A1	A3	A1	A1
chr1	72400000	72450000	B1	A1	B2	A1	A1
chr1	72450000	72500000	B1	A2	B2	A1	A2
chr1	72500000	72550000	B1	A2	B2	A1	A2
chr1	72550000	72600000	B1	A2	B2	A1	A2
chr1	72600000	72650000	A3	A1	A4	A1	A1
chr1	72650000	72700000	A3	A1	A4	A1	A1
chr1	72700000	72750000	A3	A1	A4	A2	A1
chr1	72750000	72800000	A3	A1	A4	A2	A1
chr1	72800000	72850000	B4	A1	B4	A2	A1
chr1	72850000	72900000	B4	A1	B4	A2	A1
chr1	72900000	72950000	B4	B2	B4	B3	A4
chr1	72950000	73000000	B4	B2	B4	B3	A4
chr1	73000000	73050000	B4	B2	B4	B3	A4
chr1	73050000	73100000	B4	B2	B4	B3	A4
chr1	73100000	73150000	B4	B2	B4	B3	A4
chr1	73150000	73200000	B4	B2	B4	B3	A4
chr1	73200000	73250000	B4	B2	B4	B3	A4
chr1	73250000	73300000	B4	B2	B4	B3	A4
chr1	73300000	73350000	B4	B2	B4	B3	A4
chr1	73350000	73400000	B4	B2	B4	B3	A4
chr1	73400000	73450000	B4	B2	B4	B4	A4
chr1	73450000	73500000	B4	B2	B4	B4	A4
chr1	73500000	73550000	B4	B2	B4	B4	A4
chr1	73550000	73600000	B4	B2	B4	B4	A4
chr1	73600000	73650000	B4	B2	B4	B4	A4
chr1	73650000	73700000	B4	B2	B4	B4	A4
chr1	73700000	73750000	B4	B2	B4	B4	A4
chr1	73750000	73800000	B4	B2	B4	B4	A4
chr1	73800000	73850000	B4	B2	B4	B4	A4
chr1	73850000	73900000	B4	B2	B4	B4	A4
chr1	73900000	73950000	A2	A1	A2	A2	A1
chr1	73950000	74000000	A2	A1	A2	A2	A1
chr1	74000000	74050000	A2	A1	A2	A2	A1
chr1	74050000	74100000	A2	A1	A2	A2	A1
chr1	74100000	74150000	A2	A1	A2	A2	A1
chr1	74150000	74200000	A2	A1	A2	A2	A1
chr1	74200000	74250000	A2	A1	A2	A2	A1
chr1	74250000	74300000	A1	A1	A1	A1	A1	Common_A1
chr1	74300000	74350000	A1	A1	A1	A1	A1	Common_A1
chr1	74350000	74400000	A1	A1	A1	A1	A1	Common_A1
chr1	74400000	74450000	A1	A1	A1	A1	A1	Common_A1
chr1	74450000	74500000	A1	A1	A1	A1	A1	Common_A1
chr1	74500000	74550000	A1	A1	A1	A1	A1	Common_A1
chr1	74550000	74600000	A1	A1	A1	A1	A1	Common_A1
chr1	74600000	74650000	A1	A1	A1	A1	A1	Common_A1
chr1	74650000	74700000	A2	A1	A1	A1	A1
chr1	74700000	74750000	A2	A1	A1	A1	A1
chr1	74750000	74800000	A2	A1	A1	A1	A1
chr1	74800000	74850000	A2	A1	A1	A1	A1
chr1	74850000	74900000	A2	A1	A1	A1	A1
chr1	74900000	74950000	A4	A1	A2	A1	A1
chr1	74950000	75000000	A4	A1	A2	A1	A1
chr1	75000000	75050000	A4	A1	A2	A1	A1
chr1	75050000	75100000	A4	A1	A2	A1	A1
chr1	75100000	75150000	A1	A1	A1	A1	A1	Common_A1
chr1	75150000	75200000	A1	A1	A1	A1	A1	Common_A1
chr1	75200000	75250000	A1	A1	A1	A1	A1	Common_A1
chr1	75250000	75300000	A2	A1	A2	A1	A1
chr1	75300000	75350000	A2	A1	A2	A1	A1
chr1	75350000	75400000	A2	A1	A2	A1	A1
chr1	75400000	75450000	A2	A1	A2	A1	A1
chr1	75450000	75500000	A2	A1	A2	A1	A1
chr1	75500000	75550000	A2	A1	A2	A1	A1
chr1	75550000	75600000	A2	A1	A2	A1	A1
chr1	75600000	75650000	B4	B1	B4	A1	A1
chr1	75650000	75700000	B4	B1	B4	A1	A1
chr1	75700000	75750000	B4	B1	B4	A1	A1
chr1	75750000	75800000	B4	B1	B4	A1	A1
chr1	75800000	75850000	B4	B1	B4	A1	A1
chr1	75850000	75900000	B4	B1	B4	A1	A1
chr1	75900000	75950000	B4	B1	B4	A1	A1
chr1	75950000	76000000	B4	B1	B4	A3	A1
chr1	76000000	76050000	B4	B1	B4	A3	A1
chr1	76050000	76100000	B4	B1	B4	A3	A1
chr1	76100000	76150000	B4	B1	B4	A3	A2
chr1	76150000	76200000	B4	B1	B4	A3	A2
chr1	76200000	76250000	B4	B1	B4	A3	A2
chr1	76250000	76300000	B4	B1	B4	A3	A2
chr1	76300000	76350000	B4	B1	B4	A3	A2
chr1	76350000	76400000	B4	B4	B4	A2	A2
chr1	76400000	76450000	B4	B4	B4	A2	A1
chr1	76450000	76500000	B4	B4	B4	A2	A1
chr1	76500000	76550000	B4	B4	B4	A2	A1
chr1	76550000	76600000	B4	B4	B4	A2	A1
chr1	76600000	76650000	B4	B4	B4	A2	A1
chr1	76650000	76700000	B4	B3	B4	A2	A1
chr1	76700000	76750000	B4	B3	B4	A2	A2
chr1	76750000	76800000	B4	B3	B4	A2	A2
chr1	76800000	76850000	B4	B3	B4	A2	A2
chr1	76850000	76900000	B4	B3	B4	A2	A2
chr1	76900000	76950000	B4	B3	B4	A2	A2
chr1	76950000	77000000	B4	B3	B4	A2	A2
chr1	77000000	77050000	B4	B3	B4	A2	A2
chr1	77050000	77100000	B4	B3	B4	A2	A1
chr1	77100000	77150000	B4	B3	B4	A2	A1
chr1	77150000	77200000	B4	B3	B2	A2	A1
chr1	77200000	77250000	B4	B3	B2	A2	A1
chr1	77250000	77300000	B4	B3	B2	A2	A1
chr1	77300000	77350000	B4	B3	B2	A2	A1
chr1	77350000	77400000	B4	A2	B2	A1	A1
chr1	77400000	77450000	B4	A2	B2	A1	A1
chr1	77450000	77500000	B4	A2	B2	A1	A1
chr1	77500000	77550000	B4	A2	B2	A1	A1
chr1	77550000	77600000	B4	B3	B4	A2	A2
chr1	77600000	77650000	B4	B3	B4	A2	A2
chr1	77650000	77700000	B4	B3	B4	A2	A2
chr1	77700000	77750000	B4	B3	B4	A2	A2
chr1	77750000	77800000	B4	B3	B4	A2	A2
chr1	77800000	77850000	B4	B3	B4	A2	A2
chr1	77850000	77900000	B4	B3	B4	A2	A2
chr1	77900000	77950000	B4	B1	B4	A2	A2
chr1	77950000	78000000	B4	B1	B4	A3	A2
chr1	78000000	78050000	B4	B1	B4	A3	A2
chr1	78050000	78100000	B4	B1	B4	A3	A2
chr1	78100000	78150000	B4	B1	B4	A3	A1
chr1	78150000	78200000	B2	A3	B3	A3	A1
chr1	78200000	78250000	B2	A3	B3	A3	A1
chr1	78250000	78300000	B2	A3	B3	A3	A2
chr1	78300000	78350000	B2	A3	B3	A3	A2
chr1	78350000	78400000	B2	A3	B3	A3	A2
chr1	78400000	78450000	A2	A1	A3	A3	A2
chr1	78450000	78500000	A2	A1	A3	A3	A2
chr1	78500000	78550000	A2	A1	A3	A4	A3
chr1	78550000	78600000	A2	A1	A3	A4	A3
chr1	78600000	78650000	A2	A1	A3	A4	A3
chr1	78650000	78700000	A2	A1	A3	A4	A3
chr1	78700000	78750000	A2	B4	A3	A4	B2
chr1	78750000	78800000	B3	B4	B4	B3	B2
chr1	78800000	78850000	B3	B4	B4	B3	B2
chr1	78850000	78900000	B3	B4	B4	B3	B2
chr1	78900000	78950000	B3	B4	B4	B3	B2
chr1	78950000	79000000	B3	B4	B4	B3	B4
chr1	79000000	79050000	B3	B4	B4	B3	B4
chr1	79050000	79100000	B3	B4	B4	B3	B4
chr1	79100000	79150000	B3	B4	B4	B3	B4
chr1	79150000	79200000	B3	B4	B4	B3	B4
chr1	79200000	79250000	B3	B4	B4	B3	B4
chr1	79250000	79300000	B3	B4	B4	B3	B4
chr1	79300000	79350000	B3	B4	B4	B3	B4
chr1	79350000	79400000	B3	B3	B4	B3	B4
chr1	79400000	79450000	B3	B3	B4	B3	B2
chr1	79450000	79500000	B3	B3	B4	B3	B2
chr1	79500000	79550000	B3	B3	B4	B3	B2
chr1	79550000	79600000	B3	B3	A4	B3	B2
chr1	79600000	79650000	A2	B3	A4	A4	B2
chr1	79650000	79700000	A2	A3	A2	A4	A4
chr1	79700000	79750000	A2	A3	A2	A4	A4
chr1	79750000	79800000	A2	A3	A2	A4	A4
chr1	79800000	79850000	A2	A3	A2	B3	A4
chr1	79850000	79900000	B1	B3	A4	B3	B2
chr1	79900000	79950000	B1	B3	A4	B3	B2
chr1	79950000	80000000	B1	B3	A4	B3	B2
chr1	80000000	80050000	B1	B3	A4	B3	B2
chr1	80050000	80100000	B1	B3	A4	B3	B2
chr1	80100000	80150000	B1	B3	A4	B3	B2
chr1	80150000	80200000	A1	B3	A4	B3	B2
chr1	80200000	80250000	A1	A2	A1	A3	A3
chr1	80250000	80300000	A1	A2	A1	A3	A3
chr1	80300000	80350000	A1	A2	A1	A3	A3
chr1	80350000	80400000	A1	A2	A1	A3	A3
chr1	80400000	80450000	A1	B3	A1	B1	B2
chr1	80450000	80500000	A2	B3	A1	B1	B2
chr1	80500000	80550000	A2	B3	A1	B1	B2
chr1	80550000	80600000	A2	B3	A1	B1	B2
chr1	80600000	80650000	A2	B3	A1	B1	B2
chr1	80650000	80700000	A2	B3	A1	B1	B2
chr1	80700000	80750000	A2	B3	A1	B1	B2
chr1	80750000	80800000	A2	B3	A1	B1	B2
chr1	80800000	80850000	A2	B4	B1	B1	B2
chr1	80850000	80900000	B1	B4	B1	B1	B3
chr1	80900000	80950000	B1	B4	B1	B1	B3
chr1	80950000	81000000	B1	B4	B1	B1	B3
chr1	81000000	81050000	B1	B4	B1	B1	B3
chr1	81050000	81100000	B1	B4	B1	B1	B2
chr1	81100000	81150000	B1	B4	B1	B1	B2
chr1	81150000	81200000	B1	B4	B1	B1	B2
chr1	81200000	81250000	B1	B3	B1	B1	B1
chr1	81250000	81300000	B1	B3	B1	B1	B1
chr1	81300000	81350000	B1	B3	B1	B1	B1
chr1	81350000	81400000	B4	B4	B4	B2	B1
chr1	81400000	81450000	B4	B4	B4	B2	B1
chr1	81450000	81500000	B4	B4	B4	B2	B1
chr1	81500000	81550000	B4	B3	B4	B2	A4
chr1	81550000	81600000	B4	B3	B4	B2	A4
chr1	81600000	81650000	B4	B3	B4	B2	A4
chr1	81650000	81700000	B4	B3	B4	B2	A4
chr1	81700000	81750000	B4	B3	B4	B2	A4
chr1	81750000	81800000	B4	B4	B4	B2	A4
chr1	81800000	81850000	B4	B4	B4	B2	A4
chr1	81850000	81900000	B4	B4	B4	B2	A4
chr1	81900000	81950000	B4	B4	B4	B2	A4
chr1	81950000	82000000	B4	B4	B4	B2	A4
chr1	82000000	82050000	B4	B4	B4	B2	A4
chr1	82050000	82100000	B4	B4	B4	B2	A4
chr1	82100000	82150000	B4	B4	B4	B2	A4
chr1	82150000	82200000	B4	B4	B4	B2	A4
chr1	82200000	82250000	B4	B1	B4	B2	A4
chr1	82250000	82300000	A3	B1	A4	A3	A2
chr1	82300000	82350000	A3	B1	A4	A3	A2
chr1	82350000	82400000	A3	B1	A4	A3	A2
chr1	82400000	82450000	B1	B3	A4	A3	A2
chr1	82450000	82500000	B1	B3	B2	A4	A3
chr1	82500000	82550000	B1	B3	B2	A4	A3
chr1	82550000	82600000	B1	B3	B2	A4	A3
chr1	82600000	82650000	B1	B3	B2	A4	A3
chr1	82650000	82700000	B1	B3	B2	A4	A3
chr1	82700000	82750000	A3	A2	A3	A4	A3
chr1	82750000	82800000	A3	A2	A3	A2	A3
chr1	82800000	82850000	A3	A2	A3	A2	A3
chr1	82850000	82900000	A3	A2	A3	A2	A3
chr1	82900000	82950000	A3	A2	A3	A2	B1
chr1	82950000	83000000	B4	B3	B4	A3	B1
chr1	83000000	83050000	B4	B3	B4	A3	B1
chr1	83050000	83100000	B4	B3	B4	A3	B1
chr1	83100000	83150000	B4	B3	B4	A3	B1
chr1	83150000	83200000	B4	B3	B4	A3	B1
chr1	83200000	83250000	B4	B3	B4	A3	B3
chr1	83250000	83300000	B4	B3	B4	A3	B3
chr1	83300000	83350000	B4	B3	B4	A3	B3
chr1	83350000	83400000	B4	B3	B4	A3	B3
chr1	83400000	83450000	B4	B3	B4	A3	B3
chr1	83450000	83500000	B4	B3	B4	A4	B3
chr1	83500000	83550000	B4	B3	B4	A4	B3
chr1	83550000	83600000	B4	B3	B4	A4	B3
chr1	83600000	83650000	B4	B3	B4	A4	B3
chr1	83650000	83700000	B4	B3	B4	A4	B3
chr1	83700000	83750000	B4	B2	B2	A4	B3
chr1	83750000	83800000	B4	B2	B2	B1	B3
chr1	83800000	83850000	B4	B2	B2	B1	B3
chr1	83850000	83900000	B4	B3	B2	B1	B3
chr1	83900000	83950000	B4	B3	B2	B1	B3
chr1	83950000	84000000	B4	B3	B2	B1	B3
chr1	84000000	84050000	B4	B3	A1	B1	B3
chr1	84050000	84100000	B4	B3	A1	B1	B1
chr1	84100000	84150000	B4	A4	A1	B1	B1
chr1	84150000	84200000	B3	A4	A1	B1	B1
chr1	84200000	84250000	B3	A4	A1	B1	B1
chr1	84250000	84300000	B3	A4	A1	B1	B1
chr1	84300000	84350000	B3	A4	A1	B1	B1
chr1	84350000	84400000	B3	A4	A1	A3	B1
chr1	84400000	84450000	B3	A4	A1	A3	B1
chr1	84450000	84500000	B3	A4	A1	A3	B1
chr1	84500000	84550000	B3	A4	A4	A3	B1
chr1	84550000	84600000	B3	A4	A4	A3	B1
chr1	84600000	84650000	B3	A4	A4	A3	B1
chr1	84650000	84700000	B3	A4	A4	A3	B1
chr1	84700000	84750000	A2	A1	A2	A3	A3
chr1	84750000	84800000	A2	A1	A2	A3	A3
chr1	84800000	84850000	A2	A1	A2	A3	A3
chr1	84850000	84900000	A2	A1	A2	B2	A3
chr1	84900000	84950000	B4	A1	A2	B2	A3
chr1	84950000	85000000	B4	B2	B3	NA	NA
chr1	85000000	85050000	B4	B2	B3	NA	NA
chr1	85050000	85100000	B4	B2	B3	NA	NA
chr1	85100000	85150000	B4	B2	B3	NA	B3
chr1	85150000	85200000	B4	B2	B3	NA	NA
chr1	85200000	85250000	B4	B2	B3	NA	B3
chr1	85250000	85300000	B4	B2	B3	NA	NA
chr1	87350000	87400000	B4	B2	A3	NA	NA
chr1	87400000	87450000	A1	B2	A3	NA	NA
chr1	87450000	87500000	A1	B2	A3	NA	B3
chr1	87500000	87550000	A1	B2	A3	B2	B3
chr1	87550000	87600000	A1	B2	A1	B2	B3
chr1	87600000	87650000	A1	B2	A1	B2	B3
chr1	87650000	87700000	A1	A1	A1	B2	B3
chr1	87700000	87750000	A1	A1	A1	A3	A2
chr1	87750000	87800000	A1	A1	A1	A3	A2
chr1	87800000	87850000	A1	A1	A1	A3	A2
chr1	87850000	87900000	A1	A1	A1	A3	A2
chr1	87900000	87950000	A1	A1	A1	A3	A2
chr1	87950000	88000000	A1	A1	A1	A1	A1	Common_A1
chr1	88000000	88050000	A1	A1	A1	A1	A1	Common_A1
chr1	88050000	88100000	A1	A1	A1	A1	A1	Common_A1
chr1	88100000	88150000	A1	A1	A1	A1	A1	Common_A1
chr1	88150000	88200000	A1	A1	A1	A1	A1	Common_A1
chr1	88200000	88250000	A1	A1	A1	A1	A1	Common_A1
chr1	88250000	88300000	A1	A1	A1	A1	A1	Common_A1
chr1	88300000	88350000	A1	A1	A1	A1	A1	Common_A1
chr1	88350000	88400000	A1	A1	A1	A1	A1	Common_A1
chr1	88400000	88450000	A1	A1	A1	A1	A1	Common_A1
chr1	88450000	88500000	A1	A1	A1	A1	A1	Common_A1
chr1	88500000	88550000	A3	A2	A3	A1	A2
chr1	88550000	88600000	A3	A2	A3	A2	A2
chr1	88600000	88650000	A3	A2	A3	A2	A2
chr1	88650000	88700000	A3	A2	A3	A2	A2
chr1	88700000	88750000	A3	A2	A3	A2	A2
chr1	88750000	88800000	A3	A2	A3	A2	A2
chr1	88800000	88850000	A3	A2	A3	A2	A2
chr1	88850000	88900000	A3	A2	A3	A2	A2
chr1	88900000	88950000	A3	A2	A3	A2	A2
chr1	88950000	89000000	A3	A2	A3	A2	A2
chr1	89000000	89050000	A3	A2	A3	A1	A2
chr1	89050000	89100000	A2	A1	A1	A1	A1
chr1	89100000	89150000	A2	A1	A1	A1	A1
chr1	89150000	89200000	A2	A1	A1	A1	A1
chr1	89200000	89250000	A2	A1	A1	A1	A1
chr1	89250000	89300000	A2	A1	A1	A1	A1
chr1	89300000	89350000	A2	A1	A1	A1	A1
chr1	89350000	89400000	A2	A1	A1	A1	A3
chr1	89400000	89450000	A2	A1	A1	A2	A3
chr1	89450000	89500000	A2	A1	A1	A2	A3
chr1	89500000	89550000	A1	A1	A1	A2	A3
chr1	89550000	89600000	A1	A1	NA	A2	A3
chr1	89600000	89650000	A1	A1	A1	A2	A3
chr1	89650000	89700000	A1	A1	NA	A2	A3
chr1	89700000	89750000	A1	A1	A1	A2	A3
chr1	89750000	89800000	A1	A1	A1	A2	A3
chr1	89800000	89850000	A1	A1	A1	A2	A3
chr1	89850000	89900000	A1	A1	A1	A2	A3
chr1	89900000	89950000	A1	A4	A1	A4	A3
chr1	89950000	90000000	A1	A4	A1	A4	A3
chr1	90000000	90050000	A1	A4	A1	A4	A3
chr1	90050000	90100000	A3	A4	A1	A4	A3
chr1	90100000	90150000	A3	A4	A4	B2	B3
chr1	90150000	90200000	A3	A4	A4	B2	B3
chr1	90200000	90250000	A3	A2	A4	B2	B3
chr1	90250000	90300000	A1	A2	A2	A1	A2
chr1	90300000	90350000	A1	A2	A2	A1	A2
chr1	90350000	90400000	A1	A2	A2	A1	A2
chr1	90400000	90450000	A1	A2	A2	A1	A2
chr1	90450000	90500000	A1	A2	A2	A1	A1
chr1	90500000	90550000	A1	A2	A2	A1	A1
chr1	90550000	90600000	A1	A2	A2	A1	A1
chr1	90600000	90650000	A1	A2	A2	A1	A1
chr1	90650000	90700000	A1	A3	B2	A1	A1
chr1	90700000	90750000	A4	A3	B2	A1	A1
chr1	90750000	90800000	A4	A3	B2	A1	A1
chr1	90800000	90850000	A4	A3	B2	A1	A1
chr1	90850000	90900000	A4	A2	B2	A1	A1
chr1	90900000	90950000	A3	A2	A3	A1	A1
chr1	90950000	91000000	A3	A2	A3	A1	A1
chr1	91000000	91050000	A3	A2	A3	A1	A1
chr1	91050000	91100000	A3	A2	A3	A1	A1
chr1	91100000	91150000	A3	A4	A3	A1	A2
chr1	91150000	91200000	B1	A4	A3	A1	A2
chr1	91200000	91250000	B1	A4	A3	A1	A2
chr1	91250000	91300000	B1	A4	A3	A1	A2
chr1	91300000	91350000	B1	A2	A3	A1	A1
chr1	91350000	91400000	B1	A2	A1	A1	A1
chr1	91400000	91450000	A4	A2	A1	A1	A1
chr1	91450000	91500000	A4	A2	A1	A1	A1
chr1	91500000	91550000	A4	A2	A1	A1	A1
chr1	91550000	91600000	A4	A2	A2	A1	A1
chr1	91600000	91650000	A4	A2	A2	A1	A1
chr1	91650000	91700000	B1	A2	A2	A1	A1
chr1	91700000	91750000	B1	A1	A2	A1	A1
chr1	91750000	91800000	B1	A1	A2	A1	A1
chr1	91800000	91850000	B1	A1	A2	A1	A1
chr1	91850000	91900000	B1	A1	B2	A1	A2
chr1	91900000	91950000	B2	A3	B2	A1	A2
chr1	91950000	92000000	B2	A3	B2	A1	A2
chr1	92000000	92050000	B2	A3	B2	A1	A2
chr1	92050000	92100000	B2	A3	B2	A1	A2
chr1	92100000	92150000	B2	A3	B2	A1	A2
chr1	92150000	92200000	B2	A3	B2	A1	A2
chr1	92200000	92250000	B2	A4	B3	A1	A3
chr1	92250000	92300000	B2	A4	B3	A1	A3
chr1	92300000	92350000	B2	A4	B3	A1	A3
chr1	92350000	92400000	B2	A3	B3	A1	A3
chr1	92400000	92450000	B2	A3	B3	A1	A3
chr1	92450000	92500000	A4	A3	A4	A1	A3
chr1	92500000	92550000	A4	A3	A4	A2	A3
chr1	92550000	92600000	A4	A4	B2	A2	A3
chr1	92600000	92650000	A4	A4	B2	A2	A3
chr1	92650000	92700000	A4	A4	B2	A2	A3
chr1	92700000	92750000	A4	A4	B2	A2	A3
chr1	92750000	92800000	A4	A4	B2	A2	A3
chr1	92800000	92850000	A1	A2	B2	A2	A3
chr1	92850000	92900000	A1	A2	A1	A1	A2
chr1	92900000	92950000	A1	A2	A1	A1	A2
chr1	92950000	93000000	A1	A2	A1	A1	A2
chr1	93000000	93050000	A1	A2	A1	A1	A2
chr1	93050000	93100000	A1	A2	A1	A1	A2
chr1	93100000	93150000	A1	A2	A1	A1	A2
chr1	93150000	93200000	A1	A1	A1	A1	A2
chr1	93200000	93250000	A1	A1	A1	A1	A2
chr1	93250000	93300000	A1	A1	A1	A1	A1	Common_A1
chr1	93300000	93350000	A1	A1	A1	A1	A1	Common_A1
chr1	93350000	93400000	A1	A1	A1	A1	A1	Common_A1
chr1	93400000	93450000	A1	A1	A1	A1	A1	Common_A1
chr1	93450000	93500000	A1	A1	B1	A1	A3
chr1	93500000	93550000	A1	A3	B1	A1	A3
chr1	93550000	93600000	A1	A3	B1	A1	A3
chr1	93600000	93650000	A1	A3	B1	A1	A3
chr1	93650000	93700000	A3	A3	B1	A1	A3
chr1	93700000	93750000	A3	A3	B1	A1	A3
chr1	93750000	93800000	A3	A1	B1	A1	A3
chr1	93800000	93850000	A3	A1	A1	A1	A3
chr1	93850000	93900000	A1	A1	A1	A1	A1	Common_A1
chr1	93900000	93950000	A1	A1	A1	A1	A1	Common_A1
chr1	93950000	94000000	A1	A1	A1	A1	A1	Common_A1
chr1	94000000	94050000	A1	A1	A1	A1	A1	Common_A1
chr1	94050000	94100000	A1	A1	A1	A1	A1	Common_A1
chr1	94100000	94150000	A3	A2	A1	A1	A1
chr1	94150000	94200000	A3	A2	A2	A1	A2
chr1	94200000	94250000	A3	A2	A2	A1	A2
chr1	94250000	94300000	A3	A2	A2	A1	A2
chr1	94300000	94350000	A3	A2	A2	A1	A2
chr1	94350000	94400000	A3	A2	A2	A1	A2
chr1	94400000	94450000	A3	A3	A4	A1	A2
chr1	94450000	94500000	A3	A3	A4	A1	A2
chr1	94500000	94550000	A3	A3	A1	A1	A2
chr1	94550000	94600000	A3	A3	A1	A1	A1
chr1	94600000	94650000	A3	A3	A1	A1	A1
chr1	94650000	94700000	A3	A3	A1	A1	A1
chr1	94700000	94750000	A2	A3	A1	A1	A1
chr1	94750000	94800000	A2	A1	A1	A1	A1
chr1	94800000	94850000	A2	A1	A1	A1	A1
chr1	94850000	94900000	A2	A1	A1	A1	A1
chr1	94900000	94950000	A4	A1	A1	A1	A1
chr1	94950000	95000000	A4	A1	A2	A1	A1
chr1	95000000	95050000	A4	A1	A2	A1	A1
chr1	95050000	95100000	A4	A1	A2	A1	A1
chr1	95100000	95150000	A4	A1	A2	A1	A1
chr1	95150000	95200000	A2	A1	A2	A1	A1
chr1	95200000	95250000	A2	A1	A1	A1	A1
chr1	95250000	95300000	A2	A1	A1	A1	A1
chr1	95300000	95350000	A2	A1	A1	A1	A1
chr1	95350000	95400000	A2	A1	A1	A1	A1
chr1	95400000	95450000	A2	A1	A1	A1	A1
chr1	95450000	95500000	A2	A1	A1	A1	A1
chr1	95500000	95550000	A2	A1	A1	A1	A1
chr1	95550000	95600000	A2	A1	A1	A1	A1
chr1	95600000	95650000	A2	A1	A1	A1	A1
chr1	95650000	95700000	A2	A1	A1	A1	A1
chr1	95700000	95750000	A2	A1	A1	A1	A1
chr1	95800000	95850000	A2	A1	NA	B1	NA
chr1	95900000	95950000	A2	B1	A3	B1	B1
chr1	95950000	96000000	A2	B1	A3	B1	B1
chr1	96000000	96050000	A2	B1	B3	B3	B1
chr1	96050000	96100000	B2	B1	B3	B3	B1
chr1	96100000	96150000	B2	B1	B3	B3	B1
chr1	96150000	96200000	B2	B1	B3	B3	B1
chr1	96200000	96250000	B2	B1	B3	B3	B1
chr1	96250000	96300000	B2	B1	B3	B3	B1
chr1	96300000	96350000	B2	B3	B3	B3	B1
chr1	96350000	96400000	B2	B3	B1	B3	B1
chr1	96400000	96450000	B2	B4	B1	B3	B1
chr1	96450000	96500000	B2	B4	B1	B3	B1
chr1	96500000	96550000	B2	B4	B1	B4	B2
chr1	96550000	96600000	B2	B4	B1	B4	B2
chr1	96600000	96650000	B1	B3	B1	B4	B2
chr1	96650000	96700000	B1	B3	B1	B4	B2
chr1	96700000	96750000	B1	B3	B1	B4	B2
chr1	96750000	96800000	B1	B3	B1	B4	B2
chr1	96800000	96850000	B1	B3	B1	B4	B2
chr1	96850000	96900000	B1	B3	B1	B4	B2
chr1	96900000	96950000	B1	B3	B1	B4	B2
chr1	96950000	97000000	B1	B3	B1	B4	B2
chr1	97000000	97050000	A2	B3	B1	B4	B2
chr1	97050000	97100000	A2	B3	B1	B4	B2
chr1	97100000	97150000	A2	B3	B1	B1	B1
chr1	97150000	97200000	A2	B3	A2	B1	B1
chr1	97200000	97250000	A2	B3	A2	B1	B1
chr1	97250000	97300000	A3	B3	A2	B3	B1
chr1	97300000	97350000	A3	B3	A2	B3	B2
chr1	97350000	97400000	A3	B3	A2	B3	B2
chr1	97400000	97450000	A3	B3	A2	B3	B2
chr1	97450000	97500000	A2	B3	A1	B2	B1
chr1	97500000	97550000	A2	B3	A1	B2	B1
chr1	97550000	97600000	A2	B3	A1	B2	B1
chr1	97600000	97650000	A2	B3	B4	B2	B1
chr1	97650000	97700000	A2	B3	B4	B4	B3
chr1	97700000	97750000	B3	B4	B4	B4	B3
chr1	97750000	97800000	B3	B4	B4	B4	B3
chr1	97800000	97850000	B3	B4	B4	B4	B3
chr1	97850000	97900000	B3	B4	B4	B4	B3
chr1	97900000	97950000	B3	B4	B4	B4	B3
chr1	97950000	98000000	B3	B4	B4	B4	B3
chr1	98000000	98050000	B3	B4	B4	B4	B3
chr1	98050000	98100000	B3	B4	B4	B4	B3
chr1	98100000	98150000	B3	B4	B4	B4	B3
chr1	98150000	98200000	B3	B4	B4	B4	B2
chr1	98200000	98250000	B4	B4	B4	B4	B2
chr1	98250000	98300000	B4	B4	B4	B4	B2
chr1	98300000	98350000	B4	B4	B4	B4	B3
chr1	98350000	98400000	B4	B4	B4	B4	B3
chr1	98400000	98450000	B4	B4	B4	B4	B3
chr1	98450000	98500000	B4	B4	B4	B4	B3
chr1	98500000	98550000	B4	B4	B4	B4	B3
chr1	98550000	98600000	B4	B4	B4	B4	B3
chr1	98600000	98650000	B4	B4	B4	B4	B3
chr1	98650000	98700000	B3	B3	B3	B3	B3
chr1	98700000	98750000	B3	B3	B3	B3	B3
chr1	98750000	98800000	B3	B3	B3	B3	B3
chr1	98800000	98850000	B3	B3	B3	B4	B3
chr1	98850000	98900000	B3	B3	B3	B4	B3
chr1	98900000	98950000	B2	B3	B3	B4	B3
chr1	98950000	99000000	B2	B3	B3	B4	B3
chr1	99000000	99050000	B2	B4	B3	B4	B3
chr1	99050000	99100000	B2	B4	B3	B4	B3
chr1	99100000	99150000	B2	B4	B3	B4	B3
chr1	99150000	99200000	B2	B4	B3	B4	B3
chr1	99200000	99250000	B2	B4	B3	B4	B3
chr1	99250000	99300000	A2	B4	B3	B4	B3
chr1	99300000	99350000	A2	B4	B3	B4	B3
chr1	99350000	99400000	A2	B4	B3	B4	B3
chr1	99400000	99450000	A2	B4	B3	B4	B3
chr1	99450000	99500000	A2	B4	B3	B4	B3
chr1	99500000	99550000	A2	A3	A2	B4	A3
chr1	99550000	99600000	A2	A3	A2	A3	A3
chr1	99600000	99650000	A2	A3	A2	A3	A3
chr1	99650000	99700000	A2	A3	A2	A3	A3
chr1	99700000	99750000	A2	B1	A4	A3	A3
chr1	99750000	99800000	A4	B1	A4	A3	A3
chr1	99800000	99850000	A4	B1	A4	A3	A3
chr1	99850000	99900000	A4	B1	A2	A3	A3
chr1	99900000	99950000	A4	B1	A2	A3	A3
chr1	99950000	100000000	A4	B1	A2	A3	A3
chr1	100000000	100050000	A4	B1	A2	B1	B2
chr1	100050000	100100000	B3	B1	B3	B1	B2
chr1	100100000	100150000	B3	B4	B3	B1	B2
chr1	100150000	100200000	B3	B4	B3	B1	B2
chr1	100200000	100250000	B3	B4	B3	B1	B2
chr1	100250000	100300000	B3	B4	B3	B1	B4
chr1	100300000	100350000	B3	B4	B3	B4	B4
chr1	100350000	100400000	B3	B4	B3	B4	B4
chr1	100400000	100450000	B3	B4	B2	B4	B4
chr1	100450000	100500000	B3	B4	B2	B4	B4
chr1	100500000	100550000	B4	B2	B2	B4	B4
chr1	100550000	100600000	B4	B2	B2	B4	B4
chr1	100600000	100650000	B4	B4	B2	B4	B4
chr1	100650000	100700000	B4	B4	B2	B4	B4
chr1	100700000	100750000	B4	B4	B4	B4	B4	Common_B4
chr1	100750000	100800000	B4	B4	B4	B4	B4	Common_B4
chr1	100800000	100850000	B4	B4	B4	B4	B4	Common_B4
chr1	100850000	100900000	B4	B4	B4	B4	B4	Common_B4
chr1	100900000	100950000	B4	B4	B4	B4	B4	Common_B4
chr1	100950000	101000000	B4	B4	B4	B4	B4	Common_B4
chr1	101000000	101050000	B4	B4	B4	B4	B4	Common_B4
chr1	101050000	101100000	B4	B4	B4	B4	B4	Common_B4
chr1	101100000	101150000	B4	B4	B4	B4	B4	Common_B4
chr1	101150000	101200000	B4	B4	B4	B4	B4	Common_B4
chr1	101200000	101250000	B4	B4	B4	B4	B4	Common_B4
chr1	101250000	101300000	B4	B4	B4	B4	B4	Common_B4
chr1	101300000	101350000	B4	B4	B4	B4	B4	Common_B4
chr1	101350000	101400000	B4	B4	B4	B4	B4	Common_B4
chr1	101400000	101450000	B4	B4	B4	B4	B4	Common_B4
chr1	101450000	101500000	B4	B4	B4	B4	B4	Common_B4
chr1	101500000	101550000	B4	B4	B4	B4	B4	Common_B4
chr1	101550000	101600000	B4	B4	B4	B4	B4	Common_B4
chr1	101600000	101650000	B4	B4	B4	B4	B4	Common_B4
chr1	101650000	101700000	B4	B4	B4	B4	B4	Common_B4
chr1	101700000	101750000	B4	B4	B4	B4	B4	Common_B4
chr1	101750000	101800000	B4	B4	B4	B4	B4	Common_B4
chr1	101800000	101850000	B4	B4	B4	B4	B4	Common_B4
chr1	101850000	101900000	B4	B4	B4	B4	B4	Common_B4
chr1	101900000	101950000	B4	B4	B3	B4	B4
chr1	101950000	102000000	B4	B4	B3	B4	B4
chr1	102000000	102050000	B4	B4	B3	B4	B4
chr1	102050000	102100000	B4	B4	B3	B4	B4
chr1	102100000	102150000	B4	B4	B4	B4	B4	Common_B4
chr1	102150000	102200000	B4	B4	B4	B4	B4	Common_B4
chr1	102200000	102250000	B4	B4	B4	B4	B4	Common_B4
chr1	102250000	102300000	B4	B4	B4	B4	B4	Common_B4
chr1	102300000	102350000	B4	B4	B4	B4	B4	Common_B4
chr1	102350000	102400000	B4	B4	B4	B4	B4	Common_B4
chr1	102400000	102450000	B4	B3	B4	B4	B4
chr1	102450000	102500000	B4	B3	B4	B4	B4
chr1	102500000	102550000	B4	B3	B4	B4	B4
chr1	102550000	102600000	B4	B3	B4	B4	B4
chr1	102600000	102650000	B4	B3	B4	B4	B4
chr1	102650000	102700000	B4	B3	B4	B4	B4
chr1	102700000	102750000	B4	B3	B4	B4	B4
chr1	102750000	102800000	B4	B3	B4	B4	B4
chr1	102800000	102850000	B4	B3	B4	B4	B4
chr1	102850000	102900000	B4	B4	B4	B4	B4	Common_B4
chr1	102900000	102950000	B4	B4	B4	B4	B4	Common_B4
chr1	102950000	103000000	B4	B4	B4	B4	B4	Common_B4
chr1	103000000	103050000	B4	B4	B4	B4	B4	Common_B4
chr1	103050000	103100000	B4	B4	B4	B4	B4	Common_B4
chr1	103100000	103150000	B4	B4	B4	B4	B4	Common_B4
chr1	103150000	103200000	B4	B4	B4	B4	B4	Common_B4
chr1	103200000	103250000	B4	B4	B4	B4	B4	Common_B4
chr1	103250000	103300000	B4	B4	B4	B4	B4	Common_B4
chr1	103300000	103350000	B4	B4	B4	B4	B4	Common_B4
chr1	103350000	103400000	B4	B4	B4	B4	B4	Common_B4
chr1	103400000	103450000	B4	B4	B4	B4	B4	Common_B4
chr1	103450000	103500000	B4	B4	B4	B4	B4	Common_B4
chr1	103500000	103550000	B4	A4	B4	B4	B4
chr1	103550000	103600000	B4	A4	B4	B4	B4
chr1	103600000	103650000	B4	A4	B4	B4	B4
chr1	103650000	103700000	B4	A4	B4	B4	B4
chr1	103700000	103750000	B4	A4	B3	B4	B4
chr1	103750000	103800000	B4	A4	B3	B4	B4
chr1	103800000	103850000	B4	A4	B3	B4	B4
chr1	103850000	103900000	B4	B3	B3	B4	B4
chr1	103900000	103950000	B4	B3	B4	B4	B4
chr1	103950000	104000000	B4	B3	B4	B4	B4
chr1	104000000	104050000	B4	B3	B4	B4	B4
chr1	104050000	104100000	B4	B3	B4	B4	B4
chr1	104100000	104150000	B4	B3	B4	B4	B4
chr1	104150000	104200000	B4	B3	B4	B4	B4
chr1	104200000	104250000	B4	B3	B4	B4	B4
chr1	104250000	104300000	B4	B3	B4	B4	B4
chr1	104300000	104350000	B4	B4	B4	B4	B4	Common_B4
chr1	104350000	104400000	B4	B4	B4	B4	B4	Common_B4
chr1	104400000	104450000	B4	B4	B4	B4	B4	Common_B4
chr1	104450000	104500000	B4	B4	B4	B4	B4	Common_B4
chr1	104500000	104550000	B4	B4	B4	B4	B4	Common_B4
chr1	104550000	104600000	B4	B4	B4	B4	B4	Common_B4
chr1	104600000	104650000	B4	B4	B4	B4	B4	Common_B4
chr1	104650000	104700000	B4	B4	B4	B4	B4	Common_B4
chr1	104700000	104750000	B4	B4	B4	B4	B4	Common_B4
chr1	104750000	104800000	B4	B4	B4	B4	B4	Common_B4
chr1	104800000	104850000	B4	B4	B4	B4	B4	Common_B4
chr1	104850000	104900000	B4	B4	B4	B4	B4	Common_B4
chr1	104900000	104950000	B4	B4	B4	B4	B4	Common_B4
chr1	104950000	105000000	B4	B4	B4	B4	B4	Common_B4
chr1	105000000	105050000	B4	B4	B4	B4	B4	Common_B4
chr1	105050000	105100000	B4	B4	B4	B4	B4	Common_B4
chr1	105100000	105150000	B4	B4	B4	B4	B4	Common_B4
chr1	105150000	105200000	B4	B4	B4	B4	B4	Common_B4
chr1	105200000	105250000	B4	B4	B4	B4	B4	Common_B4
chr1	105250000	105300000	B4	B4	B4	B4	B4	Common_B4
chr1	105300000	105350000	B4	B4	B4	B4	B4	Common_B4
chr1	105350000	105400000	B4	B4	B4	B4	B4	Common_B4
chr1	105400000	105450000	B4	B4	B4	B4	B4	Common_B4
chr1	105450000	105500000	B4	B4	B4	B4	B4	Common_B4
chr1	105500000	105550000	B4	B4	B4	B4	B4	Common_B4
chr1	105550000	105600000	B4	B4	B4	B4	B4	Common_B4
chr1	105600000	105650000	B4	B4	B4	B3	B4
chr1	105650000	105700000	B4	B4	B4	B3	B3
chr1	105700000	105750000	B4	B4	B4	B3	B3
chr1	105750000	105800000	B4	B4	B4	B4	B4	Common_B4
[truncated: 63,536 more rows]
