# Supplementary material for: Identification of Two Subsets of Subcompartment A1 Associated with High Transcriptional Activity and Frequent Loop Extrusion
Source: Biology (Basel). 2023 Jul 27;12(8):1058. doi: 10.3390/biology12081058 (PMC10451812; doi:10.3390/biology12081058)
Supplement: Supplementary file 1 [file biology-12-01058-s001.zip › Table S3. List of subcompartments in human cells.xls]

## Sheet: Subcomparment lists (hg19)
chrom	start	end	Gm12878	Hap1	HEK293T	Hela	K562	Note: common A1 or common B4 was marked
chr1	520000	560000	B1	NA	NA	NA	A4
chr1	560000	600000	B1	NA	NA	A3	A4
chr1	600000	640000	B1	NA	NA	NA	A2
chr1	640000	680000	B1	NA	A3	A3	A2
chr1	680000	720000	A2	A2	NA	A3	A2
chr1	720000	760000	A2	A2	A3	A3	A2
chr1	760000	800000	A2	A2	A3	A3	A2
chr1	800000	840000	A2	A2	A3	A3	A2
chr1	840000	880000	A2	A2	A3	A3	A2
chr1	880000	920000	A1	A2	NA	A3	A2
chr1	920000	960000	A1	A2	A3	A3	A2
chr1	960000	1000000	A1	A2	NA	A3	A2
chr1	1000000	1040000	A1	A3	NA	A3	A2
chr1	1040000	1080000	A1	A3	A3	A3	A2
chr1	1080000	1120000	A1	A3	A3	A3	A2
chr1	1120000	1160000	A1	A3	A3	A3	A2
chr1	1160000	1200000	A1	A2	NA	A3	A2
chr1	1200000	1240000	A1	A2	A3	A3	A2
chr1	1240000	1280000	A1	A2	NA	A3	A2
chr1	1280000	1320000	A1	A2	A3	A2	A2
chr1	1320000	1360000	A1	A2	NA	A2	A2
chr1	1360000	1400000	A1	A2	A3	A2	A2
chr1	1400000	1440000	A1	A2	A3	A2	A2
chr1	1440000	1480000	A1	A2	A3	A2	A2
chr1	1480000	1520000	A1	A2	A3	A2	A2
chr1	1520000	1560000	A1	A2	A3	A2	A2
chr1	1560000	1600000	A1	A2	A3	A2	A2
chr1	1600000	1640000	A1	A2	A3	A2	A2
chr1	1640000	1680000	A1	A2	A3	A2	A2
chr1	1680000	1720000	A1	A2	A3	A2	A2
chr1	1720000	1760000	A1	A2	A3	A2	A2
chr1	1760000	1800000	A1	A2	A3	A2	A2
chr1	1800000	1840000	A1	A2	A3	A2	A2
chr1	1840000	1880000	B1	A2	A3	A2	A1
chr1	1880000	1920000	B1	A2	A3	A2	A1
chr1	1920000	1960000	B1	A2	A3	A2	A1
chr1	1960000	2000000	B1	A2	A3	A2	A1
chr1	2000000	2040000	B1	A2	A3	A2	A1
chr1	2040000	2080000	B1	A2	A3	A2	A1
chr1	2080000	2120000	B1	A2	A3	A2	A1
chr1	2120000	2160000	A2	A2	A2	A2	A1
chr1	2160000	2200000	A2	A2	A2	A2	A1
chr1	2200000	2240000	A2	A3	A2	A2	A1
chr1	2240000	2280000	A3	A3	A2	A2	A1
chr1	2280000	2320000	A3	A3	A2	A2	A2
chr1	2320000	2360000	A3	A3	A2	A3	A2
chr1	2360000	2400000	A3	A3	NA	A3	A2
chr1	2400000	2440000	A3	A3	A4	A3	A2
chr1	2440000	2480000	A3	A3	A4	A3	A2
chr1	2480000	2520000	A3	A3	A4	A3	A2
chr1	2520000	2560000	A3	A3	A4	A4	A2
chr1	2560000	2600000	B3	A3	A4	A4	B1
chr1	2600000	2640000	B3	B1	NA	A4	B1
chr1	2680000	2720000	B3	B1	A4	A4	B1
chr1	2720000	2760000	B3	B1	A4	A4	B1
chr1	2760000	2800000	B3	B1	NA	A4	B1
chr1	2800000	2840000	B3	B1	A4	A4	B1
chr1	2840000	2880000	B3	B1	A4	A4	B1
chr1	2880000	2920000	B4	B1	A4	A4	B1
chr1	2920000	2960000	B4	B1	A4	A4	B1
chr1	2960000	3000000	B4	A4	A4	A4	B1
chr1	3000000	3040000	B4	A4	A4	A4	B1
chr1	3040000	3080000	B4	A4	A3	A4	A4
chr1	3080000	3120000	B4	A4	A3	A4	A4
chr1	3120000	3160000	B4	A4	A3	A4	A4
chr1	3160000	3200000	B4	A4	A4	A4	A4
chr1	3200000	3240000	B4	A4	A4	A4	A4
chr1	3240000	3280000	B4	A4	A4	A4	A4
chr1	3280000	3320000	B4	A4	A4	A4	A4
chr1	3320000	3360000	B4	A4	A4	A4	A4
chr1	3360000	3400000	B2	A2	A4	A2	A1
chr1	3400000	3440000	B2	A2	A4	A2	A1
chr1	3440000	3480000	B2	A2	A4	A2	A1
chr1	3480000	3520000	B2	A2	A4	A2	A1
chr1	3520000	3560000	A2	A2	A4	A2	A1
chr1	3560000	3600000	A2	A2	A4	A2	A1
chr1	3600000	3640000	A2	A2	A4	A2	A1
chr1	3640000	3680000	A2	A2	B1	A2	A1
chr1	3680000	3720000	A2	A2	B1	A2	A1
chr1	3720000	3760000	A2	A2	B1	A2	A1
chr1	3760000	3800000	A2	A2	B1	A2	A1
chr1	3800000	3840000	A2	B4	B1	B2	A4
chr1	3840000	3880000	B1	NA	NA	B2	A4
chr1	3960000	4000000	B1	NA	B1	B2	A4
chr1	4000000	4040000	B4	B4	B1	B2	B2
chr1	4040000	4080000	B4	B4	B1	B2	B2
chr1	4080000	4120000	B4	B4	B1	B2	B2
chr1	4120000	4160000	B4	B4	B1	B2	B2
chr1	4160000	4200000	B4	B4	B3	B4	B2
chr1	4200000	4240000	B4	B4	B3	B4	B2
chr1	4240000	4280000	B4	B4	B3	B4	B2
chr1	4280000	4320000	B4	B4	B3	B4	B2
chr1	4320000	4360000	B4	B4	B3	B4	B2
chr1	4360000	4400000	B4	B4	B3	B4	B2
chr1	4400000	4440000	B4	B4	B3	B4	B2
chr1	4440000	4480000	B4	B4	B3	B4	B2
chr1	4480000	4520000	B4	B4	B3	B4	B2
chr1	4520000	4560000	B4	B4	B3	B4	B2
chr1	4560000	4600000	B4	B4	B3	B4	B2
chr1	4600000	4640000	B4	B4	B3	B4	B2
chr1	4640000	4680000	B4	B4	B3	B4	B2
chr1	4680000	4720000	B4	B4	B3	B4	B2
chr1	4720000	4760000	B4	B3	B3	B4	B2
chr1	4760000	4800000	B4	B3	B3	B4	B2
chr1	4800000	4840000	B4	B3	B3	B4	B2
chr1	4840000	4880000	B4	B4	B4	B4	B2
chr1	4880000	4920000	B4	B4	B4	B4	B4	Common_B4
chr1	4920000	4960000	B4	B4	B4	B4	B4	Common_B4
chr1	4960000	5000000	B4	B4	B4	B4	B4	Common_B4
chr1	5000000	5040000	B4	B4	B4	B4	B4	Common_B4
chr1	5040000	5080000	B4	B4	B4	B4	B4	Common_B4
chr1	5080000	5120000	B4	B4	B4	B4	B4	Common_B4
chr1	5120000	5160000	B4	B4	B4	B4	B4	Common_B4
chr1	5160000	5200000	B4	B4	B4	B4	B4	Common_B4
chr1	5200000	5240000	B4	B4	B4	B4	B4	Common_B4
chr1	5240000	5280000	B4	B4	B4	B4	B4	Common_B4
chr1	5280000	5320000	B4	B4	B4	B4	B4	Common_B4
chr1	5320000	5360000	B4	B4	B4	B4	B4	Common_B4
chr1	5360000	5400000	B4	B4	B4	B4	B4	Common_B4
chr1	5400000	5440000	B4	B4	B4	B4	B4	Common_B4
chr1	5440000	5480000	B4	B4	B4	B4	B4	Common_B4
chr1	5480000	5520000	B4	B3	B4	B2	B4
chr1	5520000	5560000	B4	B3	B3	B2	B1
chr1	5560000	5600000	B4	B3	B3	B2	B1
chr1	5600000	5640000	B4	B3	B3	B2	B1
chr1	5640000	5680000	B4	B3	B3	B2	B1
chr1	5680000	5720000	B4	B3	B3	B2	B1
chr1	5720000	5760000	B4	B3	B3	B2	B1
chr1	5760000	5800000	B4	B3	B3	B2	B1
chr1	5800000	5840000	B4	B3	B3	B2	B1
chr1	5840000	5880000	B4	B3	B3	B2	B1
chr1	5880000	5920000	B4	B1	B3	B2	B1
chr1	5920000	5960000	B4	B1	B3	B2	B1
chr1	5960000	6000000	B4	B1	B3	B2	B1
chr1	6000000	6040000	A4	B1	B3	B2	A2
chr1	6040000	6080000	A4	A3	A3	A2	A2
chr1	6080000	6120000	A4	A3	A3	A2	A2
chr1	6120000	6160000	A4	A3	A3	A2	A2
chr1	6160000	6200000	A4	A3	A3	A2	A2
chr1	6200000	6240000	A4	A3	A3	A2	A2
chr1	6240000	6280000	A2	A1	A3	A2	A1
chr1	6280000	6320000	A2	A1	A2	A2	A1
chr1	6320000	6360000	A2	A1	A2	A2	A1
chr1	6360000	6400000	A2	A1	A2	A2	A1
chr1	6400000	6440000	A2	A1	A2	A1	A1
chr1	6440000	6480000	A2	A1	A2	A1	A1
chr1	6480000	6520000	A2	A1	A2	A1	A1
chr1	6520000	6560000	A2	A1	A1	A1	A1
chr1	6560000	6600000	A2	A1	A1	A1	A1
chr1	6600000	6640000	A1	A1	A1	A1	A1	Common_A1
chr1	6640000	6680000	A1	A1	A1	A1	A1	Common_A1
chr1	6680000	6720000	A1	A1	A1	A1	A1	Common_A1
chr1	6720000	6760000	A2	A2	A1	A1	A2
chr1	6760000	6800000	A2	A2	A1	A1	A2
chr1	6800000	6840000	A2	A2	A1	A1	A2
chr1	6840000	6880000	A2	A2	A1	A1	A2
chr1	6880000	6920000	A2	A2	A1	A1	A2
chr1	6920000	6960000	A2	A2	A1	A1	A2
chr1	6960000	7000000	B3	A2	A1	A1	A2
chr1	7000000	7040000	B3	A2	A1	A2	A2
chr1	7040000	7080000	B3	B1	A1	A2	A2
chr1	7080000	7120000	B3	B1	A4	A2	A4
chr1	7120000	7160000	B3	B1	A4	A2	A4
chr1	7160000	7200000	B3	B1	A4	A2	A4
chr1	7200000	7240000	B3	B1	A4	A2	A4
chr1	7240000	7280000	B3	B1	A4	A2	A4
chr1	7280000	7320000	B3	B1	A4	A2	A4
chr1	7320000	7360000	B3	B2	A4	A2	A4
chr1	7360000	7400000	B3	B2	A4	A2	B1
chr1	7400000	7440000	B3	B2	A4	A2	B1
chr1	7440000	7480000	B3	B2	A4	A2	B1
chr1	7480000	7520000	B3	B2	A4	A2	B1
chr1	7520000	7560000	B3	B1	A4	A2	B1
chr1	7560000	7600000	B3	B1	A4	A2	B1
chr1	7600000	7640000	B3	B1	A4	A2	B1
chr1	7640000	7680000	B3	B1	A4	A2	B1
chr1	7680000	7720000	B3	B1	A4	A2	B1
chr1	7720000	7760000	B3	A2	A4	A2	A2
chr1	7760000	7800000	B3	A2	A4	A2	A2
chr1	7800000	7840000	A4	A2	A4	A2	A2
chr1	7840000	7880000	A4	A2	A4	A2	A2
chr1	7880000	7920000	A4	A2	A4	A2	A2
chr1	7920000	7960000	A4	A2	A4	A2	A2
chr1	7960000	8000000	A4	A2	A4	A2	A2
chr1	8000000	8040000	A2	A2	A4	A2	A2
chr1	8040000	8080000	A2	A2	A3	A1	A2
chr1	8080000	8120000	A2	A2	A3	A1	A2
chr1	8120000	8160000	A2	A2	A3	A1	A2
chr1	8160000	8200000	A2	A2	A3	A1	A2
chr1	8200000	8240000	A2	A2	A3	A1	A2
chr1	8240000	8280000	A2	A2	A3	A1	A2
chr1	8280000	8320000	A2	A2	A3	A1	A2
chr1	8320000	8360000	A2	A2	A3	A1	A2
chr1	8360000	8400000	A2	A2	A3	A1	A2
chr1	8400000	8440000	A2	A2	A1	A1	A2
chr1	8440000	8480000	A1	A1	A1	A2	A1
chr1	8480000	8520000	A1	A1	A1	A2	A1
chr1	8520000	8560000	A1	A1	A1	A2	A1
chr1	8560000	8600000	A1	A1	A1	A2	A1
chr1	8600000	8640000	A1	A1	A1	A1	A1	Common_A1
chr1	8640000	8680000	A1	A1	A1	A1	A1	Common_A1
chr1	8680000	8720000	A1	A1	A1	A1	A1	Common_A1
chr1	8720000	8760000	A1	A1	A1	A1	A1	Common_A1
chr1	8760000	8800000	A1	A1	A1	A1	A1	Common_A1
chr1	8800000	8840000	A1	A1	A1	A1	A1	Common_A1
chr1	8840000	8880000	A1	A1	A1	A1	A1	Common_A1
chr1	8880000	8920000	A1	A1	A1	A1	A1	Common_A1
chr1	8920000	8960000	A1	A1	A2	A2	A2
chr1	8960000	9000000	A2	A1	A2	A2	A2
chr1	9000000	9040000	A2	A1	A2	A2	A2
chr1	9040000	9080000	A2	A1	A2	A2	A2
chr1	9080000	9120000	A1	A1	A2	A2	A2
chr1	9120000	9160000	A1	A1	A2	A2	A2
chr1	9160000	9200000	A1	A2	A2	A1	A3
chr1	9200000	9240000	A1	A2	A1	A1	A3
chr1	9240000	9280000	A1	A2	A1	A1	A3
chr1	9280000	9320000	A1	A2	A1	A1	A1
chr1	9320000	9360000	A2	A2	A1	A1	A1
chr1	9360000	9400000	A2	A2	A1	A1	A1
chr1	9400000	9440000	A2	A2	A1	A1	A1
chr1	9440000	9480000	A2	A2	A1	A1	A1
chr1	9480000	9520000	A2	A2	A1	A1	A1
chr1	9520000	9560000	A2	A2	A1	A1	A1
chr1	9560000	9600000	A2	A2	A1	A1	A1
chr1	9600000	9640000	A1	A2	A1	A1	A1
chr1	9640000	9680000	A1	A1	A1	A1	A1	Common_A1
chr1	9680000	9720000	A1	A1	A1	A1	A1	Common_A1
chr1	9720000	9760000	A1	A1	A1	A1	A1	Common_A1
chr1	9760000	9800000	A1	A1	A1	A1	A1	Common_A1
chr1	9800000	9840000	A1	A1	A1	A1	A1	Common_A1
chr1	9840000	9880000	A1	A1	A1	A1	A1	Common_A1
chr1	9880000	9920000	A1	A1	A1	A1	A1	Common_A1
chr1	9920000	9960000	A1	A1	A1	A1	A1	Common_A1
chr1	9960000	10000000	A1	A1	A1	A1	A1	Common_A1
chr1	10000000	10040000	A1	A1	A1	A1	A1	Common_A1
chr1	10040000	10080000	A1	A1	A1	A1	A1	Common_A1
chr1	10080000	10120000	A1	A1	A1	A1	A1	Common_A1
chr1	10120000	10160000	A1	A1	A1	A1	A1	Common_A1
chr1	10160000	10200000	A1	A1	A1	A1	A1	Common_A1
chr1	10200000	10240000	A1	A1	A1	A1	A1	Common_A1
chr1	10240000	10280000	A1	A1	A1	A1	A1	Common_A1
chr1	10280000	10320000	A1	A1	A1	A1	A1	Common_A1
chr1	10320000	10360000	A1	A1	A1	A1	A1	Common_A1
chr1	10360000	10400000	A1	A1	A1	A1	A1	Common_A1
chr1	10400000	10440000	A1	A1	A1	A1	A2
chr1	10440000	10480000	A1	A1	A1	A1	A2
chr1	10480000	10520000	A1	A1	A1	A1	A2
chr1	10520000	10560000	A1	A1	A2	A1	A2
chr1	10560000	10600000	A1	A1	A2	A1	A2
chr1	10600000	10640000	A3	A1	A2	A1	A2
chr1	10640000	10680000	A3	A1	A2	A1	A2
chr1	10680000	10720000	A3	A1	A2	A1	A2
chr1	10720000	10760000	A3	A1	A2	A1	A2
chr1	10760000	10800000	A4	A1	A2	A1	A2
chr1	10800000	10840000	A4	A1	A2	A1	A2
chr1	10840000	10880000	A4	A1	A2	A1	A2
chr1	10880000	10920000	A4	A1	A2	A1	A2
chr1	10920000	10960000	A4	A1	A2	A1	A2
chr1	10960000	11000000	A4	A1	A2	A1	A2
chr1	11000000	11040000	A1	A1	A2	A1	A2
chr1	11040000	11080000	A1	A1	A1	A1	A2
chr1	11080000	11120000	A1	A1	A1	A2	A1
chr1	11120000	11160000	A1	A1	A1	A2	A1
chr1	11160000	11200000	A2	A1	A1	A2	A1
chr1	11200000	11240000	A2	A1	A1	A2	A1
chr1	11240000	11280000	A2	A1	A1	A2	A1
chr1	11280000	11320000	A2	A1	A1	A1	A1
chr1	11320000	11360000	A2	A1	A1	A1	A1
chr1	11360000	11400000	B1	A3	A1	A1	A3
chr1	11400000	11440000	B1	A3	A2	A1	A3
chr1	11440000	11480000	B1	A3	A2	A1	A3
chr1	11480000	11520000	B1	A3	A2	A1	A3
chr1	11520000	11560000	B1	A3	A2	A1	A3
chr1	11560000	11600000	B1	A3	A2	A1	A3
chr1	11600000	11640000	B1	A3	A2	A1	A3
chr1	11640000	11680000	B1	A3	A2	A1	A3
chr1	11680000	11720000	A2	A2	A2	A1	A3
chr1	11720000	11760000	A2	A2	A2	A1	A1
chr1	11760000	11800000	A2	A2	A2	A1	A1
chr1	11800000	11840000	A2	A2	A2	A1	A1
chr1	11840000	11880000	A2	A2	A2	A1	A1
chr1	11880000	11920000	A2	A2	A2	A1	A1
chr1	11920000	11960000	A2	A2	A2	A1	A1
chr1	11960000	12000000	A1	A2	A2	A1	A1
chr1	12000000	12040000	A1	A2	A2	A1	A1
chr1	12040000	12080000	A1	A2	A2	A1	A1
chr1	12080000	12120000	A1	A2	A4	A1	A1
chr1	12120000	12160000	A1	A2	A4	A2	A2
chr1	12160000	12200000	A1	A2	A4	A2	A2
chr1	12200000	12240000	A1	A2	A4	A2	A2
chr1	12240000	12280000	A1	A2	A4	A2	A2
chr1	12280000	12320000	A3	A2	A4	A2	A2
chr1	12320000	12360000	A3	A2	A4	A2	A1
chr1	12360000	12400000	A3	A2	A4	A2	A1
chr1	12400000	12440000	A3	A2	A4	A2	A1
chr1	12440000	12480000	A3	A2	A4	A2	A1
chr1	12480000	12520000	A3	A2	A4	A2	A1
chr1	12520000	12560000	B2	A2	A4	A2	A1
chr1	12560000	12600000	B2	A2	A4	A2	A1
chr1	12600000	12640000	B2	A2	A4	A2	A1
chr1	12640000	12680000	B2	A2	A4	A2	A1
chr1	12680000	12720000	B2	A2	A4	A2	A4
chr1	12720000	12760000	B2	B2	B3	B3	A4
chr1	12760000	12800000	B4	B2	B3	B3	A4
chr1	12800000	12840000	B4	B2	B3	B3	A4
chr1	12840000	12880000	B4	B2	B3	B3	A4
chr1	12880000	12920000	B4	B2	B3	B3	A4
chr1	12920000	12960000	B4	B3	B3	B3	A4
chr1	12960000	13000000	B4	B3	B3	B3	A4
chr1	13000000	13040000	B3	NA	B3	B2	B1
chr1	13040000	13080000	B3	NA	NA	B2	B1
chr1	13120000	13160000	B3	NA	B3	B2	B1
chr1	13160000	13200000	B3	B3	B2	B2	B1
chr1	13200000	13240000	B3	B3	B2	B2	B1
chr1	13320000	13360000	B3	NA	NA	B2	B1
chr1	13360000	13400000	B3	NA	NA	B2	B1
chr1	13680000	13720000	B3	NA	NA	B3	NA
chr1	13720000	13760000	B3	NA	B2	B3	NA
chr1	13760000	13800000	B3	B1	B2	B3	B1
chr1	13800000	13840000	B3	B1	B2	B3	B1
chr1	13840000	13880000	B3	B1	B2	B3	B1
chr1	13880000	13920000	B3	B1	B2	B3	B1
chr1	13920000	13960000	B3	B1	B2	B3	B1
chr1	13960000	14000000	B3	B1	B2	B3	B1
chr1	14000000	14040000	A2	B1	B2	B2	A4
chr1	14040000	14080000	A2	B1	B2	B2	A4
chr1	14080000	14120000	A2	B1	B2	B2	A4
chr1	14120000	14160000	B2	B1	B3	B2	A4
chr1	14160000	14200000	B2	B3	B3	B4	B1
chr1	14200000	14240000	B2	B3	B3	B4	B1
chr1	14240000	14280000	B2	B3	B3	B4	B1
chr1	14280000	14320000	B4	B3	B3	B4	B1
chr1	14320000	14360000	B4	B3	B3	B4	B1
chr1	14360000	14400000	B4	B3	B3	B4	B1
chr1	14400000	14440000	B4	B3	B3	B4	B1
chr1	14440000	14480000	B4	B3	B3	B4	B1
chr1	14480000	14520000	B4	B3	B3	B4	B1
chr1	14520000	14560000	B4	B3	B3	B4	B1
chr1	14560000	14600000	B4	B3	B3	B4	B1
chr1	14600000	14640000	B4	B3	B3	B4	B1
chr1	14640000	14680000	B4	B3	B3	B4	B1
chr1	14680000	14720000	B4	B3	B3	B4	A3
chr1	14720000	14760000	B4	B3	B3	B4	A3
chr1	14760000	14800000	B4	B3	B3	B4	A3
chr1	14800000	14840000	B3	B3	B3	B4	A3
chr1	14840000	14880000	B3	B3	B3	B4	A4
chr1	14880000	14920000	B3	B2	B3	B3	A4
chr1	14920000	14960000	B3	B2	B3	B3	A4
chr1	14960000	15000000	B3	B2	B3	B3	A4
chr1	15000000	15040000	B3	B2	B3	B2	A4
chr1	15040000	15080000	B3	B2	B3	B2	A4
chr1	15080000	15120000	B3	B2	B3	B2	A3
chr1	15120000	15160000	B3	B2	B3	B2	A3
chr1	15160000	15200000	B3	B2	B3	B2	A3
chr1	15200000	15240000	B2	B2	B3	B2	A3
chr1	15240000	15280000	B2	B2	B1	B2	A3
chr1	15280000	15320000	B2	B2	B1	B2	A3
chr1	15320000	15360000	B2	B2	B1	B2	A3
chr1	15360000	15400000	B2	B2	B1	B2	A4
chr1	15400000	15440000	B2	B2	B1	B2	A4
chr1	15440000	15480000	A3	A4	A3	A3	A4
chr1	15480000	15520000	A3	A4	A3	A3	A3
chr1	15520000	15560000	A3	A4	A3	A3	A3
chr1	15560000	15600000	A3	A4	A3	A3	A3
chr1	15600000	15640000	A3	A4	A3	A3	A3
chr1	15640000	15680000	A3	A3	A3	A2	A2
chr1	15680000	15720000	A3	A3	A3	A2	A2
chr1	15720000	15760000	A3	A3	A3	A2	A2
chr1	15760000	15800000	A3	A3	A3	A2	A2
chr1	15800000	15840000	A3	A3	A3	A2	A2
chr1	15840000	15880000	A1	A1	A1	A1	A1	Common_A1
chr1	15880000	15920000	A1	A1	A1	A1	A1	Common_A1
chr1	15920000	15960000	A1	A1	A1	A1	A1	Common_A1
chr1	15960000	16000000	A1	A1	A1	A1	A1	Common_A1
chr1	16000000	16040000	A1	A1	A1	A1	A1	Common_A1
chr1	16040000	16080000	A1	A1	A1	A1	A1	Common_A1
chr1	16080000	16120000	A1	A1	A1	A1	A1	Common_A1
chr1	16120000	16160000	A1	A1	A1	A1	A1	Common_A1
chr1	16160000	16200000	A1	A1	A1	A1	A1	Common_A1
chr1	16200000	16240000	A1	A1	A1	A1	A1	Common_A1
chr1	16240000	16280000	A1	A1	A1	A1	A1	Common_A1
chr1	16280000	16320000	A1	A1	A1	A1	A1	Common_A1
chr1	16320000	16360000	A2	A1	A2	A1	A2
chr1	16360000	16400000	A2	A1	A2	A1	A2
chr1	16400000	16440000	A2	A1	A2	A1	A1
chr1	16440000	16480000	A2	A1	A2	A1	A1
chr1	16480000	16520000	A2	A1	A2	A1	A1
chr1	16520000	16560000	A1	A1	A2	A1	A1
chr1	16560000	16600000	A1	A1	A2	A1	A1
chr1	16600000	16640000	A1	A1	A2	A1	A2
chr1	16640000	16680000	A1	A1	A2	A1	A2
chr1	16680000	16720000	A1	A1	A2	A1	A2
chr1	16720000	16760000	A1	A1	A2	A1	A2
chr1	16760000	16800000	A1	A1	A2	A1	A2
chr1	16800000	16840000	A1	A1	A2	A1	A2
chr1	16840000	16880000	A4	A1	A2	A1	A1
chr1	16880000	16920000	A4	A2	A3	A2	A1
chr1	16920000	16960000	A4	A2	A3	A2	A1
chr1	16960000	17000000	A4	A2	A3	A2	A1
chr1	17000000	17040000	A4	A2	A3	A2	A1
chr1	17040000	17080000	A4	A2	A3	A2	A1
chr1	17080000	17120000	A4	A2	A3	A2	A1
chr1	17120000	17160000	A4	A2	A3	A2	A1
chr1	17160000	17200000	A4	A2	A3	A2	A1
chr1	17200000	17240000	A4	A2	A3	A2	A1
chr1	17240000	17280000	A3	A2	A2	A1	A2
chr1	17280000	17320000	A3	A2	A2	A1	A2
chr1	17320000	17360000	A3	A2	A2	A1	A2
chr1	17360000	17400000	A3	A2	A2	A1	A2
chr1	17400000	17440000	A4	A2	A2	A1	A2
chr1	17440000	17480000	A4	A2	A2	A1	A2
chr1	17480000	17520000	A4	A2	A2	A1	A2
chr1	17520000	17560000	A4	A2	A2	A1	A2
chr1	17560000	17600000	B2	A2	A2	A1	A2
chr1	17600000	17640000	B2	A2	A2	A1	A2
chr1	17640000	17680000	B2	A2	A2	A1	A2
chr1	17680000	17720000	B2	A2	A2	A1	A2
chr1	17720000	17760000	A4	A2	A2	A1	A2
chr1	17760000	17800000	A4	A2	A4	A2	A2
chr1	17800000	17840000	A4	A4	A4	A2	A4
chr1	17840000	17880000	A4	A4	A4	A2	A4
chr1	17880000	17920000	B2	A4	A4	A2	A4
chr1	17920000	17960000	B2	A4	A4	A2	A4
chr1	17960000	18000000	B4	A4	A4	B1	A4
chr1	18000000	18040000	B4	A4	A4	B1	A4
chr1	18040000	18080000	B4	A4	A4	B1	A4
chr1	18080000	18120000	B4	A4	A4	B1	A4
chr1	18120000	18160000	B4	A4	A4	B1	A4
chr1	18160000	18200000	B4	A4	A4	B1	A4
chr1	18200000	18240000	B4	A4	A4	B1	B1
chr1	18240000	18280000	B4	A4	A4	B2	B1
chr1	18280000	18320000	B4	A4	A4	B2	B1
chr1	18320000	18360000	B4	A4	A4	B2	B1
chr1	18360000	18400000	B4	A4	B1	B2	B1
chr1	18400000	18440000	B4	A4	B1	B2	B1
chr1	18440000	18480000	B4	A4	B1	B2	B1
chr1	18480000	18520000	B4	A4	B1	B2	B1
chr1	18520000	18560000	B4	A4	B1	B2	B1
chr1	18560000	18600000	B2	A4	B1	B2	B1
chr1	18600000	18640000	B2	A4	B1	B2	B1
chr1	18640000	18680000	B2	A4	B1	B3	B1
chr1	18680000	18720000	B3	B1	B1	B3	A4
chr1	18720000	18760000	B3	B1	B1	B3	A4
chr1	18760000	18800000	B3	B1	B1	B3	A4
chr1	18800000	18840000	B3	B1	B1	B3	A4
chr1	18840000	18880000	B3	B1	B1	B3	A4
chr1	18880000	18920000	B3	B1	B1	B3	A4
chr1	18920000	18960000	B3	A4	A4	B1	A4
chr1	18960000	19000000	B3	A4	A4	B1	A4
chr1	19000000	19040000	B3	A4	A4	B1	A4
chr1	19040000	19080000	B3	A4	A4	B1	A4
chr1	19080000	19120000	B3	A4	A4	B1	A4
chr1	19120000	19160000	B3	A4	A4	B1	A4
chr1	19160000	19200000	B3	A4	A4	B1	A4
chr1	19200000	19240000	A3	A3	A2	A2	A2
chr1	19240000	19280000	A3	A3	A2	A2	A2
chr1	19280000	19320000	A3	A3	A2	A2	A2
chr1	19320000	19360000	A3	A3	A2	A2	A2
chr1	19360000	19400000	A3	A3	A2	A2	A2
chr1	19400000	19440000	A3	A3	A2	A2	A2
chr1	19440000	19480000	A2	A3	A2	A2	A2
chr1	19480000	19520000	A2	A2	A2	A2	A2
chr1	19520000	19560000	A2	A2	A2	A2	A2
chr1	19560000	19600000	A2	A2	A2	A2	A2
chr1	19600000	19640000	A3	A2	A3	A2	A2
chr1	19640000	19680000	A3	A2	A3	A2	A2
chr1	19680000	19720000	A3	A2	A3	A2	A2
chr1	19720000	19760000	A3	A2	A3	A2	A2
chr1	19760000	19800000	A3	A2	A3	A2	A2
chr1	19800000	19840000	A3	A2	A3	A2	A2
chr1	19840000	19880000	A3	A2	A3	A2	A2
chr1	19880000	19920000	A3	A2	A3	A2	A2
chr1	19920000	19960000	A3	A2	A3	A2	A2
chr1	19960000	20000000	A3	A2	A3	A2	A3
chr1	20000000	20040000	A3	A2	B1	A2	A3
chr1	20040000	20080000	A4	A3	B1	A2	A3
chr1	20080000	20120000	A4	A3	B1	A2	A3
chr1	20120000	20160000	A4	A3	B1	A2	A3
chr1	20160000	20200000	A4	A3	B1	A2	A3
chr1	20200000	20240000	A4	B1	B1	A2	A4
chr1	20240000	20280000	B2	B1	B1	B1	A4
chr1	20280000	20320000	B2	B1	B1	B1	A4
chr1	20320000	20360000	B2	B1	B1	B1	A4
chr1	20360000	20400000	A4	B1	B1	B1	A4
chr1	20400000	20440000	A4	B1	B1	B1	A4
chr1	20440000	20480000	A4	B1	B1	B1	A4
chr1	20480000	20520000	A4	B1	B1	B1	A3
chr1	20520000	20560000	B2	B1	A4	B1	A3
chr1	20560000	20600000	B2	B1	A4	B1	A3
chr1	20600000	20640000	B2	B1	A4	B1	A3
chr1	20640000	20680000	B2	B1	A4	B1	A3
chr1	20680000	20720000	B2	B1	A4	B1	A3
chr1	20720000	20760000	B2	B1	A4	B1	A3
chr1	20760000	20800000	B2	B1	A4	B1	A3
chr1	20800000	20840000	B1	B1	A4	B1	A3
chr1	20840000	20880000	B1	A3	A3	A2	A2
chr1	20880000	20920000	B1	A3	A3	A2	A2
chr1	20920000	20960000	B1	A3	A3	A2	A2
chr1	20960000	21000000	A2	A3	A3	A2	A2
chr1	21000000	21040000	A2	A1	A2	A2	A2
chr1	21040000	21080000	A2	A1	A2	A2	A2
chr1	21080000	21120000	A2	A1	A2	A2	A2
chr1	21120000	21160000	A2	A1	A2	A2	A2
chr1	21160000	21200000	A2	A1	A2	A2	A2
chr1	21200000	21240000	A2	A1	A2	A2	A2
chr1	21240000	21280000	A2	A1	A2	A1	A2
chr1	21280000	21320000	A1	A1	A2	A1	A2
chr1	21320000	21360000	A1	A1	A2	A1	A2
chr1	21360000	21400000	A1	A1	A2	A1	A2
chr1	21400000	21440000	A1	A1	A2	A1	A2
chr1	21440000	21480000	A1	A1	A2	A1	A2
chr1	21480000	21520000	A1	A1	A2	A1	A2
chr1	21520000	21560000	A2	A2	A2	A1	A2
chr1	21560000	21600000	A2	A2	A2	A1	A2
chr1	21600000	21640000	A2	A2	A2	A1	A2
chr1	21640000	21680000	A2	A2	A2	A1	A2
chr1	21680000	21720000	A2	A2	A2	A1	A2
chr1	21720000	21760000	A4	A2	A2	A1	A2
chr1	21760000	21800000	A4	A2	A2	A1	A2
chr1	21800000	21840000	A4	A3	A2	A1	A2
chr1	21840000	21880000	A4	A3	A2	A1	A2
chr1	21880000	21920000	A4	A3	A2	A1	A2
chr1	21920000	21960000	A4	A3	A2	A1	A2
chr1	21960000	22000000	A4	A3	A2	A1	A2
chr1	22000000	22040000	A1	A3	A2	A1	A1
chr1	22040000	22080000	A1	A2	A2	A1	A1
chr1	22080000	22120000	A1	A2	A2	A1	A1
chr1	22120000	22160000	A2	A2	A2	A1	A1
chr1	22160000	22200000	A2	A2	A2	A1	A1
chr1	22200000	22240000	A2	A2	A2	A1	A1
chr1	22240000	22280000	A2	A2	A2	A1	A1
chr1	22280000	22320000	A2	A2	A2	A1	A1
chr1	22320000	22360000	A2	A2	A2	A1	A1
chr1	22360000	22400000	A2	A2	A2	A1	A1
chr1	22400000	22440000	A2	A2	A3	A2	A2
chr1	22440000	22480000	B2	A2	A3	A2	A2
chr1	22480000	22520000	B2	A2	A3	A2	A2
chr1	22520000	22560000	B2	A2	A3	A2	A2
chr1	22560000	22600000	B2	A2	A3	A2	A2
chr1	22600000	22640000	B2	A2	A3	A2	A2
chr1	22640000	22680000	B2	A2	A3	A2	A2
chr1	22680000	22720000	B2	A2	A3	A2	A2
chr1	22720000	22760000	A4	A2	A3	A2	A2
chr1	22760000	22800000	A4	A3	A3	A3	A3
chr1	22800000	22840000	A4	A3	A3	A3	A3
chr1	22840000	22880000	B2	A3	A3	A3	A3
chr1	22880000	22920000	B2	A3	A3	A3	A3
chr1	22920000	22960000	B2	A3	A3	A3	A3
chr1	22960000	23000000	B2	A3	A3	A3	A3
chr1	23000000	23040000	B1	A3	A3	A2	A3
chr1	23040000	23080000	B1	A3	A3	A2	A3
chr1	23080000	23120000	B1	A3	A3	A2	A3
chr1	23120000	23160000	B1	A3	A3	A2	A3
chr1	23160000	23200000	B1	A3	A3	A2	A3
chr1	23200000	23240000	B1	A3	A3	A2	A3
chr1	23240000	23280000	B1	A3	A3	A2	A3
chr1	23280000	23320000	B1	A2	A1	A1	A1
chr1	23320000	23360000	A2	A2	A1	A1	A1
chr1	23360000	23400000	A2	A2	A1	A1	A1
chr1	23400000	23440000	A2	A2	A1	A1	A1
chr1	23440000	23480000	A2	A2	A1	A1	A1
chr1	23480000	23520000	A2	A2	A1	A1	A1
chr1	23520000	23560000	A2	A2	A1	A1	A1
chr1	23560000	23600000	A2	A2	A1	A1	A1
chr1	23600000	23640000	A2	A1	A1	A2	A1
chr1	23640000	23680000	A2	A1	A1	A2	A2
chr1	23680000	23720000	A2	A1	A1	A2	A2
chr1	23720000	23760000	A2	A1	A1	A2	A2
chr1	23760000	23800000	A2	A1	A1	A2	A2
chr1	23800000	23840000	A2	A1	A1	A2	A1
chr1	23840000	23880000	A1	A1	A1	A2	A1
chr1	23880000	23920000	A1	A1	A1	A2	A1
chr1	23920000	23960000	A1	A1	A1	A2	A1
chr1	23960000	24000000	A1	A1	A1	A2	A1
chr1	24000000	24040000	A1	A1	A1	A2	A1
chr1	24040000	24080000	A2	A1	A1	A2	A1
chr1	24080000	24120000	A2	A1	A2	A2	A2
chr1	24120000	24160000	A2	A1	A2	A2	A2
chr1	24160000	24200000	A2	A1	A2	A2	A2
chr1	24200000	24240000	A2	A1	A2	A2	A2
chr1	24240000	24280000	A2	A1	A2	A2	A2
chr1	24280000	24320000	A2	A1	NA	A2	A2
chr1	24320000	24360000	A2	A2	NA	A2	NA
chr1	24360000	24400000	A4	A2	A2	A2	A3
chr1	24400000	24440000	A4	A2	A3	A2	A3
chr1	24440000	24480000	A4	A2	A3	A2	A3
chr1	24480000	24520000	A4	A2	A3	A2	A3
chr1	24520000	24560000	A4	A2	A3	A2	A3
chr1	24560000	24600000	A4	A2	A3	A2	A3
chr1	24600000	24640000	A4	A2	A3	A2	A3
chr1	24640000	24680000	A4	A2	A3	A2	A3
chr1	24680000	24720000	A3	A2	A3	A2	A3
chr1	24720000	24760000	A3	A2	A3	A2	A2
chr1	24760000	24800000	A3	A2	A3	A2	A2
chr1	24800000	24840000	A3	A2	A2	A2	A2
chr1	24840000	24880000	A3	A2	A2	A2	A2
chr1	24880000	24920000	A3	A2	A2	A2	A2
chr1	24920000	24960000	A3	A2	A2	A2	A2
chr1	24960000	25000000	A1	A1	A2	A2	A2
chr1	25000000	25040000	A1	A1	A2	A2	A1
chr1	25040000	25080000	A1	A1	A2	A2	A1
chr1	25080000	25120000	A1	A1	A2	A2	A1
chr1	25120000	25160000	A1	A1	A2	A2	A1
chr1	25160000	25200000	A3	A1	A3	A2	A2
chr1	25200000	25240000	A3	A3	A3	A2	A2
chr1	25240000	25280000	A1	A3	A3	A2	A2
chr1	25280000	25320000	A1	A3	A3	A2	A2
chr1	25320000	25360000	A1	A3	A3	A2	A2
chr1	25360000	25400000	A1	A3	A3	A2	A2
chr1	25400000	25440000	A1	A3	A3	A2	A2
chr1	25440000	25480000	A1	A3	A3	A2	A2
chr1	25480000	25520000	A1	A3	A3	A2	A2
chr1	25520000	25560000	A1	A3	A3	A2	A2
chr1	25560000	25600000	A1	A1	A2	A1	A2
chr1	25600000	25640000	A1	A1	NA	A1	A2
chr1	25640000	25680000	A1	A1	A2	A1	A2
chr1	25680000	25720000	A1	A1	A2	A1	A2
chr1	25720000	25760000	A1	A1	A2	A1	A2
chr1	25760000	25800000	A1	A1	A2	A1	A2
chr1	25800000	25840000	A1	A1	A2	A1	A2
chr1	25840000	25880000	A1	A1	A2	A1	A2
chr1	25880000	25920000	A3	A1	A2	A1	A2
chr1	25920000	25960000	A3	A1	A2	A1	A2
chr1	25960000	26000000	A4	A1	A2	A1	A2
chr1	26000000	26040000	A4	A1	A2	A1	A2
chr1	26040000	26080000	A4	A1	A2	A1	A2
chr1	26080000	26120000	A4	A1	A2	A1	A2
chr1	26120000	26160000	A1	A1	A2	A1	A2
chr1	26160000	26200000	A1	A2	A2	A2	A1
chr1	26200000	26240000	A1	A2	A2	A2	A1
chr1	26240000	26280000	A2	A2	A2	A2	A1
chr1	26280000	26320000	A2	A2	A2	A2	A1
chr1	26320000	26360000	A2	A2	A2	A2	A1
chr1	26360000	26400000	A2	A2	A2	A1	A1
chr1	26400000	26440000	A2	A2	A2	A1	A1
chr1	26440000	26480000	A2	A2	A2	A1	A1
chr1	26480000	26520000	A2	A2	A2	A1	A1
chr1	26520000	26560000	A2	A2	A2	A1	A1
chr1	26560000	26600000	A1	A2	A1	A1	A1
chr1	26600000	26640000	A1	A2	A1	A2	A1
chr1	26640000	26680000	A1	A2	A1	A2	A1
chr1	26680000	26720000	A1	A2	A1	A2	A1
chr1	26720000	26760000	A1	A2	A1	A2	A1
chr1	26760000	26800000	A1	A2	A1	A2	A1
chr1	26800000	26840000	A1	A1	A1	A1	A2
chr1	26840000	26880000	A1	A1	A1	A1	A2
chr1	26880000	26920000	A1	A1	A1	A1	A2
chr1	26920000	26960000	A1	A1	A1	A1	A2
chr1	26960000	27000000	A1	A1	A1	A1	A1	Common_A1
chr1	27000000	27040000	A1	A1	A1	A1	A1	Common_A1
chr1	27040000	27080000	A1	A1	A1	A1	A1	Common_A1
chr1	27080000	27120000	A1	A1	A1	A1	A1	Common_A1
chr1	27120000	27160000	A1	A1	A1	A1	A1	Common_A1
chr1	27160000	27200000	A1	A1	A1	A1	A1	Common_A1
chr1	27200000	27240000	A1	A1	A1	A1	A1	Common_A1
chr1	27240000	27280000	A2	A1	A1	A1	A1
chr1	27280000	27320000	A2	A1	A1	A1	A2
chr1	27320000	27360000	A2	A1	A2	A1	A2
chr1	27360000	27400000	A2	A1	A2	A1	A2
chr1	27400000	27440000	A1	A1	A2	A1	A2
chr1	27440000	27480000	A1	A1	A2	A1	A2
chr1	27480000	27520000	A1	A1	A2	A1	A2
chr1	27520000	27560000	A1	A1	A2	A1	A2
chr1	27560000	27600000	A1	A1	A2	A1	A2
chr1	27600000	27640000	A1	A2	A2	A1	A2
chr1	27640000	27680000	A1	A2	A2	A3	A2
chr1	27680000	27720000	A1	A2	A2	A3	A2
chr1	27720000	27760000	A1	A2	A1	A1	A2
chr1	27760000	27800000	A1	A2	A1	A1	A2
chr1	27800000	27840000	A1	A2	A1	A1	A2
chr1	27840000	27880000	A1	A2	A1	A1	A2
chr1	27880000	27920000	A1	A2	A1	A1	A2
chr1	27920000	27960000	A1	A2	A1	A1	A1
chr1	27960000	28000000	A1	A2	A1	A1	A1
chr1	28000000	28040000	A1	A1	A1	A2	A1
chr1	28040000	28080000	A1	A1	A1	A2	A1
chr1	28080000	28120000	A1	A1	A1	A2	A1
chr1	28120000	28160000	A1	A1	A1	A2	A1
chr1	28160000	28200000	A1	A1	A1	A2	A1
chr1	28200000	28240000	A1	A1	A1	A2	A1
chr1	28240000	28280000	A1	A1	A1	A2	A1
chr1	28280000	28320000	A1	A1	A1	A2	A1
chr1	28320000	28360000	A1	A1	A1	A2	A1
chr1	28360000	28400000	A1	A1	A1	A1	A1	Common_A1
chr1	28400000	28440000	A1	A1	A1	A1	A1	Common_A1
chr1	28440000	28480000	A1	A1	A1	A1	A1	Common_A1
chr1	28480000	28520000	A1	A1	A1	A1	A1	Common_A1
chr1	28520000	28560000	A1	A1	A1	A1	A1	Common_A1
chr1	28560000	28600000	A1	A1	A1	A1	A1	Common_A1
chr1	28600000	28640000	A1	A1	A1	A1	A1	Common_A1
chr1	28640000	28680000	A1	A1	A1	A1	A1	Common_A1
chr1	28680000	28720000	A1	A1	A1	A1	A1	Common_A1
chr1	28720000	28760000	A1	A1	A1	A1	A1	Common_A1
chr1	28760000	28800000	A1	A1	A1	A1	A1	Common_A1
chr1	28800000	28840000	A1	A1	A1	A1	A1	Common_A1
chr1	28840000	28880000	A1	A1	A1	A1	A1	Common_A1
chr1	28880000	28920000	A1	A1	A1	A1	A1	Common_A1
chr1	28920000	28960000	A1	A1	A1	A1	A1	Common_A1
chr1	28960000	29000000	A1	A2	A1	A1	A1
chr1	29000000	29040000	A2	A2	A1	A1	A1
chr1	29040000	29080000	A2	A2	A1	A1	A1
chr1	29080000	29120000	A2	A2	A1	A1	A2
chr1	29120000	29160000	A2	A2	A1	A1	A2
chr1	29160000	29200000	A2	A2	A1	A1	A2
chr1	29200000	29240000	A2	A2	A1	A1	A2
chr1	29240000	29280000	A2	A2	A1	A1	A2
chr1	29280000	29320000	A2	A2	A1	A1	A2
chr1	29320000	29360000	A2	A2	A1	A1	A2
chr1	29360000	29400000	A2	A2	A1	A1	A2
chr1	29400000	29440000	A2	A2	A1	A1	A2
chr1	29440000	29480000	A2	A2	A1	A1	A2
chr1	29480000	29520000	A2	A2	A1	A1	A2
chr1	29520000	29560000	A2	A3	A1	A1	A2
chr1	29560000	29600000	B3	A3	B1	A4	A4
chr1	29600000	29640000	B3	A3	NA	A4	A4
chr1	29640000	29680000	B3	A3	B1	A4	A4
chr1	29680000	29720000	B3	A3	B1	A4	A4
chr1	29720000	29760000	B3	A3	B1	A4	A4
chr1	29760000	29800000	B3	A3	B1	A4	A4
chr1	29800000	29840000	B3	A3	B1	B2	B1
chr1	29840000	29880000	B3	B2	B2	B2	B1
chr1	30000000	30040000	B3	B2	B2	B2	B1
chr1	30040000	30080000	B3	B2	B2	B2	B1
chr1	30080000	30120000	B3	B2	B2	B2	B1
chr1	30120000	30160000	B3	B2	B2	B2	B1
chr1	30160000	30200000	B3	B2	B2	B2	B1
chr1	30200000	30240000	B3	B2	B2	B2	B1
chr1	30240000	30280000	B3	B2	B2	B3	B1
chr1	30280000	30320000	B3	B2	B2	B3	B1
chr1	30320000	30360000	B3	B2	B2	B3	B1
chr1	30360000	30400000	B3	B2	B2	B3	B1
chr1	30400000	30440000	B4	B2	B2	B3	B1
chr1	30440000	30480000	B4	B2	B2	B3	B1
chr1	30480000	30520000	B4	B2	B1	B3	B1
chr1	30520000	30560000	B4	B2	B1	B3	B1
chr1	30560000	30600000	B4	B2	B1	B3	A4
chr1	30600000	30640000	B4	B2	B1	B3	A4
chr1	30640000	30680000	B4	B2	B1	B3	A4
chr1	30680000	30720000	B4	B2	B1	B3	A4
chr1	30720000	30760000	B4	B2	B1	B3	B1
chr1	30760000	30800000	B4	B2	B1	B3	B1
chr1	30800000	30840000	B4	B2	B1	B3	B1
chr1	30840000	30880000	B4	B2	B1	B3	B1
chr1	30880000	30920000	B4	B2	B1	B3	B1
chr1	30920000	30960000	B4	B2	B1	B3	A4
chr1	30960000	31000000	B4	B2	B1	B3	A4
chr1	31000000	31040000	B4	B2	B1	B3	A4
chr1	31040000	31080000	B4	B2	B1	B3	A4
chr1	31080000	31120000	B4	B2	B1	B3	A4
chr1	31120000	31160000	B4	B2	B1	B3	A4
chr1	31160000	31200000	A2	B2	B1	B3	A4
chr1	31200000	31240000	A2	A3	A1	A2	A1
chr1	31240000	31280000	A2	A3	A1	A2	A1
chr1	31280000	31320000	A2	A3	A1	A2	A1
chr1	31320000	31360000	A2	A3	A1	A2	A1
chr1	31360000	31400000	A2	A3	A1	A2	A1
chr1	31400000	31440000	A1	A1	A1	A2	A1
chr1	31440000	31480000	A1	A1	A1	A2	A1
chr1	31480000	31520000	A1	A1	A1	A2	A1
chr1	31520000	31560000	A1	A1	A1	A2	A1
chr1	31560000	31600000	A4	A1	A1	A2	A1
chr1	31600000	31640000	A4	A1	A1	A2	A1
chr1	31640000	31680000	A4	A2	A1	A1	A2
chr1	31680000	31720000	A4	A2	A1	A1	A2
chr1	31720000	31760000	A2	A2	A1	A1	A2
chr1	31760000	31800000	A2	A2	A1	A1	A2
chr1	31800000	31840000	A2	A2	A1	A1	A2
chr1	31840000	31880000	A2	A2	A1	A1	A2
chr1	31880000	31920000	A2	A2	A3	A1	A2
chr1	31920000	31960000	A2	A2	A3	A1	A2
chr1	31960000	32000000	A2	A2	A3	A1	A2
chr1	32000000	32040000	A2	A2	A3	A1	A2
chr1	32040000	32080000	A2	A2	A1	A1	A2
chr1	32080000	32120000	A2	A2	A1	A1	A1
chr1	32120000	32160000	A2	A2	A1	A1	A1
chr1	32160000	32200000	A2	A2	A1	A1	A1
chr1	32200000	32240000	A2	A2	A1	A1	A1
chr1	32240000	32280000	A2	A2	A1	A1	A1
chr1	32280000	32320000	A2	A2	A1	A1	A1
chr1	32320000	32360000	A1	A2	A1	A1	A1
chr1	32360000	32400000	A1	A1	A1	A1	A1	Common_A1
chr1	32400000	32440000	A1	A1	A1	A1	A1	Common_A1
chr1	32440000	32480000	A1	A1	A1	A1	A1	Common_A1
chr1	32480000	32520000	A1	A1	A1	A1	A1	Common_A1
chr1	32520000	32560000	A1	A1	A1	A1	A1	Common_A1
chr1	32560000	32600000	A1	A1	A1	A1	A1	Common_A1
chr1	32600000	32640000	A1	A1	A1	A1	A1	Common_A1
chr1	32640000	32680000	A1	A1	A1	A1	A1	Common_A1
chr1	32680000	32720000	A1	A1	A1	A1	A1	Common_A1
chr1	32720000	32760000	A1	A1	A1	A1	A1	Common_A1
chr1	32760000	32800000	A1	A1	A1	A1	A1	Common_A1
chr1	32800000	32840000	A1	A1	A1	A1	A1	Common_A1
chr1	32840000	32880000	A2	A1	A1	A1	A1
chr1	32880000	32920000	A2	A1	A1	A1	A1
chr1	32920000	32960000	A2	A1	A1	A1	A1
chr1	32960000	33000000	A2	A1	A1	A1	A1
chr1	33000000	33040000	A2	A1	A1	A1	A1
chr1	33040000	33080000	A1	A1	A1	A1	A1	Common_A1
chr1	33080000	33120000	A1	A1	A1	A1	A1	Common_A1
chr1	33120000	33160000	A1	A1	A1	A1	A1	Common_A1
chr1	33160000	33200000	A1	A1	A1	A1	A1	Common_A1
chr1	33200000	33240000	A1	A1	A1	A1	A1	Common_A1
chr1	33240000	33280000	A1	A1	A1	A1	A1	Common_A1
chr1	33280000	33320000	A1	A1	A2	A1	A1
chr1	33320000	33360000	A1	A1	A2	A1	A1
chr1	33360000	33400000	A1	A2	A2	A1	A1
chr1	33400000	33440000	A1	A2	A2	A1	A1
chr1	33440000	33480000	A1	A2	A2	A1	A1
chr1	33480000	33520000	A1	A2	A2	A1	A1
chr1	33520000	33560000	A1	A2	A2	A1	A1
chr1	33560000	33600000	A1	A2	A2	A3	A2
chr1	33600000	33640000	A3	A2	A3	A3	A2
chr1	33640000	33680000	A3	A2	A3	A3	A2
chr1	33680000	33720000	A3	A2	A3	A3	A2
chr1	33720000	33760000	A3	A2	A3	A3	A2
chr1	33760000	33800000	A3	A2	A3	A3	A2
chr1	33800000	33840000	A3	A2	A3	A3	A2
chr1	33840000	33880000	A3	A2	A3	A3	A2
chr1	33880000	33920000	A3	A2	A3	A3	A2
chr1	33920000	33960000	A3	A2	B2	A3	A2
chr1	33960000	34000000	B3	B2	B2	B3	B2
chr1	34000000	34040000	B3	B2	B2	B3	B2
chr1	34040000	34080000	B3	B2	B2	B3	B2
chr1	34080000	34120000	B3	B2	B2	B3	B2
chr1	34120000	34160000	B4	B4	B2	B4	B2
chr1	34160000	34200000	B4	B4	B4	B4	B2
chr1	34200000	34240000	B4	B4	B4	B4	B2
chr1	34240000	34280000	B4	B4	B4	B4	B2
chr1	34280000	34320000	B4	B4	B4	B4	B2
chr1	34320000	34360000	B4	B4	B4	B4	B2
chr1	34360000	34400000	B4	B4	B4	B4	B2
chr1	34400000	34440000	B4	B4	B4	B4	B2
chr1	34440000	34480000	B4	B4	B4	B4	B2
chr1	34480000	34520000	B4	B4	B4	B4	B2
chr1	34520000	34560000	B4	B4	B4	B4	B2
chr1	34560000	34600000	B4	B4	B4	B4	B2
chr1	34600000	34640000	B4	B4	B4	B4	B2
chr1	34640000	34680000	B4	B4	B4	B4	B2
chr1	34680000	34720000	B4	B4	B4	B4	B2
chr1	34720000	34760000	B4	B4	B4	B4	B2
chr1	34760000	34800000	B3	B4	B4	B4	B2
chr1	34800000	34840000	B3	B4	B4	B4	B2
chr1	34840000	34880000	B3	B4	B4	B4	B2
chr1	34880000	34920000	B3	B4	B4	B4	B2
chr1	34920000	34960000	B3	B4	B4	B4	B2
chr1	34960000	35000000	B2	B4	B4	B4	B2
chr1	35000000	35040000	B2	B4	B4	B4	B2
chr1	35040000	35080000	B2	B4	B4	B4	B2
chr1	35080000	35120000	B3	B4	B4	B4	B2
chr1	35120000	35160000	B3	B4	B4	B4	B2
chr1	35160000	35200000	B3	B4	B4	B4	B2
chr1	35200000	35240000	B3	B4	A4	A4	B2
chr1	35240000	35280000	A4	A3	A4	A4	A3
chr1	35280000	35320000	A4	A3	A4	A4	A3
chr1	35320000	35360000	A4	A3	A4	A4	A3
chr1	35360000	35400000	A4	A3	A4	A4	A3
chr1	35400000	35440000	A4	A3	A4	A4	A3
chr1	35440000	35480000	A2	A2	A4	A3	A2
chr1	35480000	35520000	A2	A2	A3	A3	A2
chr1	35520000	35560000	A2	A2	A3	A3	A2
chr1	35560000	35600000	A2	A2	A3	A3	A2
chr1	35600000	35640000	A2	A2	A2	A3	A2
chr1	35640000	35680000	A1	A1	A2	A1	A1
chr1	35680000	35720000	A1	A1	A2	A1	A1
chr1	35720000	35760000	A1	A1	A2	A1	A1
chr1	35760000	35800000	A1	A1	A2	A1	A1
chr1	35800000	35840000	A1	A1	A2	A1	A1
chr1	35840000	35880000	A1	A1	A2	A1	A2
chr1	35880000	35920000	A1	A1	A2	A1	A2
chr1	35920000	35960000	A1	A1	A2	A1	A2
chr1	35960000	36000000	A1	A1	A2	A1	A2
chr1	36000000	36040000	A1	A1	A2	A1	A2
chr1	36040000	36080000	A1	A1	A2	A1	A1
chr1	36080000	36120000	A1	A1	A2	A1	A1
chr1	36120000	36160000	A1	A1	A2	A1	A1
chr1	36160000	36200000	A1	A1	A2	A1	A1
chr1	36200000	36240000	A1	A1	A2	A1	A1
chr1	36240000	36280000	A1	A1	A1	A1	A1	Common_A1
chr1	36280000	36320000	A1	A1	A1	A1	A1	Common_A1
chr1	36320000	36360000	A1	A1	A1	A1	A1	Common_A1
chr1	36360000	36400000	A1	A1	A1	A1	A1	Common_A1
chr1	36400000	36440000	A1	A1	A1	A1	A1	Common_A1
chr1	36440000	36480000	A1	A1	A1	A1	A1	Common_A1
chr1	36480000	36520000	A1	A1	A1	A1	A1	Common_A1
chr1	36520000	36560000	A1	A1	A1	A1	A1	Common_A1
chr1	36560000	36600000	A1	A1	A2	A1	A1
chr1	36600000	36640000	A1	A1	A2	A1	A1
chr1	36640000	36680000	A1	A1	A2	A1	A1
chr1	36680000	36720000	A1	A1	A2	A1	A1
chr1	36720000	36760000	A1	A1	A2	A1	A1
chr1	36760000	36800000	A1	A1	A2	A2	A1
chr1	36800000	36840000	A1	A1	A2	A2	A1
chr1	36840000	36880000	A1	A1	A2	A2	A1
chr1	36880000	36920000	A1	A1	A2	A2	A1
chr1	36920000	36960000	A1	A1	B1	A2	A1
chr1	36960000	37000000	B3	A4	B1	B2	A4
chr1	37000000	37040000	B3	A4	B1	B2	A4
chr1	37040000	37080000	B3	A4	B1	B2	A4
chr1	37080000	37120000	B3	A4	B1	B2	A4
chr1	37120000	37160000	B3	A4	B1	B2	A4
chr1	37160000	37200000	B3	A4	B1	B2	A4
chr1	37200000	37240000	B3	A4	B1	B2	A4
chr1	37240000	37280000	B3	A4	B1	B2	A4
chr1	37280000	37320000	B3	A4	B1	B2	A4
chr1	37320000	37360000	B3	A4	B1	B2	A4
chr1	37360000	37400000	B3	A4	B1	B2	A4
chr1	37400000	37440000	B3	A4	B1	B2	A4
chr1	37440000	37480000	B3	A4	B1	B2	A4
chr1	37480000	37520000	B3	A4	B1	B2	A4
chr1	37520000	37560000	B3	A4	B1	B2	A4
chr1	37560000	37600000	B3	A4	B2	B2	A4
chr1	37600000	37640000	B3	A4	B2	B2	A4
chr1	37640000	37680000	B3	A4	B2	B2	A4
chr1	37680000	37720000	B2	A4	B2	B2	A4
chr1	37720000	37760000	B2	A4	B2	B2	A4
chr1	37760000	37800000	B2	A4	B2	B2	A4
chr1	37800000	37840000	B2	A4	B2	B2	A4
chr1	37840000	37880000	B2	A4	B2	B2	A4
chr1	37880000	37920000	B2	A4	B2	B2	A4
chr1	37920000	37960000	A2	A4	A2	A2	A1
chr1	37960000	38000000	A2	A2	A2	A2	A1
chr1	38000000	38040000	A2	A2	A2	A2	A1
chr1	38040000	38080000	A2	A2	A2	A2	A1
chr1	38080000	38120000	A2	A2	A2	A2	A1
chr1	38120000	38160000	A2	A2	A2	A2	A1
chr1	38160000	38200000	A2	A3	A2	A3	A1
chr1	38200000	38240000	A2	A3	A2	A3	A1
chr1	38240000	38280000	A2	A1	A2	A3	A1
chr1	38280000	38320000	A1	A1	A2	A1	A1
chr1	38320000	38360000	A1	A1	A2	A1	A1
chr1	38360000	38400000	A1	A1	A2	A1	A1
chr1	38400000	38440000	A1	A1	A2	A1	A1
chr1	38440000	38480000	A1	A1	A4	A1	A1
chr1	38480000	38520000	A1	A3	A4	B2	A3
chr1	38520000	38560000	A4	A3	A4	B2	A3
chr1	38560000	38600000	A4	A3	A4	B2	A3
chr1	38600000	38640000	A4	A3	A4	B2	A3
chr1	38640000	38680000	A4	A3	A4	B2	A3
chr1	38680000	38720000	B2	A3	A4	B2	A3
chr1	38720000	38760000	B2	A3	A4	B2	A3
chr1	38760000	38800000	B2	A3	A4	B2	A3
chr1	38800000	38840000	B2	A3	A4	B2	A3
chr1	38840000	38880000	B2	A3	A4	B2	A3
chr1	38880000	38920000	B2	A3	A4	B2	A3
chr1	38920000	38960000	A3	A3	A4	B2	A3
chr1	38960000	39000000	A3	A3	A4	B2	A2
chr1	39000000	39040000	A3	A3	A4	B2	A2
chr1	39040000	39080000	A3	A3	A4	B2	A2
chr1	39080000	39120000	B2	A3	A3	B2	A2
chr1	39120000	39160000	B2	A3	A3	B2	A2
chr1	39160000	39200000	B2	A3	A3	B2	A2
chr1	39200000	39240000	B2	A3	A3	B2	A2
chr1	39240000	39280000	B2	A3	A3	B2	A2
chr1	39280000	39320000	A2	A3	A3	B2	A2
chr1	39320000	39360000	A2	A2	A3	A2	A1
chr1	39360000	39400000	A2	A2	A3	A2	A1
chr1	39400000	39440000	A2	A2	A3	A2	A1
chr1	39440000	39480000	A2	A2	A3	A2	A1
chr1	39480000	39520000	A1	A2	A1	A2	A1
chr1	39520000	39560000	A1	A2	A1	A2	A1
chr1	39560000	39600000	A1	A2	A1	A2	A1
chr1	39600000	39640000	A1	A2	A1	A2	A1
chr1	39640000	39680000	A1	A2	A1	A2	A1
chr1	39680000	39720000	A1	A2	A1	A2	A1
chr1	39720000	39760000	A1	A2	A1	A2	A1
chr1	39760000	39800000	A1	A2	A1	A2	A1
chr1	39800000	39840000	A1	A2	A1	A2	A1
chr1	39840000	39880000	A1	A2	A1	A2	A1
chr1	39880000	39920000	A1	A2	A1	A2	A1
chr1	39920000	39960000	A1	A2	A1	A2	A1
chr1	39960000	40000000	A1	A2	A1	A2	A1
chr1	40000000	40040000	A1	A2	A1	A2	A1
chr1	40040000	40080000	A1	A2	A2	A2	A1
chr1	40080000	40120000	A1	A2	A2	A2	A1
chr1	40120000	40160000	A1	A2	A2	A2	A1
chr1	40160000	40200000	A1	A2	A2	A2	A1
chr1	40200000	40240000	A1	A2	A2	A2	A1
chr1	40240000	40280000	A1	A1	A1	A1	A1	Common_A1
chr1	40280000	40320000	A1	A1	A1	A1	A1	Common_A1
chr1	40320000	40360000	A1	A1	A1	A1	A1	Common_A1
chr1	40360000	40400000	A1	A1	A1	A1	A1	Common_A1
chr1	40400000	40440000	A1	A1	A1	A1	A1	Common_A1
chr1	40440000	40480000	A1	A1	A1	A1	A1	Common_A1
chr1	40480000	40520000	A1	A1	A1	A1	A1	Common_A1
chr1	40520000	40560000	A1	A1	A1	A1	A1	Common_A1
chr1	40560000	40600000	A1	A1	A1	A1	A1	Common_A1
chr1	40600000	40640000	A1	A1	A1	A1	A1	Common_A1
chr1	40640000	40680000	A1	A1	A1	A1	A1	Common_A1
chr1	40680000	40720000	A1	A1	A1	A1	A1	Common_A1
chr1	40720000	40760000	A1	A1	A1	A1	A1	Common_A1
chr1	40760000	40800000	A1	A1	A1	A1	A1	Common_A1
chr1	40800000	40840000	A1	A1	A1	A1	A1	Common_A1
chr1	40840000	40880000	A1	A1	A1	A1	A1	Common_A1
chr1	40880000	40920000	A1	A1	A1	A1	A1	Common_A1
chr1	40920000	40960000	A1	A1	A2	A1	A1
chr1	40960000	41000000	A2	A1	A2	A2	A1
chr1	41000000	41040000	A2	A1	A2	A2	A1
chr1	41040000	41080000	A2	A1	A2	A2	A1
chr1	41080000	41120000	A2	A1	A2	A2	A1
chr1	41120000	41160000	A1	A1	A2	A2	A1
chr1	41160000	41200000	A1	A1	A2	A2	A1
chr1	41200000	41240000	A1	A1	A2	A2	A1
chr1	41240000	41280000	A1	A1	A2	A3	A1
chr1	41280000	41320000	A2	A2	A2	A3	A1
chr1	41320000	41360000	A2	A2	A2	A1	A1
chr1	41360000	41400000	A2	A2	A2	A1	A1
chr1	41400000	41440000	A2	A2	A2	A1	A1
chr1	41440000	41480000	A2	A2	A2	A1	A1
chr1	41480000	41520000	A2	A3	A4	A2	A3
chr1	41520000	41560000	A2	A3	A4	A2	A3
chr1	41560000	41600000	A2	A3	A4	A2	A3
chr1	41600000	41640000	A2	A3	A4	A2	A3
chr1	41640000	41680000	A2	A3	A4	A2	A3
chr1	41680000	41720000	A2	A3	A4	A2	A3
chr1	41720000	41760000	A4	A3	A4	A2	A3
chr1	41760000	41800000	A4	A3	A4	A2	A3
chr1	41800000	41840000	A4	A3	A4	A2	A3
chr1	41840000	41880000	A4	A3	A4	A2	A3
chr1	41880000	41920000	A4	A3	A4	A2	A3
chr1	41920000	41960000	A4	A3	A4	A2	A4
chr1	41960000	42000000	A4	B1	B1	A3	A4
chr1	42000000	42040000	A4	B1	B1	A3	A4
chr1	42040000	42080000	A4	B1	B1	A3	A4
chr1	42080000	42120000	A1	B1	B1	A3	A4
chr1	42120000	42160000	A1	B1	B1	A3	A4
chr1	42160000	42200000	A1	B1	B1	A3	A4
chr1	42200000	42240000	A1	B1	B1	A3	A4
chr1	42240000	42280000	A2	B1	B1	A3	A4
chr1	42280000	42320000	A2	B1	B1	A3	A4
chr1	42320000	42360000	A2	B1	B1	A3	A4
chr1	42360000	42400000	A2	B1	B1	A3	A4
chr1	42400000	42440000	A2	B1	B1	A3	A4
chr1	42440000	42480000	A2	B1	B1	A3	A4
chr1	42480000	42520000	A2	B1	B1	A3	A4
chr1	42520000	42560000	A4	B1	B1	A3	A4
chr1	42560000	42600000	A4	B1	B1	A3	A4
chr1	42600000	42640000	A4	A3	A3	A3	A4
chr1	42640000	42680000	A2	A3	A3	A2	A3
chr1	42680000	42720000	A2	A3	A3	A2	A3
chr1	42720000	42760000	A2	A3	A3	A2	A3
chr1	42760000	42800000	A2	A3	A3	A2	A3
chr1	42800000	42840000	A4	A3	A3	A2	A4
chr1	42840000	42880000	A4	A3	A3	A2	A4
chr1	42880000	42920000	A4	A3	A3	A2	A4
chr1	42920000	42960000	A4	A3	A3	A2	A4
chr1	42960000	43000000	A4	A4	A3	A2	A4
chr1	43000000	43040000	A4	A4	A3	A2	A4
chr1	43040000	43080000	A4	A4	A3	A2	A4
chr1	43080000	43120000	A4	A4	A3	A2	A2
chr1	43120000	43160000	A2	A2	A3	A2	A2
chr1	43160000	43200000	A2	A2	A3	A2	A2
chr1	43200000	43240000	A2	A2	A3	A2	A1
chr1	43240000	43280000	A2	A1	A3	A2	A1
chr1	43280000	43320000	A2	A1	A3	A2	A1
chr1	43320000	43360000	A2	A1	A3	A2	A1
chr1	43360000	43400000	A2	A1	A3	A2	A1
chr1	43400000	43440000	A2	A1	A3	A2	A1
chr1	43440000	43480000	B1	A1	A3	A2	A1
chr1	43480000	43520000	B1	A1	A3	A2	A1
chr1	43520000	43560000	B1	A1	A3	A2	A2
chr1	43560000	43600000	B1	A1	A3	A2	A2
chr1	43600000	43640000	A2	A2	A3	A2	A2
chr1	43640000	43680000	A2	A2	A2	A2	A2
chr1	43680000	43720000	A2	A2	A2	A2	A2
chr1	43720000	43760000	A2	A2	A2	A2	A2
chr1	43760000	43800000	A2	A2	A2	A2	A2
chr1	43800000	43840000	A2	A2	A2	A2	A2
chr1	43840000	43880000	A2	A2	A2	A2	A2
chr1	43880000	43920000	A2	A2	A3	A2	A2
chr1	43920000	43960000	A3	A2	A3	A1	A2
chr1	43960000	44000000	A3	A2	A3	A1	A2
chr1	44000000	44040000	A3	A2	A3	A1	A1
chr1	44040000	44080000	A3	A2	A3	A1	A1
chr1	44080000	44120000	A3	A2	A3	A1	A1
chr1	44120000	44160000	A2	A2	A3	A1	A1
chr1	44160000	44200000	A2	A2	A2	A1	A1
chr1	44200000	44240000	A2	A2	A2	A2	A1
chr1	44240000	44280000	A1	A2	A2	A2	A2
chr1	44280000	44320000	A1	A2	A2	A2	A2
chr1	44320000	44360000	A1	A2	A2	A2	A2
chr1	44360000	44400000	A1	A2	A2	A2	A2
chr1	44400000	44440000	A1	A2	A2	A2	A2
chr1	44440000	44480000	A1	A2	A2	A1	A1
chr1	44480000	44520000	A1	A2	A1	A1	A1
chr1	44520000	44560000	A4	A1	A1	A1	A1
chr1	44560000	44600000	A4	A1	A1	A1	A1
chr1	44600000	44640000	A4	A1	A1	A1	A1
chr1	44640000	44680000	A4	A1	A1	A1	A1
chr1	44680000	44720000	A4	A1	A1	A1	A1
chr1	44720000	44760000	A4	A1	A1	A1	A1
chr1	44760000	44800000	A4	A1	A1	A1	A1
chr1	44800000	44840000	A4	A1	A1	A1	A2
chr1	44840000	44880000	B2	A1	A1	A1	A2
chr1	44880000	44920000	B2	A1	A1	A1	A2
chr1	44920000	44960000	B2	A1	A1	A1	A2
chr1	44960000	45000000	B2	A1	A1	A1	A2
chr1	45000000	45040000	B2	A1	A1	A1	A2
chr1	45040000	45080000	B2	A1	A1	A1	A2
chr1	45080000	45120000	B2	A1	A1	A1	A2
chr1	45120000	45160000	A1	A1	A1	A1	A2
chr1	45160000	45200000	A1	A1	A1	A1	A1	Common_A1
chr1	45200000	45240000	A1	A1	A2	A1	A1
chr1	45240000	45280000	A1	A1	A2	A1	A1
chr1	45280000	45320000	A1	A1	A2	A1	A1
chr1	45320000	45360000	A2	A1	A2	A1	A1
chr1	45360000	45400000	A2	A1	A2	A1	A1
chr1	45400000	45440000	A2	A1	A2	A1	A1
chr1	45440000	45480000	A2	A1	A2	A1	A1
chr1	45480000	45520000	A2	A2	A2	A1	A1
chr1	45520000	45560000	B1	A2	A2	A1	A2
chr1	45560000	45600000	B1	A2	A2	A1	A2
chr1	45600000	45640000	B1	A2	A2	A1	A2
chr1	45640000	45680000	B1	A2	A2	A1	A2
chr1	45680000	45720000	B1	A2	A2	A1	A2
chr1	45720000	45760000	B1	A2	A2	A1	A2
chr1	45760000	45800000	A1	A1	A1	A1	A1	Common_A1
chr1	45800000	45840000	A1	A1	A1	A1	A1	Common_A1
chr1	45840000	45880000	A1	A1	A1	A1	A1	Common_A1
chr1	45880000	45920000	A1	A1	A1	A1	A1	Common_A1
chr1	45920000	45960000	A1	A1	A1	A1	A1	Common_A1
chr1	45960000	46000000	A1	A1	A1	A1	A1	Common_A1
chr1	46000000	46040000	A1	A1	A1	A1	A1	Common_A1
chr1	46040000	46080000	A1	A1	A2	A1	A1
chr1	46080000	46120000	A1	A1	A2	A1	A1
chr1	46120000	46160000	A1	A1	A1	A1	A1	Common_A1
chr1	46160000	46200000	A1	A1	A1	A1	A1	Common_A1
chr1	46200000	46240000	A1	A1	A1	A1	A1	Common_A1
chr1	46240000	46280000	A1	A1	A1	A1	A1	Common_A1
chr1	46280000	46320000	A1	A1	A1	A1	A1	Common_A1
chr1	46320000	46360000	A1	A1	A1	A1	A1	Common_A1
chr1	46360000	46400000	A1	A1	A1	A1	A1	Common_A1
chr1	46400000	46440000	A1	A1	A1	A1	A1	Common_A1
chr1	46440000	46480000	A1	A1	A3	A1	A1
chr1	46480000	46520000	A1	A1	A3	A1	A1
chr1	46520000	46560000	A1	A1	A1	A1	A1	Common_A1
chr1	46560000	46600000	A1	A1	A1	A1	A1	Common_A1
chr1	46600000	46640000	A1	A1	A1	A1	A1	Common_A1
chr1	46640000	46680000	A1	A1	A1	A1	A1	Common_A1
chr1	46680000	46720000	A1	A1	A1	A1	A1	Common_A1
chr1	46720000	46760000	A1	A1	A1	A1	A1	Common_A1
chr1	46760000	46800000	A1	A1	A1	A1	A1	Common_A1
chr1	46800000	46840000	A1	A1	A2	A1	A1
chr1	46840000	46880000	A4	A1	A2	A1	A1
chr1	46880000	46920000	A4	A1	A2	A1	A1
chr1	46920000	46960000	A4	A1	A2	A1	A1
chr1	46960000	47000000	A4	A1	A2	A1	A1
chr1	47000000	47040000	A4	A1	A2	A1	A1
chr1	47040000	47080000	A2	A1	A2	A1	A1
chr1	47080000	47120000	A2	A1	A2	A1	A1
chr1	47120000	47160000	A2	A1	A2	A1	A1
chr1	47160000	47200000	A2	A1	A2	A1	A1
chr1	47200000	47240000	B4	B2	B1	B1	A4
chr1	47240000	47280000	B4	B2	B1	B1	A4
chr1	47280000	47320000	B4	B2	B1	B1	A4
chr1	47320000	47360000	B4	B2	B1	B1	A4
chr1	47360000	47400000	B4	B2	B1	B1	A4
chr1	47400000	47440000	B4	B2	B1	B1	A4
chr1	47440000	47480000	B4	B2	B1	B1	A4
chr1	47480000	47520000	B4	B2	B1	B1	A4
chr1	47520000	47560000	B4	B2	B1	B1	A4
chr1	47560000	47600000	B4	B2	B1	B1	A4
chr1	47600000	47640000	B4	B2	B1	B1	A4
chr1	47640000	47680000	B4	A2	A2	A1	A1
chr1	47680000	47720000	B4	A2	A2	A1	A1
chr1	47720000	47760000	A2	A2	A2	A1	A1
chr1	47760000	47800000	A2	A2	A2	A1	A1
chr1	47800000	47840000	A2	A2	A2	A1	A1
chr1	47840000	47880000	B3	B1	A3	A4	A3
chr1	47880000	47920000	B3	B1	A3	A4	A3
chr1	47920000	47960000	B3	B1	A3	A4	A3
chr1	47960000	48000000	B3	B1	A3	A4	A3
chr1	48000000	48040000	B3	B1	A3	A4	A3
chr1	48040000	48080000	B3	B1	A3	A4	A3
chr1	48080000	48120000	B3	B1	A3	A4	A3
chr1	48120000	48160000	B3	B1	A3	A4	A3
chr1	48160000	48200000	B3	B1	A3	A4	A3
chr1	48200000	48240000	B3	B3	B1	A3	A3
chr1	48240000	48280000	B4	B3	B1	A3	B1
chr1	48280000	48320000	B4	B3	B1	A3	B1
chr1	48320000	48360000	B4	B3	B1	A3	B1
chr1	48360000	48400000	B4	B3	B1	A3	B1
chr1	48400000	48440000	B4	B3	B1	A3	B1
chr1	48440000	48480000	B4	B3	B1	A3	B1
chr1	48480000	48520000	B4	B3	B1	A3	B1
chr1	48520000	48560000	B4	B4	B1	A3	B3
chr1	48560000	48600000	B4	B4	B3	B2	B3
chr1	48600000	48640000	B4	B4	B3	B2	B3
chr1	48640000	48680000	B4	B4	B3	B2	B3
chr1	48680000	48720000	B4	B4	B3	B2	B3
chr1	48720000	48760000	B4	B4	B3	B4	B4
chr1	48760000	48800000	B4	B4	B3	B4	B4
chr1	48800000	48840000	B4	B4	B3	B4	B4
chr1	48840000	48880000	B4	B4	B3	B4	B4
chr1	48880000	48920000	B4	B4	B3	B4	B4
chr1	48920000	48960000	B4	B4	B3	B4	B4
chr1	48960000	49000000	B4	B4	B3	B4	B4
chr1	49000000	49040000	B4	B4	B4	B4	B4	Common_B4
chr1	49040000	49080000	B4	B4	B4	B4	B4	Common_B4
chr1	49080000	49120000	B4	B4	B4	B4	B4	Common_B4
chr1	49120000	49160000	B4	B4	B4	B4	B4	Common_B4
chr1	49160000	49200000	B4	B4	B4	B4	B4	Common_B4
chr1	49200000	49240000	B4	B4	B4	B4	B4	Common_B4
chr1	49240000	49280000	B4	B4	B4	B4	B4	Common_B4
chr1	49280000	49320000	B4	B4	B4	B4	B4	Common_B4
chr1	49320000	49360000	B4	B4	B4	B3	B4
chr1	49360000	49400000	B4	B4	B4	B3	B4
chr1	49400000	49440000	B4	B4	B4	B3	B4
chr1	49440000	49480000	B4	B4	B4	B4	B4	Common_B4
chr1	49480000	49520000	B4	B4	B4	B4	B4	Common_B4
chr1	49520000	49560000	B4	B4	B4	B4	B4	Common_B4
chr1	49560000	49600000	B4	B4	B4	B4	B4	Common_B4
chr1	49600000	49640000	B4	B4	B4	B4	B4	Common_B4
chr1	49640000	49680000	B4	B4	B4	B4	B4	Common_B4
chr1	49680000	49720000	B4	B4	B4	B4	B4	Common_B4
chr1	49720000	49760000	B4	B4	B4	B4	B4	Common_B4
chr1	49760000	49800000	B4	B4	B4	B4	B4	Common_B4
chr1	49800000	49840000	B4	B4	B4	B4	B4	Common_B4
chr1	49840000	49880000	B4	B4	B4	B4	B4	Common_B4
chr1	49880000	49920000	B4	B4	B4	B4	B4	Common_B4
chr1	49920000	49960000	B4	B4	B4	B4	B4	Common_B4
chr1	49960000	50000000	B4	B4	B4	B4	B4	Common_B4
chr1	50000000	50040000	B4	B4	B4	B4	B4	Common_B4
chr1	50040000	50080000	B4	B4	B4	B4	B4	Common_B4
chr1	50080000	50120000	B4	B4	B4	B4	B4	Common_B4
chr1	50120000	50160000	B4	B4	B4	B4	B4	Common_B4
chr1	50160000	50200000	B4	B4	B4	B4	B4	Common_B4
chr1	50200000	50240000	B4	B4	B4	B4	B4	Common_B4
chr1	50240000	50280000	B4	B4	B4	B4	B4	Common_B4
chr1	50280000	50320000	B4	B4	B4	B4	B4	Common_B4
chr1	50320000	50360000	B4	B4	B4	B4	B4	Common_B4
chr1	50360000	50400000	B4	B4	B4	B4	B4	Common_B4
chr1	50400000	50440000	B4	B4	B4	B4	B4	Common_B4
chr1	50440000	50480000	B4	B4	B4	B4	B4	Common_B4
chr1	50480000	50520000	B4	B4	B4	B4	B4	Common_B4
chr1	50520000	50560000	B4	B4	B4	B4	B4	Common_B4
chr1	50560000	50600000	B4	B4	B4	B4	B4	Common_B4
chr1	50600000	50640000	B4	B4	B4	B4	B3
chr1	50640000	50680000	B4	B4	B4	B4	B3
chr1	50680000	50720000	B4	B4	B4	B4	B3
chr1	50720000	50760000	B4	B4	B4	B4	B3
chr1	50760000	50800000	B4	B4	B4	B4	B3
chr1	50800000	50840000	B2	B2	B4	B4	B3
chr1	50840000	50880000	B2	B2	B2	A4	B1
chr1	50880000	50920000	B2	B2	B2	A4	B1
chr1	50920000	50960000	A3	B2	B2	A4	B1
chr1	50960000	51000000	A3	B2	B2	A4	B1
chr1	51000000	51040000	A3	B2	B2	A4	B1
chr1	51040000	51080000	A3	B2	B2	A4	B1
chr1	51080000	51120000	A3	B2	A4	A4	A3
chr1	51120000	51160000	A3	B2	A4	A4	A3
chr1	51160000	51200000	A2	A4	A4	A1	A3
chr1	51200000	51240000	A2	A4	A4	A1	A3
chr1	51240000	51280000	A2	A4	A4	A1	A3
chr1	51280000	51320000	A2	A4	A4	A1	A3
chr1	51320000	51360000	A2	A4	A4	A1	A3
chr1	51360000	51400000	A2	A3	A4	A1	A2
chr1	51400000	51440000	A2	A3	A4	A1	A2
chr1	51440000	51480000	A2	A3	A4	A1	A2
chr1	51480000	51520000	A4	A4	A4	A1	A2
chr1	51520000	51560000	A4	A4	A4	A1	A3
chr1	51560000	51600000	A4	A4	A4	A1	A3
chr1	51600000	51640000	A4	A4	A4	A1	A3
chr1	51640000	51680000	A4	A4	A4	A1	A3
chr1	51680000	51720000	A1	A1	A1	A1	A1	Common_A1
chr1	51720000	51760000	A1	A1	A1	A1	A1	Common_A1
chr1	51760000	51800000	A1	A1	A1	A1	A1	Common_A1
chr1	51800000	51840000	A1	A1	A1	A1	A1	Common_A1
chr1	51840000	51880000	A1	A1	A1	A1	A1	Common_A1
chr1	51880000	51920000	A1	A1	A1	A1	A1	Common_A1
chr1	51920000	51960000	A1	A1	A1	A1	A1	Common_A1
chr1	51960000	52000000	A1	A1	A1	A1	A1	Common_A1
chr1	52000000	52040000	A1	A1	A1	A1	A1	Common_A1
chr1	52040000	52080000	A1	A1	A1	A1	A1	Common_A1
chr1	52080000	52120000	A1	A1	A1	A1	A1	Common_A1
chr1	52120000	52160000	A1	A1	A1	A1	A1	Common_A1
chr1	52160000	52200000	A1	A1	A1	A1	A1	Common_A1
chr1	52200000	52240000	A1	A1	A1	A1	A1	Common_A1
chr1	52240000	52280000	A1	A1	A1	A1	A1	Common_A1
chr1	52280000	52320000	A1	A1	A1	A1	A1	Common_A1
chr1	52320000	52360000	A1	A1	A1	A1	A1	Common_A1
chr1	52360000	52400000	A2	A1	A1	A1	A1
chr1	52400000	52440000	A2	A1	A1	A1	A1
chr1	52440000	52480000	A2	A1	A1	A1	A1
chr1	52480000	52520000	A1	A1	A1	A1	A1	Common_A1
chr1	52520000	52560000	A1	A1	A1	A1	A1	Common_A1
chr1	52560000	52600000	A1	A1	A1	A1	A1	Common_A1
chr1	52600000	52640000	A3	A1	A1	A1	A1
chr1	52640000	52680000	A3	A1	A1	A1	A1
chr1	52680000	52720000	A3	A1	A1	A1	A1
chr1	52720000	52760000	A3	A1	A1	A1	A1
chr1	52760000	52800000	A3	A1	A1	A1	A1
chr1	52800000	52840000	A1	A1	A1	A1	A1	Common_A1
chr1	52840000	52880000	A1	A1	A1	A1	A1	Common_A1
chr1	52880000	52920000	A1	A1	A1	A1	A1	Common_A1
chr1	52920000	52960000	A1	A1	A1	A1	A1	Common_A1
chr1	52960000	53000000	A1	A1	A1	A1	A1	Common_A1
chr1	53000000	53040000	A1	A1	A1	A1	A1	Common_A1
chr1	53040000	53080000	A1	A1	A1	A1	A1	Common_A1
chr1	53080000	53120000	A1	A1	A1	A1	A1	Common_A1
chr1	53120000	53160000	A1	A1	A1	A1	A1	Common_A1
chr1	53160000	53200000	A1	A1	A1	A1	A1	Common_A1
chr1	53200000	53240000	A1	A1	A1	A1	A1	Common_A1
chr1	53240000	53280000	A1	A1	A1	A1	A1	Common_A1
chr1	53280000	53320000	A1	A1	A1	A1	A1	Common_A1
chr1	53320000	53360000	A1	A1	A1	A1	A1	Common_A1
chr1	53360000	53400000	A1	A1	A1	A2	A1
chr1	53400000	53440000	A3	A1	A1	A2	A1
chr1	53440000	53480000	A3	A1	A2	A2	A1
chr1	53480000	53520000	A3	A1	A2	A2	A1
chr1	53520000	53560000	B1	A2	A2	A2	A1
chr1	53560000	53600000	B1	A2	A2	A2	A1
chr1	53600000	53640000	B1	A2	A2	A2	A1
chr1	53640000	53680000	A2	A2	A2	A2	A1
chr1	53680000	53720000	A2	A1	A2	A2	A1
chr1	53720000	53760000	A2	A1	A2	A2	A2
chr1	53760000	53800000	A2	A1	A2	A2	A2
chr1	53800000	53840000	A2	A1	A2	A2	A2
chr1	53840000	53880000	A2	A1	A2	A2	A2
chr1	53880000	53920000	B2	A1	A2	A2	A3
chr1	53920000	53960000	B2	A2	A2	A2	A3
chr1	53960000	54000000	B2	A2	A2	A2	A3
chr1	54000000	54040000	B2	A2	A2	A2	A3
chr1	54040000	54080000	B2	A2	A2	A2	A3
chr1	54080000	54120000	B2	A2	A2	A2	A3
chr1	54120000	54160000	B2	A2	A2	A2	A3
chr1	54160000	54200000	B2	A2	A2	A2	A3
chr1	54200000	54240000	A1	A2	A2	A2	A3
chr1	54240000	54280000	A1	A2	A2	A2	A1
chr1	54280000	54320000	A1	A1	A2	A1	A1
chr1	54320000	54360000	A1	A1	A2	A1	A1
chr1	54360000	54400000	A1	A1	A2	A1	A1
chr1	54400000	54440000	A1	A1	A2	A1	A1
chr1	54440000	54480000	A2	A1	A2	A1	A1
chr1	54480000	54520000	A2	A1	A2	A1	A1
chr1	54520000	54560000	A3	A2	A1	A1	A1
chr1	54560000	54600000	A3	A2	A1	A1	A1
chr1	54600000	54640000	A3	A2	A1	A1	A1
chr1	54640000	54680000	A3	A2	A1	A1	A1
chr1	54680000	54720000	A3	A2	A1	A1	A1
chr1	54720000	54760000	A3	A1	A1	A1	A1
chr1	54760000	54800000	A3	A1	A1	A1	A1
chr1	54800000	54840000	A2	A1	A1	A1	A1
chr1	54840000	54880000	A2	A1	A1	A1	A1
chr1	54880000	54920000	A2	A1	A1	A1	A1
chr1	54920000	54960000	A2	A1	A1	A1	A1
chr1	54960000	55000000	A4	A1	A1	A1	A2
chr1	55000000	55040000	A4	A1	A2	A2	A2
chr1	55040000	55080000	A4	A2	A2	A2	A2
chr1	55080000	55120000	A4	A2	A2	A2	A2
chr1	55120000	55160000	A4	A2	A2	A1	A2
chr1	55160000	55200000	A2	A2	A2	A1	A2
chr1	55200000	55240000	A2	A2	A2	A1	A2
chr1	55240000	55280000	A2	A2	A2	A1	A2
chr1	55280000	55320000	A2	A2	A2	A1	A2
chr1	55320000	55360000	A2	A2	A2	A2	A2
chr1	55360000	55400000	A3	A3	A3	A2	A2
chr1	55400000	55440000	A3	A3	A3	A2	A2
chr1	55440000	55480000	A3	A3	A3	A2	A2
chr1	55480000	55520000	A3	A3	A3	A2	A2
chr1	55520000	55560000	A3	B3	A3	A2	A2
chr1	55560000	55600000	A2	B3	A3	A2	A2
chr1	55600000	55640000	A2	B3	A3	A2	A2
chr1	55640000	55680000	A2	B3	A3	A2	A2
chr1	55680000	55720000	A2	B3	A3	A2	A2
chr1	55720000	55760000	A2	B3	B3	A2	A2
chr1	55760000	55800000	B4	B3	B3	A2	B2
chr1	55800000	55840000	B4	B3	B3	A2	B2
chr1	55840000	55880000	B4	B3	B3	A2	B2
chr1	55880000	55920000	B4	B3	B3	A2	B2
chr1	55920000	55960000	B4	B3	B3	A2	B2
chr1	55960000	56000000	B4	B3	B3	A2	B2
chr1	56000000	56040000	B4	B3	B3	A2	B2
chr1	56040000	56080000	B4	B3	B3	A2	B4
chr1	56080000	56120000	B4	B3	B3	A2	B4
chr1	56120000	56160000	B4	B3	B3	A2	B4
chr1	56160000	56200000	B4	B3	B3	A2	B4
chr1	56200000	56240000	B4	B3	B3	A2	B4
chr1	56240000	56280000	B4	B3	B3	A2	B4
chr1	56280000	56320000	B4	B4	B3	A2	B4
chr1	56320000	56360000	B4	B4	B3	A3	B4
chr1	56360000	56400000	B4	B4	B3	A3	B4
chr1	56400000	56440000	B4	B4	B3	A3	B4
chr1	56440000	56480000	B4	B4	B3	A3	B4
chr1	56480000	56520000	A4	B4	B3	A3	B4
chr1	56520000	56560000	A4	B4	B3	A3	B4
chr1	56560000	56600000	A4	B4	B3	A3	B4
chr1	56600000	56640000	A4	B4	B3	A3	B4
chr1	56640000	56680000	B2	B4	B3	A4	B4
chr1	56680000	56720000	B2	B4	B2	A4	B4
chr1	56720000	56760000	B2	B4	B2	A4	B4
chr1	56760000	56800000	B2	B4	B2	A4	B4
chr1	56800000	56840000	B2	B4	B1	A4	B4
chr1	56840000	56880000	B2	B2	B1	A4	B2
chr1	56880000	56920000	B2	B2	B1	A3	B2
chr1	56920000	56960000	A4	B2	B1	A3	B2
chr1	56960000	57000000	A4	B2	B1	A3	B2
chr1	57000000	57040000	A4	B2	A4	A3	B2
chr1	57040000	57080000	B4	B2	A4	A3	B4
chr1	57080000	57120000	B4	B2	A4	A3	B4
chr1	57120000	57160000	B4	B2	A4	A3	B4
chr1	57160000	57200000	B4	B2	A4	A3	B4
chr1	57200000	57240000	B4	B2	A4	A3	B4
chr1	57240000	57280000	B4	B2	A4	A3	B4
chr1	57280000	57320000	B4	B4	B3	B3	B3
chr1	57320000	57360000	B4	B4	B3	B3	B3
chr1	57360000	57400000	B4	B4	B3	B3	B3
chr1	57400000	57440000	B4	B4	B3	B3	B3
chr1	57440000	57480000	B4	B4	B3	B3	B3
chr1	57480000	57520000	B4	B4	B3	B3	B3
chr1	57520000	57560000	B4	B4	B3	B3	B3
chr1	57560000	57600000	B3	B4	B3	B3	B3
chr1	57600000	57640000	B3	B4	B3	B3	B1
chr1	57640000	57680000	B3	B4	B3	B3	B1
chr1	57680000	57720000	B4	B4	B3	B3	B1
chr1	57720000	57760000	B4	B4	B3	B3	B1
chr1	57760000	57800000	B4	B4	B3	B3	B1
chr1	57800000	57840000	B4	B4	B3	B3	B4
chr1	57840000	57880000	B4	B4	B3	B3	B4
chr1	57880000	57920000	B4	B4	B3	B3	B4
chr1	57920000	57960000	B4	B4	B3	B3	B4
chr1	57960000	58000000	B4	B4	B3	B3	B4
chr1	58000000	58040000	B4	B4	B3	B3	B4
chr1	58040000	58080000	B4	B4	B3	B3	B4
chr1	58080000	58120000	B4	B4	B3	B3	B4
chr1	58120000	58160000	B4	B4	B3	B3	B4
chr1	58160000	58200000	B4	B4	B3	B4	B4
chr1	58200000	58240000	B4	B4	B3	B4	B4
chr1	58240000	58280000	B4	B4	B3	B4	B4
chr1	58280000	58320000	B4	B4	B3	B4	B4
chr1	58320000	58360000	B4	B4	B3	B4	B4
chr1	58360000	58400000	B4	B4	B3	B4	B3
chr1	58400000	58440000	B4	B4	B3	B4	B3
chr1	58440000	58480000	B4	B4	B3	B4	B3
chr1	58480000	58520000	B4	B4	B3	B4	B3
chr1	58520000	58560000	B2	B4	B3	B4	B3
chr1	58560000	58600000	B2	B4	B3	B4	B3
chr1	58600000	58640000	B2	B4	B3	B4	B3
chr1	58640000	58680000	B4	B4	B3	B4	B3
chr1	58680000	58720000	B4	B4	B3	B4	B3
chr1	58720000	58760000	B4	B4	B3	B4	B3
chr1	58760000	58800000	B4	B4	B3	B4	B3
chr1	58800000	58840000	B4	B4	B3	B4	B3
chr1	58840000	58880000	B4	B4	B3	B4	B3
chr1	58880000	58920000	B4	B4	B3	B4	B3
chr1	58920000	58960000	B4	B2	B1	B4	A3
chr1	58960000	59000000	A2	B2	B1	A4	A3
chr1	59000000	59040000	A2	B2	B1	A4	A3
chr1	59040000	59080000	A2	B2	B1	A4	A3
chr1	59080000	59120000	A2	B2	B1	A4	A3
chr1	59120000	59160000	A2	B2	B1	A4	A3
chr1	59160000	59200000	A2	B2	A3	A3	A3
chr1	59200000	59240000	A2	B2	A3	A3	A3
chr1	59240000	59280000	A2	B2	A3	A3	A2
chr1	59280000	59320000	A2	B2	A3	A3	A2
chr1	59320000	59360000	A2	B2	A3	A3	A2
chr1	59360000	59400000	A2	B2	A4	A3	A2
chr1	59400000	59440000	A2	B2	A4	A4	A2
chr1	59440000	59480000	A2	B2	A4	A4	A2
chr1	59480000	59520000	A2	B2	A4	A4	A2
chr1	59520000	59560000	A3	B2	A4	A4	A2
chr1	59560000	59600000	A3	B2	A4	A4	A4
chr1	59600000	59640000	A3	B2	A4	A4	A4
chr1	59640000	59680000	A3	B2	A4	B2	A4
chr1	59680000	59720000	A3	B2	A4	B2	A4
chr1	59720000	59760000	A2	B2	B1	B2	A4
chr1	59760000	59800000	A2	B2	B1	B2	A4
chr1	59800000	59840000	A2	B2	B1	B1	A4
chr1	59840000	59880000	A2	B2	B1	B1	A4
chr1	59880000	59920000	A2	B2	B1	B1	A4
chr1	59920000	59960000	A3	B2	B1	B1	A4
chr1	59960000	60000000	A3	B2	B1	B1	B1
chr1	60000000	60040000	A3	B2	B1	B2	B1
chr1	60040000	60080000	A3	B2	B1	B2	B1
chr1	60080000	60120000	A3	B2	B1	B2	B1
chr1	60120000	60160000	A3	B2	B1	B2	B1
chr1	60160000	60200000	A3	B2	B1	B2	B1
chr1	60200000	60240000	A3	B2	B1	B2	B1
chr1	60240000	60280000	A3	B2	B1	B2	B3
chr1	60280000	60320000	A3	B2	B3	B2	B3
chr1	60320000	60360000	B4	B2	B3	B2	B3
chr1	60360000	60400000	B4	B2	B3	B2	B3
chr1	60400000	60440000	B4	B4	B3	B2	B3
chr1	60440000	60480000	B4	B4	B3	B4	B3
chr1	60480000	60520000	B4	B4	B3	B4	B4
chr1	60520000	60560000	B4	B4	B3	B4	B4
chr1	60560000	60600000	B4	B4	B3	B4	B4
chr1	60600000	60640000	B4	B4	B3	B4	B4
chr1	60640000	60680000	B4	B4	B4	B4	B4	Common_B4
chr1	60680000	60720000	B4	B4	B4	B4	B4	Common_B4
chr1	60720000	60760000	B4	B4	B4	B4	B4	Common_B4
chr1	60760000	60800000	B4	B4	B4	B4	B4	Common_B4
chr1	60800000	60840000	B4	B4	B3	B4	B4
chr1	60840000	60880000	B4	B4	B3	B4	B4
chr1	60880000	60920000	B4	B4	B3	B4	B4
chr1	60920000	60960000	B4	B4	B3	B4	B4
chr1	60960000	61000000	B4	B4	B3	B4	B4
chr1	61000000	61040000	B4	B4	B3	B4	B4
chr1	61040000	61080000	B4	B4	B3	B4	B4
chr1	61080000	61120000	B4	B4	B4	B4	B4	Common_B4
chr1	61120000	61160000	B4	B4	B4	B4	B4	Common_B4
chr1	61160000	61200000	B4	B4	B4	B4	B4	Common_B4
chr1	61200000	61240000	B4	B4	B4	B4	B4	Common_B4
chr1	61240000	61280000	B4	B4	B4	B4	B4	Common_B4
chr1	61280000	61320000	B4	B2	B2	B2	B4
chr1	61320000	61360000	B4	B2	B2	B2	A4
chr1	61360000	61400000	B4	B2	B1	B2	A4
chr1	61400000	61440000	B4	B2	B1	B2	A4
chr1	61440000	61480000	B4	B1	A4	B2	A2
chr1	61480000	61520000	B4	B1	A4	B2	A2
chr1	61520000	61560000	B4	A3	A4	A3	A2
chr1	61560000	61600000	B4	A3	A4	A3	A2
chr1	61600000	61640000	B4	A3	A4	A3	A2
chr1	61640000	61680000	B4	A3	A4	A3	A2
chr1	61680000	61720000	B4	A3	A4	A3	A2
chr1	61720000	61760000	B2	A3	A4	A3	A2
chr1	61760000	61800000	B2	A3	A4	A3	A2
chr1	61800000	61840000	B2	A3	A4	A4	A2
chr1	61840000	61880000	B4	A3	A4	A4	A2
chr1	61880000	61920000	B4	B1	A4	A4	A2
chr1	61920000	61960000	B4	B1	A4	A4	B1
chr1	61960000	62000000	B4	B1	A4	A4	B1
chr1	62000000	62040000	B4	B1	A4	A4	B1
chr1	62040000	62080000	B4	B1	A4	A4	B1
chr1	62080000	62120000	B4	B1	A4	A4	B1
chr1	62120000	62160000	A3	A4	A3	A3	A4
chr1	62160000	62200000	A3	A4	A3	A3	A4
chr1	62200000	62240000	A3	A4	A3	A3	A4
chr1	62240000	62280000	A3	A4	A3	A3	A4
chr1	62280000	62320000	B2	A4	B1	A3	B2
chr1	62320000	62360000	B2	A4	B1	A3	B2
chr1	62360000	62400000	B2	A3	A4	A3	B2
chr1	62400000	62440000	B2	A3	A4	A3	B2
chr1	62440000	62480000	B2	A3	A4	A3	B2
chr1	62480000	62520000	B2	A3	A4	A3	B2
chr1	62520000	62560000	B2	A3	A4	A3	B2
chr1	62560000	62600000	B2	A3	A4	A3	B2
chr1	62600000	62640000	B2	A2	A3	A1	B1
chr1	62640000	62680000	B3	A2	A3	A1	B1
chr1	62680000	62720000	B3	A2	A3	A1	B1
chr1	62720000	62760000	B3	A2	A3	A1	B1
chr1	62760000	62800000	B3	A2	A3	A1	B1
chr1	62800000	62840000	B3	A2	A3	A1	B1
chr1	62840000	62880000	B3	A2	A3	A1	B1
chr1	62880000	62920000	A2	A2	A3	A1	A2
chr1	62920000	62960000	A2	A2	A2	A2	A2
chr1	62960000	63000000	A2	A2	A2	A2	A2
chr1	63000000	63040000	A2	A2	A2	A2	A2
chr1	63040000	63080000	A1	A2	A2	A2	A2
chr1	63080000	63120000	A1	A2	A2	A2	A2
chr1	63120000	63160000	A1	A2	A2	A2	A2
chr1	63160000	63200000	A1	A2	A2	A2	A2
chr1	63200000	63240000	A1	A2	A2	A2	A2
chr1	63240000	63280000	A1	A2	A3	A2	A2
chr1	63280000	63320000	A1	A1	A3	B1	B1
chr1	63320000	63360000	B3	A1	A3	B1	B1
chr1	63360000	63400000	B3	A1	A3	B1	B1
chr1	63400000	63440000	B3	A1	A3	B1	B1
chr1	63440000	63480000	B3	A1	A3	B1	B1
chr1	63480000	63520000	B3	A1	A3	B1	B1
chr1	63520000	63560000	B3	A1	A4	B1	B1
chr1	63560000	63600000	B3	A1	A4	B1	B1
chr1	63600000	63640000	B3	A1	A4	B1	B1
chr1	63640000	63680000	B3	A1	A4	B1	B1
chr1	63680000	63720000	B3	A2	A4	B1	B1
chr1	63720000	63760000	B3	A2	A4	B1	B1
chr1	63760000	63800000	B3	A2	A4	B1	A3
chr1	63800000	63840000	A2	A2	A3	A3	A3
chr1	63840000	63880000	A2	A2	A3	A3	A3
chr1	63880000	63920000	A2	A2	A3	A3	A3
chr1	63920000	63960000	A2	A2	A3	A3	A3
chr1	63960000	64000000	A2	A2	A3	A3	A3
chr1	64000000	64040000	A2	A2	A3	A3	B1
chr1	64040000	64080000	A2	B2	A4	A3	B1
chr1	64080000	64120000	B3	B2	A4	A3	B1
chr1	64120000	64160000	B3	B2	A4	A3	B1
chr1	64160000	64200000	B3	B2	A4	A3	B1
chr1	64200000	64240000	B3	B2	A4	A3	B3
chr1	64240000	64280000	B3	B2	A4	A3	B3
chr1	64280000	64320000	B3	B2	A4	A3	B3
chr1	64320000	64360000	B3	B2	A4	A3	B3
chr1	64360000	64400000	B3	B2	A4	A3	B3
chr1	64400000	64440000	B4	B2	A4	A3	B3
chr1	64440000	64480000	B4	B2	A4	A3	B3
chr1	64480000	64520000	B4	B2	A4	A3	B3
chr1	64520000	64560000	B4	B2	A4	A3	B3
chr1	64560000	64600000	B4	B2	A4	A3	B3
chr1	64600000	64640000	B1	B2	A4	A3	B3
chr1	64640000	64680000	B1	B2	A4	A3	B3
chr1	64680000	64720000	B1	B2	A4	A3	B2
chr1	64720000	64760000	B4	A3	A3	B1	B2
chr1	64760000	64800000	B4	A3	A3	B1	B2
chr1	64800000	64840000	B4	A3	A3	B1	B2
chr1	64840000	64880000	B4	A3	A3	B1	B2
chr1	64880000	64920000	B4	A3	A3	B1	B2
chr1	64920000	64960000	B4	A3	A3	B1	B2
chr1	64960000	65000000	B4	A3	A3	B1	B2
chr1	65000000	65040000	B4	A3	A3	B1	B2
chr1	65040000	65080000	B4	A3	A3	B1	B2
chr1	65080000	65120000	B4	A3	A3	B1	B2
chr1	65120000	65160000	B3	A3	A3	A4	A4
chr1	65160000	65200000	B3	A3	A3	A4	A4
chr1	65200000	65240000	B3	A3	A3	A4	A4
chr1	65240000	65280000	B3	A3	A3	A4	A4
chr1	65280000	65320000	B3	A3	A3	A4	A4
chr1	65320000	65360000	A3	B1	A2	A2	A2
chr1	65360000	65400000	A3	B1	A2	A2	A2
chr1	65400000	65440000	A3	B1	A2	A2	A2
chr1	65440000	65480000	A3	B1	A2	A2	A2
chr1	65480000	65520000	B1	A4	A3	A3	A2
chr1	65520000	65560000	B1	A4	A3	A3	A2
chr1	65560000	65600000	B1	A4	A3	A3	A2
chr1	65600000	65640000	A2	A4	A3	A3	A2
chr1	65640000	65680000	A2	A4	A3	A3	A2
chr1	65680000	65720000	A2	B3	B2	A3	A2
chr1	65720000	65760000	B2	B3	B2	A3	A2
chr1	65760000	65800000	B2	B3	B2	A3	A2
chr1	65800000	65840000	B2	B3	B2	A3	A2
chr1	65840000	65880000	B2	B3	B2	A3	A2
chr1	65880000	65920000	B2	B3	B2	A4	A2
chr1	65920000	65960000	B2	B3	B2	A4	A2
chr1	65960000	66000000	B4	B3	B2	A4	A2
chr1	66000000	66040000	B4	B3	B2	A4	A2
chr1	66040000	66080000	B4	B3	B2	A4	A2
chr1	66080000	66120000	B4	B3	B2	A4	A2
chr1	66120000	66160000	B4	B3	B2	A4	A2
chr1	66160000	66200000	B4	B3	B2	B1	B2
chr1	66200000	66240000	B4	B4	B3	B1	B2
chr1	66240000	66280000	B3	B4	B3	B1	B2
chr1	66280000	66320000	B3	B4	B3	B1	B2
chr1	66320000	66360000	B3	B4	B3	B1	B2
chr1	66360000	66400000	B3	B4	B3	B1	B2
chr1	66400000	66440000	B3	B4	B3	A3	B2
chr1	66440000	66480000	B4	B4	B3	A3	B3
chr1	66480000	66520000	B4	B4	B3	A3	B3
chr1	66520000	66560000	B4	B4	B3	A3	B3
chr1	66560000	66600000	B4	B4	B3	A3	B3
chr1	66600000	66640000	B4	B4	B3	A3	B3
chr1	66640000	66680000	B4	B4	B3	A3	B3
chr1	66680000	66720000	B4	B4	B3	A2	B3
chr1	66720000	66760000	A1	B2	B3	A2	B3
chr1	66760000	66800000	A1	B2	B3	A2	B3
chr1	66800000	66840000	A1	B2	B3	A2	B3
chr1	66840000	66880000	A1	B2	B3	A2	B3
chr1	66880000	66920000	A1	B2	B3	A2	B3
chr1	66920000	66960000	B3	B2	B3	A2	B3
chr1	66960000	67000000	B3	B2	B3	A2	B3
chr1	67000000	67040000	B3	B3	B3	A4	B2
chr1	67040000	67080000	B3	B3	B3	A4	B2
chr1	67080000	67120000	B3	B3	B3	A4	B2
chr1	67120000	67160000	B2	B3	B3	A4	B2
chr1	67160000	67200000	B2	B3	B3	A4	B2
chr1	67200000	67240000	B2	B2	B3	A2	A3
chr1	67240000	67280000	B2	B2	B3	A2	A3
chr1	67280000	67320000	B2	B2	A4	A2	A3
chr1	67320000	67360000	B2	B2	A4	A2	A3
chr1	67360000	67400000	A2	B2	A4	A2	A2
chr1	67400000	67440000	A2	A4	A4	A2	A2
chr1	67440000	67480000	A2	A4	A4	A3	A2
chr1	67480000	67520000	A2	A4	A4	A3	A2
chr1	67520000	67560000	A2	A4	A4	A3	A2
chr1	67560000	67600000	A2	A4	A4	A3	A2
chr1	67600000	67640000	A2	A4	A4	A3	A2
chr1	67640000	67680000	A2	A4	A4	A3	A2
chr1	67680000	67720000	A2	A2	A4	A1	A3
chr1	67720000	67760000	A2	A2	A4	A1	A3
chr1	67760000	67800000	A2	A2	A4	A1	A3
chr1	67800000	67840000	A1	A2	A2	A1	A3
chr1	67840000	67880000	A1	A2	A2	A1	A2
chr1	67880000	67920000	A1	A2	A2	A1	A2
chr1	67920000	67960000	A4	A2	A2	A1	A2
chr1	67960000	68000000	A4	A3	A3	A2	A1
chr1	68000000	68040000	A4	A3	A3	A2	A1
chr1	68040000	68080000	A4	A3	A3	A2	A1
chr1	68080000	68120000	A4	A3	A3	A2	A1
chr1	68120000	68160000	A2	A3	A3	A2	A1
chr1	68160000	68200000	A2	A3	A3	A2	A1
chr1	68200000	68240000	A2	A4	A3	A2	A1
chr1	68240000	68280000	B4	A4	B2	A3	A3
chr1	68280000	68320000	B4	A4	B2	A3	A3
chr1	68320000	68360000	B4	A4	B2	A3	A3
chr1	68360000	68400000	B4	A4	B2	A3	A3
chr1	68400000	68440000	B4	A4	B2	A3	A3
chr1	68440000	68480000	B4	A4	B2	A3	A3
chr1	68480000	68520000	B4	A4	B2	A3	A3
chr1	68520000	68560000	B4	A3	B1	A3	B2
chr1	68560000	68600000	B2	A3	B1	A3	B2
chr1	68600000	68640000	B2	A3	B1	A3	B2
chr1	68640000	68680000	B2	A3	A4	A3	B2
chr1	68680000	68720000	B3	A3	A4	A3	B2
chr1	68720000	68760000	B3	A3	A4	A3	B2
chr1	68760000	68800000	B3	A3	A4	A3	B2
chr1	68800000	68840000	B3	A4	B3	A3	B2
chr1	68840000	68880000	B3	A4	B3	A3	B2
chr1	68880000	68920000	B3	A4	B3	A3	B2
chr1	68920000	68960000	B3	B1	B3	A3	B2
chr1	68960000	69000000	B3	B1	B4	B2	B2
chr1	69000000	69040000	B4	B1	B4	B2	B4
chr1	69040000	69080000	B4	B1	B4	B2	B4
chr1	69080000	69120000	B4	B1	B4	B2	B4
chr1	69120000	69160000	B4	B1	B4	B2	B4
chr1	69160000	69200000	B4	B1	B4	B2	B4
chr1	69200000	69240000	B4	B1	B4	B3	B4
chr1	69240000	69280000	B4	B1	B4	B3	B4
chr1	69280000	69320000	B4	B1	B4	B3	B4
chr1	69320000	69360000	B4	B1	B4	B3	B4
chr1	69360000	69400000	B4	B1	B4	B3	B4
chr1	69400000	69440000	B4	B1	B4	B3	B4
chr1	69440000	69480000	B4	B1	B4	B3	B3
chr1	69480000	69520000	B4	B1	B4	B3	B3
chr1	69520000	69560000	B4	B1	B4	B3	B4
chr1	69560000	69600000	B4	B1	B4	B3	B4
chr1	69600000	69640000	B4	B1	B4	B3	B4
chr1	69640000	69680000	B4	B1	B4	B3	B4
chr1	69680000	69720000	B4	B1	B4	B3	B4
chr1	69720000	69760000	B4	B1	B4	B3	B4
chr1	69760000	69800000	B4	B1	B4	B3	B4
chr1	69800000	69840000	B4	B1	B4	B3	B4
chr1	69840000	69880000	B4	B1	B4	B3	B4
chr1	69880000	69920000	B4	B1	B4	B3	B2
chr1	69920000	69960000	B4	B1	B4	B2	B2
chr1	69960000	70000000	B4	B1	B4	B2	B2
chr1	70000000	70040000	B4	B1	B4	B2	B2
chr1	70040000	70080000	B4	B1	B4	B2	B2
chr1	70080000	70120000	B4	B1	B4	B2	B3
chr1	70120000	70160000	B4	B1	B4	B2	B3
chr1	70160000	70200000	B4	B1	B4	B2	B3
chr1	70200000	70240000	B4	B1	B4	B2	B3
chr1	70240000	70280000	B4	B1	B4	A4	B3
chr1	70280000	70320000	B4	B1	B4	A4	B3
chr1	70320000	70360000	B4	B1	B4	A4	B3
chr1	70360000	70400000	B4	B1	B4	A4	B3
chr1	70400000	70440000	B4	B1	B4	A4	B3
chr1	70440000	70480000	B4	B1	B4	A4	B3
chr1	70480000	70520000	B4	B1	B4	A4	A4
chr1	70520000	70560000	B4	B1	B4	A4	A4
chr1	70560000	70600000	B4	B1	B4	A4	A4
chr1	70600000	70640000	A1	B1	B4	A4	A4
chr1	70640000	70680000	A1	A2	A4	A4	A2
chr1	70680000	70720000	A1	A2	A4	A4	A2
chr1	70720000	70760000	A1	A2	A4	A2	A2
chr1	70760000	70800000	A1	A2	A4	A2	A2
chr1	70800000	70840000	A1	A2	A4	A2	A2
chr1	70840000	70880000	A1	A2	A4	A2	A2
chr1	70880000	70920000	A1	A2	A4	A2	A2
chr1	70920000	70960000	B4	A2	A4	A2	A3
chr1	70960000	71000000	B4	A2	B3	A2	A3
chr1	71000000	71040000	B4	A4	B3	B4	A3
chr1	71040000	71080000	B4	A4	B3	B4	A3
chr1	71080000	71120000	B4	A4	B3	B4	A3
chr1	71120000	71160000	B4	A4	B3	B4	A3
chr1	71160000	71200000	B4	A4	B3	B4	A3
chr1	71200000	71240000	B4	A4	B3	B4	A3
chr1	71240000	71280000	B4	A4	B3	B4	A4
chr1	71280000	71320000	B4	A4	B3	B4	A4
chr1	71320000	71360000	B4	A4	B3	B4	A4
chr1	71360000	71400000	B4	A4	B3	B4	A4
chr1	71400000	71440000	B4	A4	B3	B4	A4
chr1	71440000	71480000	B4	A4	B3	B4	A4
chr1	71480000	71520000	B1	A4	B3	B4	A4
chr1	71520000	71560000	B1	A4	B3	B4	A4
chr1	71560000	71600000	B1	B3	B4	B3	B4
chr1	71600000	71640000	B4	B3	B4	B3	B4
chr1	71640000	71680000	B4	B3	B4	B3	B4
chr1	71680000	71720000	B4	B3	B4	B3	B4
chr1	71720000	71760000	B4	B3	B4	B3	B4
chr1	71760000	71800000	B4	B3	B4	B3	B4
chr1	71800000	71840000	B4	B3	B4	B3	B4
chr1	71840000	71880000	B4	B3	B4	B3	B4
chr1	71880000	71920000	B4	B3	B4	B3	B4
chr1	71920000	71960000	B4	B3	B4	B3	B4
chr1	71960000	72000000	B4	B3	B4	B3	B4
chr1	72000000	72040000	B4	B3	B4	B3	B4
chr1	72040000	72080000	B4	B3	B4	B3	B4
chr1	72080000	72120000	B4	B3	B4	B3	B4
chr1	72120000	72160000	B4	B3	B4	B3	B4
chr1	72160000	72200000	B4	B3	B4	B3	B4
chr1	72200000	72240000	B4	B3	B4	B3	B4
chr1	72240000	72280000	B4	B3	B4	B3	B4
chr1	72280000	72320000	B4	B3	B4	B3	B4
chr1	72320000	72360000	B4	B3	B4	B3	B4
chr1	72360000	72400000	B4	B3	B4	B3	B4
chr1	72400000	72440000	B4	B3	B4	B3	B4
chr1	72440000	72480000	B4	B3	B4	B3	B4
chr1	72480000	72520000	B4	B3	B4	B3	B4
chr1	72520000	72560000	B3	B3	B4	B3	B4
chr1	72560000	72600000	B3	B3	B4	B3	B4
chr1	72600000	72640000	B3	B3	B4	B3	B3
chr1	72640000	72680000	B3	B3	B4	B3	B3
chr1	72680000	72720000	B3	B3	B4	B3	B3
chr1	72720000	72760000	B2	B3	B2	B1	B3
chr1	72760000	72800000	B2	B2	B2	B1	B3
chr1	72800000	72840000	B2	B2	B3	B1	B3
chr1	72840000	72880000	B3	B4	B3	B1	B3
chr1	72880000	72920000	B3	B4	B3	B2	B4
chr1	72920000	72960000	B3	B4	B3	B2	B4
chr1	72960000	73000000	B3	B4	B3	B2	B4
chr1	73000000	73040000	B4	B4	B4	B2	B4
chr1	73040000	73080000	B4	B4	B4	B2	B4
chr1	73080000	73120000	B4	B4	B4	B2	B4
chr1	73120000	73160000	B4	B4	B4	B2	B4
chr1	73160000	73200000	B4	B4	B4	B2	B4
chr1	73200000	73240000	B4	B4	B4	B2	B4
chr1	73240000	73280000	B4	B4	B4	B2	B4
chr1	73280000	73320000	B4	B4	B4	B2	B4
chr1	73320000	73360000	B4	B4	B4	B2	B4
chr1	73360000	73400000	B4	B4	B4	B2	B4
chr1	73400000	73440000	B4	B2	B4	B2	B4
chr1	73440000	73480000	B4	B2	B4	B2	B4
chr1	73480000	73520000	B4	B2	B4	B2	B4
chr1	73520000	73560000	B4	B2	B4	B2	B4
chr1	73560000	73600000	B4	B2	B4	B2	B4
chr1	73600000	73640000	B4	B2	B4	B2	B4
chr1	73640000	73680000	B4	B2	B4	B2	B4
chr1	73680000	73720000	B4	B2	B4	B3	B4
chr1	73720000	73760000	B4	B3	B4	B3	B4
chr1	73760000	73800000	B4	B3	B4	B3	B3
chr1	73800000	73840000	B4	B3	B4	B3	B3
chr1	73840000	73880000	B4	B3	B4	B3	B4
chr1	73880000	73920000	B4	B3	B4	B3	B4
chr1	73920000	73960000	B4	B3	B4	B3	B4
chr1	73960000	74000000	B4	B3	B4	B3	B4
chr1	74000000	74040000	B4	B3	B4	B3	B4
chr1	74040000	74080000	B4	B3	B4	B3	B4
chr1	74080000	74120000	B4	B3	B4	B3	B4
chr1	74120000	74160000	B4	B3	B4	B3	B4
chr1	74160000	74200000	B4	B3	B4	B3	B4
chr1	74200000	74240000	B4	B3	B4	B3	B3
chr1	74240000	74280000	B4	B4	B4	B3	B3
chr1	74280000	74320000	B4	B4	B4	B3	B3
chr1	74320000	74360000	B4	B4	B4	B3	B3
chr1	74360000	74400000	B4	B4	B4	B3	B3
chr1	74400000	74440000	B4	B4	B4	B3	B3
chr1	74440000	74480000	B4	B4	B4	B3	B3
chr1	74480000	74520000	B4	B4	B4	B3	B3
chr1	74520000	74560000	B4	B3	B4	B3	B3
chr1	74560000	74600000	B4	B3	B4	B3	B3
chr1	74600000	74640000	B3	B3	B3	B3	B3
chr1	74640000	74680000	B3	B3	B3	B3	B3
chr1	74680000	74720000	B3	B3	B3	B3	B3
chr1	74720000	74760000	B3	B3	B3	B3	B3
chr1	74760000	74800000	B3	B3	B3	B3	B3
chr1	74800000	74840000	B3	B3	B3	B3	B3
chr1	74840000	74880000	B3	B3	B3	B3	B3
chr1	74880000	74920000	B3	B2	B3	B3	B3
chr1	74920000	74960000	B3	B2	B3	B3	B3
chr1	74960000	75000000	B3	B2	B3	B3	B3
chr1	75000000	75040000	B3	B3	B3	B3	B3
chr1	75040000	75080000	B3	B3	B3	B3	B3
chr1	75080000	75120000	B3	B3	B3	B3	B3
chr1	75120000	75160000	A3	B3	B3	B3	B3
chr1	75160000	75200000	A3	B3	B3	B3	B3
chr1	75200000	75240000	A3	B3	B4	B4	B3
chr1	75240000	75280000	B4	B3	B4	B4	B4
chr1	75280000	75320000	B4	B3	B4	B4	B4
chr1	75320000	75360000	B4	B3	B4	B4	B4
chr1	75360000	75400000	B4	B3	B4	B4	B4
chr1	75400000	75440000	B4	B3	B4	B4	B4
chr1	75440000	75480000	B4	B4	B4	B4	B4	Common_B4
chr1	75480000	75520000	B4	B4	B3	B4	B4
chr1	75520000	75560000	B4	B4	B3	B4	B4
chr1	75560000	75600000	B4	B4	B3	B4	B4
chr1	75600000	75640000	B4	B4	B3	B4	B4
chr1	75640000	75680000	B3	B4	B3	B4	B4
chr1	75680000	75720000	B3	B4	B3	B4	B4
chr1	75720000	75760000	B3	B2	B3	B4	A4
chr1	75760000	75800000	B3	B2	B3	B4	A4
chr1	75800000	75840000	B3	B2	B3	B4	A4
chr1	75840000	75880000	B3	B2	B3	B4	A4
chr1	75880000	75920000	B3	B2	B3	B4	A4
chr1	75920000	75960000	B3	B2	B3	B4	A4
chr1	75960000	76000000	B3	B2	B3	B4	A4
chr1	76000000	76040000	B3	B2	B3	B4	A4
chr1	76040000	76080000	B3	B2	B3	B4	A4
chr1	76080000	76120000	B3	B2	B3	B4	A4
chr1	76120000	76160000	B3	B2	B3	B4	A2
chr1	76160000	76200000	A2	B2	B3	A4	A2
chr1	76200000	76240000	A2	B2	B3	A4	A2
chr1	76240000	76280000	A2	B2	B3	A4	A2
chr1	76280000	76320000	B1	B3	B1	B3	B3
chr1	76320000	76360000	B1	B3	B1	B3	B3
chr1	76360000	76400000	B1	B3	B1	B3	B3
chr1	76400000	76440000	B1	B3	B1	B3	B3
chr1	76440000	76480000	B1	B3	B1	B3	B3
chr1	76480000	76520000	B1	B3	B1	B3	B3
chr1	76520000	76560000	B3	B3	B1	B3	B3
chr1	76560000	76600000	B3	B4	B1	B3	B3
chr1	76600000	76640000	B3	B4	B1	B3	B4
chr1	76640000	76680000	B3	B4	B1	B3	B4
chr1	76680000	76720000	B3	B4	B1	B3	B4
chr1	76720000	76760000	B3	B4	B1	B3	B4
chr1	76760000	76800000	B3	B4	B1	B3	B4
chr1	76800000	76840000	B3	B4	B1	B4	B4
chr1	76840000	76880000	B3	B4	B3	B4	B4
chr1	76880000	76920000	B3	B4	B3	B4	B4
chr1	76920000	76960000	B3	B4	B3	B4	B4
chr1	76960000	77000000	B3	B4	B3	B4	B4
chr1	77000000	77040000	B4	B4	B3	B4	B4
chr1	77040000	77080000	B4	B4	B3	B4	B4
chr1	77080000	77120000	B4	B4	B3	B4	B4
chr1	77120000	77160000	B4	B4	B3	B4	B4
chr1	77160000	77200000	B4	B4	B3	B4	B4
chr1	77200000	77240000	B4	B4	B3	B4	B4
chr1	77240000	77280000	B4	B4	B3	B4	B4
chr1	77280000	77320000	B4	B4	B3	B4	B4
chr1	77320000	77360000	B3	B4	B3	B3	B4
chr1	77360000	77400000	B3	B4	B3	B3	B4
chr1	77400000	77440000	B3	B4	B3	B3	B4
chr1	77440000	77480000	B3	B4	B3	B3	B4
chr1	77480000	77520000	B3	B4	B3	B3	B4
chr1	77520000	77560000	B3	B4	B3	B3	B1
chr1	77560000	77600000	B1	B4	B3	B3	B1
chr1	77600000	77640000	B1	B3	B1	A4	B1
chr1	77640000	77680000	B1	B3	B1	A4	B1
chr1	77680000	77720000	B1	B3	B1	A4	B1
chr1	77720000	77760000	B2	B3	B1	A4	B1
chr1	77760000	77800000	B2	B3	B1	A4	B1
chr1	77800000	77840000	B2	B3	B1	A4	B1
chr1	77840000	77880000	B2	B3	B1	A4	B1
chr1	77880000	77920000	B2	B3	B1	A4	B1
chr1	77920000	77960000	B2	B3	B1	A4	B1
chr1	77960000	78000000	B2	B3	B1	A4	B1
chr1	78000000	78040000	B2	B3	B1	A2	B1
chr1	78040000	78080000	A1	A3	A2	A2	A2
chr1	78080000	78120000	A1	A3	A2	A2	A2
chr1	78120000	78160000	A1	A3	A2	A2	A2
chr1	78160000	78200000	A1	A3	A2	A2	A2
chr1	78200000	78240000	A1	A3	A1	A2	A2
chr1	78240000	78280000	A1	A3	A1	A2	A2
chr1	78280000	78320000	A1	A3	A1	A2	A2
chr1	78320000	78360000	A1	A3	A1	A2	A2
chr1	78360000	78400000	A1	A3	A1	A2	A2
chr1	78400000	78440000	A1	A3	A1	A2	A2
chr1	78440000	78480000	A1	A3	A3	A2	A2
chr1	78480000	78520000	B3	B4	A3	A2	A2
chr1	78520000	78560000	B3	B4	A3	A2	A2
chr1	78560000	78600000	B3	B4	A3	A2	B4
chr1	78600000	78640000	B3	B4	B3	A2	B4
chr1	78640000	78680000	B3	B4	B3	A2	B4
chr1	78680000	78720000	B3	B4	B3	A2	B4
chr1	78720000	78760000	B3	B4	B3	A2	B4
chr1	78760000	78800000	B3	B4	B3	A2	B4
chr1	78800000	78840000	B3	B4	B3	A2	B4
chr1	78840000	78880000	B3	B4	B3	A2	B4
chr1	78880000	78920000	B3	B4	B3	A2	B4
chr1	78920000	78960000	B3	B4	B3	A2	B4
chr1	78960000	79000000	B3	B4	B3	A2	B4
chr1	79000000	79040000	B3	B4	B3	A2	B4
chr1	79040000	79080000	A3	B4	B3	A2	B3
chr1	79080000	79120000	A3	B4	B3	A2	B3
chr1	79120000	79160000	A3	B4	B3	A3	B3
chr1	79160000	79200000	B3	B4	B3	A3	B3
chr1	79200000	79240000	B3	B4	B3	A3	B3
chr1	79240000	79280000	B3	B4	B3	A3	B3
chr1	79280000	79320000	B3	B4	B3	A3	B3
chr1	79320000	79360000	B3	B4	B3	A3	B3
chr1	79360000	79400000	B3	B4	B3	A3	B3
chr1	79400000	79440000	B3	B4	B3	A3	B4
chr1	79440000	79480000	B3	B4	B3	A3	B4
chr1	79480000	79520000	B3	B4	B3	A3	B4
chr1	79520000	79560000	B3	B4	B3	A3	B4
chr1	79560000	79600000	B3	B4	B3	A3	B4
chr1	79600000	79640000	B3	B4	B3	A3	B4
chr1	79640000	79680000	B3	B4	B3	A3	B4
chr1	79680000	79720000	B3	B3	B3	B1	B4
chr1	79720000	79760000	B3	B3	B3	B1	B4
chr1	79760000	79800000	B3	B3	B3	B1	B4
chr1	79800000	79840000	B3	B3	B3	B1	B4
chr1	79840000	79880000	B3	B3	B3	B1	B4
chr1	79880000	79920000	B2	B4	B3	B1	B4
chr1	79920000	79960000	B2	B4	B2	B1	B3
chr1	79960000	80000000	B2	B4	B2	B1	B3
chr1	80000000	80040000	B2	B4	B2	B1	B3
chr1	80040000	80080000	B2	B4	B2	B1	B4
chr1	80080000	80120000	B1	B3	B2	B1	B4
chr1	80120000	80160000	B1	B3	B2	B1	B4
chr1	80160000	80200000	B1	B3	B2	B1	B4
chr1	80200000	80240000	B1	B3	B2	B1	B4
chr1	80240000	80280000	B1	B3	B2	B1	B4
chr1	80280000	80320000	B4	B3	B3	B2	B4
chr1	80320000	80360000	B4	B3	B3	B2	B4
chr1	80360000	80400000	B4	B3	B3	B2	B4
chr1	80400000	80440000	B4	B3	B3	B2	B4
chr1	80440000	80480000	B4	B3	B3	B2	B4
chr1	80480000	80520000	B4	B3	B3	B2	B4
chr1	80520000	80560000	B4	B3	B3	B2	B4
chr1	80560000	80600000	B4	B3	B3	B2	B4
chr1	80600000	80640000	B4	B3	B3	B2	B4
chr1	80640000	80680000	B4	B3	B1	B2	B4
chr1	80680000	80720000	B4	B3	B1	A4	B4
chr1	80720000	80760000	B4	B3	B1	A4	B4
chr1	80760000	80800000	B4	B3	B1	A4	B4
chr1	80800000	80840000	B4	B3	B1	A4	B4
chr1	80840000	80880000	B4	B3	B1	A4	B4
chr1	80880000	80920000	B4	B3	B1	A4	B4
chr1	80920000	80960000	B4	B3	B1	A4	B4
chr1	80960000	81000000	B4	B3	B2	A4	B4
chr1	81000000	81040000	B4	B3	B2	A4	B4
chr1	81040000	81080000	B2	B3	B2	A4	B4
chr1	81080000	81120000	B2	B3	B2	A4	B4
[truncated: 63,536 more rows]
